# Supplementary material for: Maternal post-traumatic stress disorder, depression and alcohol dependence and child behaviour outcomes in mother–child dyads infected with HIV: a longitudinal study
Source: PubMed Central journal article supplement — BMJ Open. 2013 Dec 10;3(12):e003638. doi: 10.1136/bmjopen-2013-003638 (PMC3863126; doi:10.1136/bmjopen-2013-003638), 2013-12-10
Supplement: bmjopen-2013-003638.draft_revisions.pdf [file bmjopen-2013-003638.draft_revisions.pdf]

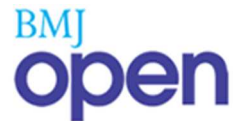

**Maternal posttraumatic stress disorder, depression and alcohol dependence and child behaviour outcomes in HIV infected mother-child dyads: a longitudinal study**

|                                 |                                                                                                                                                                                                                                                                                                                                                                                                                                                                                                                                                                  |
|---------------------------------|------------------------------------------------------------------------------------------------------------------------------------------------------------------------------------------------------------------------------------------------------------------------------------------------------------------------------------------------------------------------------------------------------------------------------------------------------------------------------------------------------------------------------------------------------------------|
| Journal:                        | <i>BMJ Open</i>                                                                                                                                                                                                                                                                                                                                                                                                                                                                                                                                                  |
| Manuscript ID:                  | bmjopen-2013-003638                                                                                                                                                                                                                                                                                                                                                                                                                                                                                                                                              |
| Article Type:                   | Research                                                                                                                                                                                                                                                                                                                                                                                                                                                                                                                                                         |
| Date Submitted by the Author:   | 22-Jul-2013                                                                                                                                                                                                                                                                                                                                                                                                                                                                                                                                                      |
| Complete List of Authors:       | Nöthling, Jani; Stellenbosch University, Department of Psychiatry<br>Martin, Cherie; University of Ottawa, School of International Development and Global Studies<br>Laughton, Barbara; Stellenbosch University, Department of Paediatrics and Child Health, The Children's Infectious Diseases Clinical Research Unit (KID-CRU)<br>Cotton, Mark ; Stellenbosch University, Department of Paediatrics and Child Health, The Children's Infectious Diseases Clinical Research Unit (KID-CRU)<br>Seedat, Soraya; Stellenbosch University, Department of Psychiatry |
| <b>Primary Subject Heading</b>: | Mental health                                                                                                                                                                                                                                                                                                                                                                                                                                                                                                                                                    |
| Secondary Subject Heading:      | HIV/AIDS, Paediatrics                                                                                                                                                                                                                                                                                                                                                                                                                                                                                                                                            |
| Keywords:                       | Maternal mental health, Child behaviour and development , Posttraumatic Stress Disorder, Depression, Alcohol abuse, HIV/AIDS                                                                                                                                                                                                                                                                                                                                                                                                                                     |
|                                 |                                                                                                                                                                                                                                                                                                                                                                                                                                                                                                                                                                  |

SCHOLARONE™  
Manuscripts

1  
2  
3 **MATERNAL POSTTRAUMATIC STRESS DISORDER,**  
4  
5  
6 **DEPRESSION AND ALCOHOL DEPENDENCE AND**  
7  
8  
9 **CHILD BEHAVIOUR OUTCOMES IN HIV INFECTED**  
10  
11  
12 **MOTHER-CHILD DYADS: A LONGITUDINAL STUDY**  
13

14  
15  
16  
17  
18 Corresponding Author: Jani Nöthling, Stellenbosch University, Tygerberg Campus,  
19  
20 Department of Psychiatry, P.O. Box 19063, Tygerberg, 7505  
21  
22

23  
24  
25 Jani Nöthling,<sup>1</sup> Cherie L Martin,<sup>2</sup> Barbara Laughton,<sup>3</sup> Mark F Cotton,<sup>3</sup> Soraya Seedat<sup>1</sup>  
26  
27

28  
29 <sup>1</sup> Department of Psychiatry, Stellenbosch University, Cape Town, South Africa  
30

31  
32 <sup>2</sup> School of International Development and Global Studies, University of Ottawa,  
33  
34 Ontario, Canada

35  
36 <sup>3</sup> Department of Paediatrics and Child Health, The Children's Infectious Diseases  
37  
38 Clinical Research Unit (KID-CRU), Stellenbosch University, Cape Town, South  
39  
40 Africa  
41  
42  
43  
44  
45  
46  
47  
48  
49  
50  
51  
52  
53  
54  
55  
56  
57  
58  
59  
60

## ABSTRACT

**Objectives:** HIV and psychiatric disorders are prevalent and often concurrent. Child-bearing women are at an increased risk for both HIV and psychiatric disorders, specifically depression and posttraumatic stress disorder (PTSD). Poor mental health in the peripartum period has adverse effects on infant development and behaviour. Few studies have investigated the relationship between maternal PTSD and child behaviour outcomes in an HIV vertically infected sample. The aim of this study was to investigate if maternal postpartum trauma exposure and PTSD were risk factors for child behaviour problems. Additionally, maternal depression, alcohol abuse and functional disability were explored as co-factors.

**Setting:** The study was conducted in Cape Town, South Africa.

**Participants:** Seventy mother-child dyads infected with HIV were selected from a group of participants recruited from Community Health Centers.

**Design:** The study followed a longitudinal design. Five measures were used to assess maternal trauma exposure, PTSD, depression, alcohol abuse and functional disability at 12 months postpartum: Life Events Checklist (LEC), Harvard Trauma Scale (HTS), Alcohol Use Disorders Identification Test (Audit), Center for Epidemiological Studies Depression Scale (CESD) and the Sheehan Disability Scale (SDS). Child behaviour was assessed at 42 months with the Child Behaviour Checklist (CBCL).

**Results:** The rate of maternal disorder was high with 50% scoring above the cut-off for depression, 22.9% for PTSD, and 7% for alcohol abuse. Half of children scored within the clinical range for problematic behaviour. Children of mothers with depression were significantly more likely to display total behaviour problems than children of mothers without depression. Maternal PTSD had the greatest explanatory power for child behaviour problems although it did not significantly predict child outcomes.

**Conclusion:** This study highlights the importance of identifying and managing maternal PTSD and depression in mothers of children infected with HIV. The relationship between maternal PTSD and child behaviour warrants further investigation.

## ARTICLE SUMMARY

### Article focus

- This study investigated maternal mental health (PTSD, trauma exposure, depression and alcohol abuse) at one year postpartum as a predictor of child behaviour problems at three and a half years of age in HIV infected, mother-child dyads.
- Self-reports were used to determine the prevalence of maternal psychiatric disorders and child behaviour problems in the dyads.

### Key Messages

- Maternal depression is associated with child behaviour problems in the general population as well as in this HIV infected sample.
- Prevalence of maternal depression and PTSD is high among mothers infected with HIV and prevalence of child behaviour problems is high among their infected children.
- The influence of maternal PTSD on child behaviour warrants further investigation.

### Strengths and limitations of the study

- This study is, to our knowledge, the first to investigate PTSD as a predictor of child behaviour in vertically transmitted, HIV infected, mother-child-dyads.
- The study employed a longitudinal design with the child participants being relatively healthy as indicated by immunological status.
- The sample size of the study may have reduced statistical power and poor maternal mental health may have biased caregiver perceptions of child behaviour.

## INTRODUCTION

South Africa has a high HIV prevalence rate of 11%. [1] The prevalence of psychiatric disorders in the general South African population is also relatively high compared to other countries, with an estimated lifetime and 12-month prevalence rates of 30.3% and 16.5% respectively. [2] There is an increased risk of common psychiatric disorders associated with HIV infection [3-6] with depression nearly twice as common in infected individuals. [4] One study documented a 19% prevalence of common psychiatric disorders among HIV infected South Africans, with 14% meeting criteria for depression, 5% for posttraumatic stress disorder (PTSD) and 7% for alcohol dependence or abuse. [6] Individuals newly diagnosed with HIV are at an even higher risk for a common psychiatric disorder. [5] In addition, women are disproportionately and dually burdened by HIV and mood and anxiety disorders. Female gender is considered a risk factor for mood and anxiety disorders and for increased severity of these disorders [2] and women, especially child-bearing women, are disproportionately affected by HIV. [1]

Poor maternal mental health is associated with adverse long-term effects in child development and behaviour. [7-13] Depression, including postpartum depression, is linked to various forms of child and infant internalising and externalising behaviour problems, such as: insecure attachment and less optimal mother-child interaction; [8,10,14] higher levels of tension and lower levels of emotional development; [7] low social competence and adaptive functioning [9]; poorer cognitive development; [7] lower competencies and general behaviour problems in boys; [8] and attention-deficit hyperactivity disorder. [12] These problems can persist into adolescence. For example, infant negative emotional reactivity and shyness has been associated with inhibition and withdrawal in early childhood and with anxiety symptoms in middle childhood and adolescence. [15] Negative reactivity, low persistence, aggression and school difficulties in childhood have also been associated with substance abuse in adolescence. [16]

Furthermore, children of mothers with comorbid PTSD and depression are significantly more likely to display internalising and externalizing behaviour problems compared to children of mothers with depression only. [13] These children are more likely to display somatic symptoms and are more likely to be emotionally reactive, anxious/depressed and aggressive. [13] South Africa has a high rate of exposure to violence and traumatic events which increases risk for PTSD. [17]

1  
2  
3 Prevalence of PTSD and trauma exposure is high among individuals infected with  
4 HIV, with female gender being a significant risk factor in this group. [3-6,18,19]  
5  
6 Women infected with HIV are therefore at high risk of PTSD and their children are  
7  
8 consequently at risk of behavioural and developmental problems.

9  
10 Maternal stress and anxiety is also linked to child behaviour problems.  
11 Various studies have investigated the negative effect of antenatal maternal stress on  
12 child development. [20] Fewer studies have focussed on postpartum maternal stress  
13 and anxiety and child behaviour outcomes. However, maternal stress and anxiety is  
14 negatively associated with parenting skills, and infant and child behaviour problems.  
15 [21-23] Maternal anxiety is a significant predictor of child attention and aggression  
16 problems [24] and maternal stress is significantly associated with child anxious and  
17 depressive symptoms. [25]

18  
19 In addition to anxiety, PTSD and depression, maternal postpartum alcohol  
20 abuse/dependence has been associated with child and infant behaviour problems and  
21 developmental risk. [26-29] Alcohol abuse is one of the major contributors to disease  
22 burden in South Africa and antenatal alcohol abuse is associated with high rates of  
23 fetal alcohol spectrum disorders. [30-34] Child behaviour problems associated with  
24 parental postpartum alcohol abuse/dependence include: poor inhibitory control,  
25 attention shifting, distractibility, defiance, aggression, delinquency, emotional  
26 reactivity and withdrawal. [27,35]

27  
28 To date, few studies have investigated the relationship between maternal  
29 postpartum trauma exposure, PTSD and child behaviour outcomes. None, to our  
30 knowledge, have examined this relationship in HIV-infected individuals, despite  
31 evidence of high prevalence of PTSD in this group and its public health implications.  
32 This is of significant public health concern particularly in the South African context.  
33 The primary aim of this study was to investigate the impact of maternal trauma  
34 exposure and PTSD at a specific time point (12 months postpartum) and the long-term  
35 effect thereof on child behaviour (at three and a half years of age) in mother-child  
36 dyads, infected with HIV, while controlling for the effects of depression. A secondary  
37 aim of the study was to investigate the relationship between maternal alcohol  
38 dependence/abuse, functional disability and child behaviour outcomes.

## METHODS

### Participants

Seventy mother-child dyads infected with HIV participated in the study from 2005 onwards. In eight cases, the maternal caregiver was not the child's biological mother. Maternal/mother within the context of this study therefore refers to either the biological mothers or primary caregiver of the child. The mother-child dyads were selected, based on the completeness of their data, as a sub-group from the Children with HIV Early Antiretroviral Therapy (CHER) trial. HIV-infected infants entered the study at a mean of seven weeks of age and were randomised to early antiretroviral therapy for either 40 weeks or 96 weeks followed by planned treatment interruption or deferred therapy until meeting treatment guideline thresholds at that time; a CD4 below 20% (25% in first year of life) or progression of HIV disease. This study commenced in 2005 and ended in 2011. [36] The study was conducted in two South African sites, the Perinatal HIV Research Unit in Soweto and the Children's Infectious Diseases Clinical Research Unit (KID-CRU), in Tygerberg Children's Hospital, Cape Town. Participants were identified and recruited from local community health centres through HIV vertical transmission prevention programs. A neurodevelopmental sub-study was conducted in KID-CRU, and the data collected at this site was used in the current study.

### Study Design

The neurodevelopmental sub-study reported herein was conducted over five years, and included all infants with birth weight >2000g and normal neurological examination before 12 weeks of age and excluded infants with CNS insults other than due to HIV. Maternal assessments were completed at 10-12 months and infant assessments at 42 months of age. The Committee for Health Research at Stellenbosch University, Cape Town, South Africa, approved the study.

### Procedures

Informed consent was obtained from all mothers of infants infected with HIV, in their preferred language (English, Afrikaans or isiXhosa). Maternal participants completed a series of questionnaires including a demographic questionnaire, the Life Events Checklist (LEC), the Harvard Trauma Scale (HTS), the Alcohol Use Disorder Identification Test (Audit), the Center for Epidemiologic Studies Depression Scale

1  
2  
3 (CESD), and the Sheehan Disability Scale (SDS). The same battery of questionnaires  
4 was completed at five different time points over the course of five years. These self-  
5 report measures were verbally administered in Afrikaans and English by a trained  
6 research psychologist. A trained research assistant was used for Xhosa-speaking  
7 mothers.  
8  
9

10  
11 Child behaviour was assessed at 42 months postpartum using the Child  
12 Behaviour Checklist (CBCL) which the mothers or caregivers, who were living with  
13 the children for the previous six months and took responsibility for caring for the  
14 child, completed on their own. The CBCL was administered by a research assistant if  
15 the mothers were illiterate or had difficulty completing the assessment.  
16  
17

18 Immunodeficiency in children was measured using CD4 percentages and absolute  
19 scores. Immunodeficiency was determined in according to the World Health  
20 Organisation's guidelines on the classification of HIV associated immunodeficiency  
21 in children. [37] The CD4 counts and percentages of children were determined on a  
22 regular basis, but viral loads were only determined if there were concerns about  
23 treatment failure. Maternal CD4 counts and viral loads were not assessed as mothers  
24 were not receiving treatment at the same facility as the children.  
25  
26  
27  
28  
29  
30  
31

### 32 33 **Measures**

#### 34 Demographic Questionnaire

35 Biographical information regarding maternal age, ethnicity, language, marital status,  
36 education, annual household income, employment status and gender of the child was  
37 determined through a demographic questionnaire. The relationship of the caregiver to  
38 the child was also obtained.  
39  
40  
41  
42  
43

#### 44 Life Events Checklist

45 Traumatic life events were measured using the Life Events Checklist (LEC) The Life  
46 Events Checklist is a 16-item self-report questionnaire assessing the incidence of 16  
47 different categories of traumatic events including physical assault, life threatening  
48 illness, natural disasters, sexual assault, and sudden unexpected death of a loved one.  
49 Participants had three optional responses to each item; direct 'happened to me',  
50 indirect 'witnessed it', and removed 'heard about it'. A score was then tallied for the  
51 total number of direct Life Events. Respondents who reported directly experienced  
52 trauma were asked to complete the Harvard Trauma Scale.  
53  
54  
55  
56  
57  
58  
59  
60



### Harvard Trauma Scale

The Harvard Trauma Scale (HTS) is a 30-item, self-report questionnaire designed to screen for the presence of PTSD in cross-cultural populations. [38] Examples of items include ‘feeling as though the event is happening again’ and ‘nightmares about the event that keep coming back’. Symptoms are reported on a four point Likert scale ranging from “not at all” to “extremely”, with a total score range of 30 to 120. The cut-off score indicative of PTSD is 75 or higher. The HTS is regarded a valid and reliable measure to screen for a diagnosis of PTSD where cross-cultural sensitivity is necessary. [39]

### Alcohol Use Disorders Identification Test

Alcohol dependence and abuse were measured using the Alcohol Use Disorders Identification Test (Audit). The 10-item questionnaire assesses alcohol dependence and abuse and is scored on a five point Likert scale from “never” to “daily or almost daily”. The cut-off score is set at eight for alcohol abuse and 13 or more for alcohol dependence. The Audit is a reliable measure developed by the World Health Organisation and has been implemented and tested internationally. [40] It has been applied in a variety of settings and cultures [41-43] including Mexico, [44] Venezuela, [45] Hong Kong, [46] Zimbabwe [47] and in South Africa with HIV-infected patients. [48,49] In each of these studies the Audit outperformed other self-report measures in the identification of alcohol abuse and dependence.

### Center for Epidemiological Studies Depression Scale

The Center for Epidemiological Studies Depression Scale (CESD) is a self-report measure to screen for depression. The CESD is a 20-item scale that assesses current levels of depression as per DSM-IV criteria. Responses are measured on a four point Likert scale ranging from “rarely or none of the time” to “most or all of the time”. A score of 16 or more is considered indicative of depression. The CESD has been validated for clinic and community settings to detect depressive symptoms [50-52] and in many cross-cultural samples [53-55] and across ethnic groups. [56,57] The CESD has been used to measure depression in several clinic samples of individuals infected with HIV. [58,59,60,61]

### The Sheehan Disability Scale

The Sheehan Disability Scale (SDS) is a self-report measure used to evaluate patients' functional impairment in relation to self-reported symptoms. [62] Functional disability is assessed across three core areas, namely, work/school, social life, and at home/family responsibilities. Functioning is reported on a visual analogue scale ranging from zero to ten. Higher scores indicate greater impairment and disability. The SDS is frequently used in clinical trials in psychiatry and is a valid, reliable measure of functional disability, responsive to change over time. [63]

### The Child Behaviour Checklist

Child behaviour problems were assessed using the preschool version of the Child Behaviour Checklist (CBCL). [64] The CBCL is a 100 item self-report questionnaire, usually completed by a parent or caregiver. The items are scored on a three point Likert scale ranging from "not true" to "very true or often true". Behavioural problems are measured in eight domains, namely, emotionally reactive, anxious/depressed, somatic complaints, withdrawn behaviour, sleep problems, common/non-specific problems, attention problems and aggressive behaviour. The first four domains are viewed as internalising behaviour problems, the last two domains are viewed as externalising behaviour problems and all of the domains combined are viewed as total behaviour problems. The CBCL is a widely used behavioural checklist with good reliability and validity in a variety of cultural and language settings. [65,66,67]

### Data analysis

All analyses were performed using Statistical Analysis Software (SAS) and SPSS version 20. Descriptive statistics were computed for the demographic characteristics of the sample as well as the prevalence rates of maternal mental health problems and child behavioural problems. Differences in behaviour problems between children of mothers with and without PTSD, depression and alcohol abuse were analysed by means of t-tests. Linear regression analysis was performed to determine if maternal mental status was a significant predictor of child behaviour outcomes. Of particular interest was the influence of trauma exposure and PTSD on child behaviour outcomes. Depression was controlled for due to previous studies reporting a relationship between depression and child behaviour problems.

1  
2  
3 Three models were run with the following continuous outcome variables as  
4 measured by the CBCL: total child behavioural problems (internalising, externalising  
5 and sleep problems), child internalising behaviour problems and child externalising  
6 behaviour problems. The same continuous predictor variables were used in all three  
7 regression models. The predictor variables were: exposure to traumatic life events  
8 (LE), PTSD symptomatology (HTS), alcohol abuse/dependence (Audit), depression  
9 (CESD) and functional disability (SDS).  
10  
11  
12  
13

## 14 15 16 **RESULTS**

### 17 **Sample demographics**

18 The sample included 70 mother-child dyads, each being HIV-infected. The mean age  
19 of the mothers/caregivers at 12 months postpartum was 28.8 (range: 16-64) years. The  
20 mother-child dyads were mainly black (88.6%) and Xhosa speaking (65.7%). The  
21 mothers were mostly single (64.3%) and unemployed (80.9%). The majority of  
22 mothers had some secondary schooling (58.6%) with an annual income below  
23 R10 000 (US\$1038). Thirty-six children (51%) were female. The majority of  
24 caregivers at 10 to 12 months (94.3%) and 42 months (91.4%) were the biological  
25 mothers of the children, however there were eight changes in caregiver from 12  
26 months postpartum to 42 months postpartum. Reasons for change in caregiver  
27 included: mother passed away (n = 3), mother was unavailable on the day of  
28 assessment (n = 2), and the person attending lived with the child and was closely  
29 involved in caring for the child (n = 3).  
30  
31  
32  
33  
34  
35  
36  
37  
38

39 At 42 months, the majority of the children did not have CD4 percentages  
40 (91.4%, range: 16.3%-53.6%) or absolute scores (100%, range: 468-3267) indicative  
41 of immunodeficiency. The prevalence of infant immunodeficiency was higher at 10 to  
42 12 months postpartum with 47.1% (range: 15.4%-54.5%) and 40% (range: 574-3777)  
43 showing mild to severe immunodeficiency based on CD4 percentages and absolute  
44 scores respectively. The demographic and biological information of participants are  
45 presented in Table 1.  
46  
47  
48  
49  
50  
51  
52  
53  
54  
55  
56  
57  
58  
59  
60

Table 1  
*Demographic layout of the sample*

|                                                                     | N  | %    | M    |
|---------------------------------------------------------------------|----|------|------|
| Relationship of carer to child at 12 months postpartum <sup>1</sup> | 70 |      |      |
| Mother                                                              | 66 | 94.3 |      |
| Grandmother                                                         | 2  | 2.9  |      |
| Aunt                                                                | 1  | 1.4  |      |
| Guardian                                                            | 1  | 1.4  |      |
| Relationship of carer to child at 42 months postpartum <sup>2</sup> | 70 |      |      |
| Mother                                                              | 64 | 91.4 |      |
| Grandmother                                                         | 5  | 7.1  |      |
| Aunt                                                                | 1  | 1.4  |      |
| Age of mother/caregiver <sup>1</sup>                                | 70 |      | 28.8 |
| Gender of child <sup>1</sup>                                        | 70 |      |      |
| Male                                                                | 34 | 48.6 |      |
| Female                                                              | 36 | 51.4 |      |
| Language <sup>1</sup>                                               | 70 |      |      |
| Afrikaans                                                           | 9  | 12.9 |      |
| English                                                             | 15 | 21.4 |      |
| Xhosa                                                               | 46 | 65.7 |      |
| Ethnicity <sup>1</sup>                                              | 70 |      |      |
| Black                                                               | 62 | 88.6 |      |
| Coloured                                                            | 3  | 4.3  |      |
| White                                                               | 4  | 5.7  |      |
| Asian                                                               | 1  | 1.4  |      |
| Marital Status <sup>1</sup>                                         | 70 |      |      |
| Single                                                              | 45 | 64.3 |      |
| Married/living with a partner                                       | 23 | 32.9 |      |
| Divorced/separated                                                  | 2  | 2.9  |      |
| Annual Income <sup>1</sup>                                          | 70 |      |      |
| < R10 000                                                           | 51 | 72.9 |      |
| R 10 000 – R20 000                                                  | 11 | 15.7 |      |
| R 20 000 – R 40 000                                                 | 2  | 2.9  |      |
| R 40 000 – R 60 000                                                 | 0  | 0    |      |
| R 60 000 – R 100 000                                                | 1  | 1.4  |      |
| > R 100 000                                                         | 0  | 0    |      |

|                                                             | N  | %    | M      |
|-------------------------------------------------------------|----|------|--------|
| Level of Education <sup>1</sup>                             | 70 |      |        |
| No schooling                                                | 0  | 0    |        |
| Some primary schooling                                      | 7  | 10   |        |
| Completed primary school                                    | 3  | 4.3  |        |
| Some secondary schooling                                    | 41 | 58.6 |        |
| Grade 12 completed                                          | 18 | 25.7 |        |
| Higher education completed                                  | 1  | 1.4  |        |
| Employment Status <sup>1</sup>                              | 68 |      |        |
| Employed                                                    | 13 | 19.1 |        |
| Unemployed                                                  | 55 | 80.9 |        |
| Immunodeficiency (CD4 percentage) of child <sup>1</sup>     | 70 |      | 36.1   |
| Not significant (>30%)                                      | 37 | 52.9 |        |
| Mild (25-30%)                                               | 15 | 21.4 |        |
| Advanced (20-24%)                                           | 12 | 17.1 |        |
| Severe (<20%)                                               | 6  | 8.6  |        |
| Immunodeficiency (CD4 absolute score) of child <sup>1</sup> | 70 |      | 1862.6 |
| Not significant                                             | 42 | 60   |        |
| Significant (<750)                                          | 28 | 40   |        |
| Immunodeficiency (CD4 percentage) of child <sup>2</sup>     |    |      | 34.3   |
| Not significant (>25%)                                      | 64 | 91.4 |        |
| Mild (20-25%)                                               | 4  | 5.7  |        |
| Advanced (15-19%)                                           | 2  | 2.9  |        |
| Severe (<15%)                                               | 0  | 0    |        |
| Immunodeficiency (CD4 absolute score) of child <sup>2</sup> |    |      | 1374.2 |
| Not significant                                             | 70 | 100  |        |
| Significant (<350)                                          | 0  | 0    |        |

<sup>1</sup>Data recorded at 12 months postpartum

<sup>2</sup>Data recorded at 42 months postpartum

### Prevalence of maternal psychiatric disorders and child behaviour problems

The prevalence rate for all maternal psychiatric disorders was 27.6%. Depression was the most prevalent disorder at 50% (n = 35), followed by PTSD with 22.9% (n = 16), alcohol abuse with 7.1% (n = 5) and alcohol dependence with 2.9% (n = 2). A large proportion of children scored within the clinical range for problematic behaviour with a prevalence rate of 44.3% (n = 31) for total behaviour problems. Internalising behaviour problems were most prevalent with 50% of children scoring above cut-off. The most common internalising behaviour problems were somatic complaints (n =

28), followed by withdrawn behaviour (n = 20), emotional reactivity (n = 15) and anxious/depressed behaviour (n = 10). Externalising behavioural problems were less prevalent with 30% (n = 21) of children scoring within the clinical range. Aggressive behaviour (n = 12) was the most common externalising behaviour problem followed by attention problems (n = 8). Sleeping problems (n = 3) was the least common behaviour problem (see Table 2).

Table 2  
Descriptive statistics for maternal mental health and child behaviour problems

|                                                      | M     | SD    | Above cut-off |      |
|------------------------------------------------------|-------|-------|---------------|------|
|                                                      |       |       | N             | %    |
| Directly experienced life events (LE) <sup>1</sup>   | 2.36  | 2.13  |               |      |
| Substance abuse (Audit) <sup>1</sup>                 | 1.30  | 3.45  |               |      |
| Hazardous drinking                                   |       |       | 5             | 7.1  |
| Alcohol dependence                                   |       |       | 2             | 2.9  |
| Depression (CESD) <sup>1</sup>                       | 17.40 | 14.05 | 35            | 50   |
| Posttraumatic Stress Disorder (HTS) <sup>1</sup>     | 59.67 | 21.36 | 16            | 22.9 |
| Functional disability (SDS) <sup>1</sup>             | 7.11  | 6.75  |               |      |
| Total behaviour problems (CBCL) <sup>2 3</sup>       | 46.41 | 29.30 | 31            | 44.3 |
| Sleep                                                | 3.16  | 2.67  | 3             | 4.3  |
| Internalising behaviour problems (CBCL) <sup>2</sup> | 14.67 | 11.07 | 35            | 50.0 |
| Emotional reactive                                   | 3.20  | 3.39  | 15            | 21.4 |
| Anxious/depressed                                    | 3.73  | 2.85  | 10            | 14.3 |
| Somatic                                              | 4.61  | 3.57  | 28            | 40.0 |
| Withdrawn                                            | 3.13  | 3.02  | 20            | 28.6 |
| Externalising behaviour problems (CBCL) <sup>2</sup> | 14.59 | 9.07  | 21            | 30.0 |
| Attention                                            | 2.74  | 1.97  | 8             | 11.4 |
| Aggression                                           | 11.84 | 7.77  | 12            | 17.1 |

<sup>1</sup>Maternal measures

<sup>2</sup>Child measures

<sup>3</sup>Total behaviour problems comprise of internalising behaviour problems, externalising behaviour problems and sleeping problems.

### Maternal mental health as a predictor of child behaviour outcomes

The children of mothers with depression ( $M = 53.74$ ,  $SE = 28.53$ ) were significantly more likely to display behaviour problems  $t(68) = 2.15$ ,  $p = .035$ , compared to the children of mothers without depression ( $M = 39.09$ ,  $SE = 28.59$ ). The children of mothers meeting criteria for PTSD ( $M = 54.06$ ,  $SE = 18.97$ ) were more likely to display behaviour problems compared to the children of mothers who did not meet criteria for PTSD ( $M = 44.25$ ,  $SE = 30.76$ ), but this was not a significant effect  $t(58) = 1.19$ ,  $p = .238$ . The children of mothers who abused alcohol ( $M = 52.60$ ,  $SE = 24.52$ ) were also more likely to display behaviour problems, compared to the children of mothers who did not abuse alcohol ( $M = 45.94$ ,  $SE = 29.74$ ), but this effect was also not significant  $t(68) = .49$ ,  $p = .628$  (see table 3).

Table 3

*Comparison of CBCL scores for child behaviour problems based on maternal mental status*

|                                              | M     | SD    | Df | t    | p    |
|----------------------------------------------|-------|-------|----|------|------|
| Maternal depression (CESD)                   |       |       | 68 | 2.15 | .035 |
| Children of mothers with depression          | 53.74 | 28.53 |    |      |      |
| Children of mothers without depression       | 39.09 | 28.59 |    |      |      |
| Maternal PTSD (HTS)                          |       |       | 58 | 1.19 | .238 |
| Children of mothers with PTSD                | 54.06 | 18.97 |    |      |      |
| Children of mothers without PTSD             | 44.25 | 30.76 |    |      |      |
| Maternal alcohol abuse (Audit)               |       |       | 68 | .49  | .628 |
| Children of mother who abuse alcohol         | 52.60 | 24.52 |    |      |      |
| Children of mothers who do not abuse alcohol | 45.94 | 29.74 |    |      |      |

Table 4 presents the results of the regression analyses with predictor variables, their standardized coefficients and significance levels for the outcome variables: child total behaviour problems (Model 1), child internalising behaviour problems (Model 2) and child externalising behaviour problems (Model 3). Table 5 presents the summary statistics for the regression analysis.

Table 4  
Parameters for the variables predicting child behaviour outcomes (N=59)

| Model |                                   | Unstandardised |            | Standardised Beta coefficients | t     | Sig. | 95% Confidence Interval |             |
|-------|-----------------------------------|----------------|------------|--------------------------------|-------|------|-------------------------|-------------|
|       |                                   | $\beta$        | Std. error |                                |       |      | Lower limit             | Upper limit |
| 1     | Total problems (Constant)         | 26.02          | 11.49      |                                | 2.27  | .028 | 4.33                    | 47.71       |
|       | Traumatic life events (LE)        | -1.79          | 1.91       | -.13                           | -.94  | .352 | -5.40                   | 1.81        |
|       | Alcohol dependance/abuse (Audit)  | -.14           | 1.07       | -.02                           | -.13  | .894 | -2.16                   | 1.87        |
|       | Depression (CESD)                 | .20            | .33        | .10                            | .61   | .546 | -.42                    | .82         |
|       | Functional disability (SDS)       | .24            | .60        | .06                            | .40   | .688 | -.89                    | 1.38        |
|       | PTSD (HTS)                        | .35            | .26        | .27                            | 1.38  | .173 | -.13                    | 0.83        |
| 2     | Internalising problems (Constant) | 8.14           | 4.30       |                                | 1.89  | .064 | .02                     | 16.27       |
|       | Traumatic life events (LE)        | -1.18          | .72        | -.23                           | -1.64 | .106 | -2.53                   | .18         |
|       | Alcohol dependance/abuse (Audit)  | -.39           | .40        | -.13                           | -.99  | .328 | -1.15                   | .36         |
|       | Depression (CESD)                 | .14            | .12        | .19                            | 1.12  | .268 | -.09                    | .37         |
|       | Functional disability (SDS)       | .06            | .22        | .04                            | .28   | .781 | -.36                    | .49         |
|       | PTSD (HTS)                        | .12            | .10        | .24                            | 1.29  | .203 | -.06                    | .30         |
| 3     | Externalising problems (Constant) | 6.05           | 3.62       |                                | 1.67  | .100 | -.78                    | 12.88       |
|       | Traumatic life events (LE)        | -.15           | .60        | -.03                           | -.25  | .807 | -1.28                   | .99         |
|       | Alcohol dependance/abuse (Audit)  | .37            | .34        | .15                            | 1.12  | .270 | -.26                    | 1.01        |
|       | Depression (CESD)                 | .01            | .10        | .02                            | .11   | .909 | -.18                    | .21         |
|       | Functional disability (SDS)       | .02            | .19        | .01                            | .08   | .936 | -.34                    | .37         |
|       | PTSD (HTS)                        | .14            | .08        | .34                            | 1.79  | .079 | -.01                    | .30         |

1. Outcome: total child behaviour problems (CBCL)
2. Outcome: internalising child behaviour problems (CBCL)
3. Outcome: externalising child behaviour problems (CBCL)



Table 5  
 Model summary predicting child behaviour problems

| Model | R <sup>2</sup> | ΔR <sup>2</sup> | F    | df1 | df2 | p    |
|-------|----------------|-----------------|------|-----|-----|------|
| 1     | .119           | .036            | 1.44 | 5   | 53  | .227 |
| 2     | .150           | .070            | 1.88 | 5   | 53  | .114 |
| 3     | .147           | .067            | 1.83 | 5   | 53  | .123 |

1. Predictors: maternal traumatic life events (LE), maternal alcohol dependence/abuse (Audit), maternal depression (CESD), maternal functional disability (SDS), maternal PTSD (HTS). Outcome: total child behaviour problems (CBCL)
2. Predictors: maternal traumatic life events (LE), maternal alcohol dependence/abuse (Audit), maternal depression (CESD), maternal functional disability (SDS), maternal PTSD (HTS). Outcome: internalising child behaviour problems (CBCL)
3. Predictors: maternal traumatic life events (LE), maternal alcohol dependence/abuse (Audit), maternal depression (CESD), maternal functional disability (SDS), maternal PTSD (HTS). Outcome: externalising child behaviour problems (CBCL)

The linear combination of maternal variables, namely, traumatic life events, PTSD, depression, alcohol dependence/abuse and functional disability explained 3.63% of the variance in total child behaviour problems in model 1. The amount of variance explained was not significant  $F(5,53) = 1.44, p = .226$ . None of the predictor variables significantly contributed to predicting child behaviour problems within this model. Maternal PTSD  $\beta = .35, t(59) = 1.38, p = .173$  made the largest contribution to explaining child total behaviour problems, based on standardised beta coefficients and significance levels, followed by traumatic life events  $\beta = -1.79, t(59) = -.94, p = .352$ , depression  $\beta = .20, t(59) = .61, p = .546$ , disability in functioning  $\beta = .24, t(59) = .40, p = .688$  and alcohol dependence/abuse  $\beta = -.14, t(59) = -.13, p = .894$ .

The linear combination of the maternal variables in model 2 explained 7.02% of the variance in child internalising behaviour problems. The amount of variance explained in this model was also not significant  $F(5,53) = 1.44, p = .226$ . None of the predictor variables significantly contributed to predicting child internalising behaviour problems. Maternal PTSD  $\beta = .12, t(59) = 1.29, p = .203$  made the largest contribution to explaining child internalising behaviour problems, based on standardised Beta coefficients, followed by traumatic life events  $\beta = -1.18, t(59) = -1.64, p = .106$ , depression  $\beta = .14, t(59) = 1.12, p = .268$ , alcohol dependence/abuse  $\beta = -.39, t(59) = -.99, p = .328$  and functional disability  $\beta = .06, t(59) = .28, p = .781$ .

1  
2  
3 Maternal variables explained 6.66% of the variance in child externalising  
4 behaviour problems in model 3 and the variance explained was once again not  
5 significant  $F(5,53) = 1.83, p = .123$ . None of the predictor variables significantly  
6 contributed to explaining child externalising behaviour problems. Maternal PTSD  $\beta =$   
7  $.14, t(59) = 1.79, p = .079$  made the largest contribution, based on standardised beta  
8 coefficients and significance levels, followed by alcohol dependence/abuse  $\beta = .37,$   
9  $t(59) = 1.12, p = .270$ , traumatic life events  $\beta = -.15, t(59) = -.25, p = .807$ , depression  
10  $\beta = .01, t(59) = .11, p = .909$  and functional disability  $\beta = .02, t(59) = .08, p = .936$ .

## 17 DISCUSSION

18 The present study examined the long term effects of maternal mental health and child  
19 behaviour outcomes in a sample of mother-child dyads infected with HIV. Firstly, we  
20 found that maternal mental disorders and child behaviour problems were common  
21 among HIV infected mothers and vertically infected children. The overall prevalence  
22 of maternal psychiatric disorders was 27.6%. Previous studies have reported  
23 prevalence rates of 19% to 56% among HIV infected samples. [3-6] Half of mothers  
24 in this study scored above the cut-off for depression, followed by 22.9% for PTSD,  
25 7.1% for alcohol abuse and 2.9% for alcohol dependence. Previous studies similarly  
26 have reported high prevalence rates, among samples infected with HIV, for depression  
27 (14% - 36%), PTSD (5% - 14.8%) and alcohol dependence (7%). [3-6] The results of  
28 this study revealed even higher prevalence rates for depression and PTSD and lower  
29 prevalence rates for alcohol dependence. The high prevalence rate of PTSD could  
30 possibly be biased by female gender, a previously identified risk factor for PTSD in  
31 HIV infected individuals. [18] The low rate of alcohol dependence might be due to the  
32 use of prenatal alcohol exposure as an exclusion criterion for participation in the  
33 study.

34 A high rate of child behaviour problems (44.3% for total behaviour problems)  
35 was also found. The prevalence rate for internalising and externalising behaviour  
36 problems, which fell within the clinical range, was 50% and 30% respectively. The  
37 children in this sample are therefore at greater risk of developing psychiatric  
38 disorders, such as anxiety and substance abuse disorders, later in life. [15,16]

39 Second, children of mothers with depression were significantly more likely to  
40 exhibit behaviour problems than the children of mothers without depression, although  
41 this association was not significant for maternal PTSD or alcohol abuse/dependence.

1  
2  
3 Various studies have found significant links between maternal depression and  
4 internalising and externalising child behaviour problems. [7-10,12] This relationship  
5 was investigated in this study in an effort to control for the probable shared variance  
6 between depression and PTSD. Depression was not a significant predictor within the  
7 regression models of total behaviour problems, internalising or externalising  
8 behaviour problems.  
9

10  
11  
12  
13 Third, maternal trauma exposure, PTSD, depression, alcohol  
14 abuse/dependence and functional disability did not significantly predict child  
15 behaviour outcomes. However, PTSD made the largest contribution in predicting  
16 internalising, externalising and total behaviour problems. This relationship between  
17 PTSD and child behaviour problems warrants further investigation. Similar results  
18 have been reported, a significant association has been found between maternal stress  
19 and anxiety and child internalising and externalising problems. [24,25] The children  
20 of mothers with comorbid PTSD and depression also have an increased risk for  
21 internalising and externalising behaviour problems, compared to mothers with  
22 depression alone or no disorder. [13] While previous studies have found significant  
23 associations between parental (specifically maternal) alcohol abuse and child  
24 developmental and behaviour problems, [35,68] in the present study no significant  
25 relationship was found between alcohol dependence/abuse, functional disability and  
26 child behavioural outcomes in regression analyses.  
27

28  
29  
30  
31  
32  
33  
34  
35  
36  
37  
38  
39  
40  
41  
42  
43  
44  
45  
46  
47  
48  
49  
50  
51  
52  
53  
54  
55  
56  
57  
58  
59  
60  
A number of study limitations deserve mention. In eight cases, there was a  
change in the caregiver completing the maternal assessment at 12 months compared  
with the caregiver completing the child assessment at 42 months. More than one  
administrator was used which may have caused inconsistency in the administration of  
self-reports. Additionally, the maternal mental state and child behaviour outcomes  
were measured using self-reports and not a clinician diagnosis. The mental state of the  
caregivers may have contributed to biased perceptions of child behaviour being  
endorsed. Only 70 mother-child dyads participated in the study and 11 of the 70 were  
excluded from the regression analysis owing to missing data. The small sample size  
may have compromised statistical power for the analyses. Lastly, there was no HIV  
negative control or comparator group.

Nevertheless, several characteristics of the sample distinguish this study from  
previous research samples. This is, to our knowledge, the first study investigating the  
predictive effect of PTSD on child behaviour in vertically transmitted, HIV infected

1  
2  
3 children. The maternal assessments included in this study were completed at 12  
4 months postpartum which was deemed a salient period for examining PTSD in new  
5 mothers and was intended to decrease the risk of confounding by postpartum  
6 depression, as the risk for postpartum depression is highest within the first year after  
7 giving births. The study followed a longitudinal design and investigated the long-term  
8 child outcomes of maternal mental health at a specific point in time. Biological  
9 markers (e.g. CD4 counts) indicated that the children were relatively healthy at the  
10 time of assessment thus minimizing the possibility of poor physical health being a  
11 confounding factor. All mother-child dyads had routine check ups, counseling, HIV  
12 information sessions and antiretroviral treatment available to them. The level of  
13 intervention and care provided may have contributed positively to maternal mental  
14 health and child behaviour outcomes and requires further investigation. Findings of  
15 this study highlight the need to screen for and manage maternal PTSD and depression  
16 in mothers-child dyads infected with HIV. Identifying the mechanisms by which  
17 maternal mental health variables, specifically PTSD, interact and function in relation  
18 to child development in vertically transmitted HIV also requires exploration in future  
19 larger sample longitudinal studies.  
20  
21  
22  
23  
24  
25  
26  
27  
28  
29  
30  
31

### 32 **Acknowledgements**

33 We thank the parents and children taking part in the study and the KID-CRU  
34 personnel. Thanks to Lungiswa Rosy Khethelo and Marina Basson for assistance with  
35 data collection and to Justin Harvey for assistance with the data analysis.  
36  
37  
38  
39  
40

### 41 **Funding**

42 Support for this study was provided by the US National Institute of Allergy and  
43 Infectious Diseases (NIAID) through the CIPRA network, Grant U19 AI53217; the  
44 Departments of Health of the Western Cape and Gauteng, South Africa; and  
45 GlaxoSmithKline. Additional support was provided with Federal funds from the  
46 National Institute of Allergy and Infectious Diseases, National Institutes of Health,  
47 United States Department of Health and Human Services, under Contract No.  
48 HHSN272200800014C. The views expressed in written conference materials or  
49 publications and by speakers and moderators at HHS-sponsored conferences, do not  
50 necessarily reflect the official policies of the Department of Health and Human  
51 Services; nor does mention of trade names, commercial practices, or organizations  
52  
53  
54  
55  
56  
57  
58  
59  
60

1  
2  
3 imply endorsement by the U.S. Government. Additionally the study was funded  
4 through grants from the Harry Crossley Foundation and the South African Medical  
5 Research Council (MRC). While the work was supported by the MRC, the views and  
6 opinions expressed are not those of the MRC but of the authors of the material  
7 produced.  
8  
9  
10

### 11 12 13 **Competing Interests**

14 None  
15  
16

### 17 18 **Contributorship**

19 Ms Jani Nöthling: data analysis and interpretation, writing of manuscript

20 Ms Cherie Martin: interpretation of analysis, writing of manuscript

21 Dr Barbara Laughton: concept design, project leader of neurodevelopmental study,  
22 oversight of child behaviour data, revision of manuscript, read and approved  
23 manuscript  
24

25 Prof Mark Cotton: revision of manuscript, co-PI of study for the children with HIV  
26 Early Antiretroviral (CHER) trial for the HIV-infected infants  
27

28 Prof Soraya Seedat: concept design, oversight of data analysis, revision of manuscript,  
29 read and approved manuscript  
30

31 Ms Marina Basson: data collection

32 Ms Lungiswa Rosy Khethelo: data collection

33 Dr Justin Harvey: data analysis  
34  
35  
36  
37  
38  
39  
40

### 41 **Data sharing**

42 No additional data are available.  
43  
44  
45  
46  
47  
48  
49  
50  
51  
52  
53  
54  
55  
56  
57  
58  
59  
60

1  
2  
3  
4  
5  
6  
7  
8  
9  
10  
11  
12  
13  
14  
15  
16  
17  
18  
19  
20  
21  
22  
23  
24  
25  
26  
27  
28  
29  
30  
31  
32  
33  
34  
35  
36  
37  
38  
39  
40  
41  
42  
43  
44  
45  
46  
47  
48  
49  
50  
51  
52  
53  
54  
55  
56  
57  
58  
59  
60

## REFERENCES

1. Joint United Nations Programme on HIV/AIDS. (UNAIDS). Report on the global AIDS epidemic, 2010.  
[http://www.unaids.org/globalreport/global\\_report.htm](http://www.unaids.org/globalreport/global_report.htm) (accessed 1 Jul 2013)
2. Herman AA, Stein DJ, Seedat S, et al. The South African stress and health (SASH) study: 12-month and lifetime prevalence of common mental disorders. *S Afr Med J* 2009; **99**: 339-44.
3. Bing EG, Burnam A, Longshore D, et al. Psychiatric disorders and drug use among human immunodeficiency virus-infected adults in the united states. *Arch Gen Psychiatry* 2001; **58**: 721-8.
4. Ceisla JA, Roberts JE. Meta-analysis of the relationship between HIV infection and risk foe depressive disorders. *Am J Psychiatry* 2001; **158**: 725-30.

- 1  
2  
3 5. Olley BO, Seedat S, Stein DJ. Persistence of psychiatric disorders in a cohort  
4 of HIV/AIDS patients in South Africa: A 6-month follow-up study. *J*  
5 *Psychosom Res* 2006; **61**: 479-84.
- 6  
7  
8 6. Myer L, Smit J, Le Roux L, et al. Parker, S., Stein, D.J., & Seedat, S. (2008).  
9 Common mental disorders among HIV-infected individuals in South Africa:  
10 prevalence, predictors, and validation of brief psychiatric ratings scales. *AIDS*  
11 *Patient Care STDS* 2008; **22**: 147-58.
- 12  
13  
14 7. Murray L, Cooper PJ. The impact of postpartum depression on child  
15 development. *Int Rev Psychiatry* 1996; **8**: 55-63.
- 16  
17  
18 8. Carter AS, Garrity-Rokous FE, Chazan-Cohen R et al. Maternal depression  
19 and comorbidity: predicting early parenting, attachment security, and toddler  
20 social-emotional problems and competencies. *J Am Acad Child Adolesc*  
21 *Psychiatry* 2001; **40**: 18-26.
- 22  
23  
24 9. Luoma I, Tamminen T, Kaukonen P, et al. Longitudinal study of maternal  
25 depressive symptoms and child well-being. *J Am Acad Child Adolesc*  
26 *Psychiatry* 2001; **40**: 1367-74.
- 27  
28  
29 10. Tomlinson M, Cooper P, Murray L. The mother-infant relationship and infant  
30 attachment in a South African peri-urban settlement. *Child Dev* 2005; **76**:  
31 1044-54.
- 32  
33  
34 11. Gao W, Paterson J, Abbott M, et al. Maternal mental health and child  
35 behaviour problems at 2 years: findings from the pacific islands families  
36 study. *Aust N Z J Psychiatry* 2007; **41**: 885-95.
- 37  
38  
39 12. Chronis AM, Pelham WE, Baumann BL, et al. Maternal depression and early  
40 positive parenting predict future conduct problems in young children with  
41 Attention-Deficit/Hyperactivity Disorder. *Dev Psychol* 2007; **43**: 70-82.
- 42  
43  
44 13. Chemtob CM, Nomura Y, Rajendran K et al. Impact of maternal posttraumatic  
45 stress disorder and depression following exposure to the september 11 attacks  
46 on preschool children's behavior. *Child Dev* 2010; **81**: 1129-41.
- 47  
48  
49 14. Sanson A, Hemphill SA, Smart D. Connections between temperament and  
50 social development: a review. *Soc Dev* 2004; **13**: 142-70.
- 51  
52  
53 15. Kagan J, Snidman N. Early childhood predictors of adult anxiety disorders.  
54 *Biol Psychiatry* 1999; **46**: 1536-1541.
- 55  
56  
57  
58  
59  
60



16. Williams B, Sanson A, Toumbourou J et al. Patterns and predictors of teenagers' use of licit and illicit substances in the Australian Temperament Project cohort. Melbourne: University of Melbourne, 2000.
17. Kaminer D, Grimsrud A, Myer L, et al. Risk for post-traumatic stress disorder associated with different forms of interpersonal violence in South Africa. *Soc Sci Med* 2008; **67**: 1589-95.
18. Olley BO, Zeier MD, Seedat S, et al. Post-traumatic stress disorder among recently diagnosed patients with HIV/AIDS in South Africa. *AIDS Care* 2005; **17**: 550-557.
19. Dailey DE, Humphreys JC, Rankin SH, et al. An exploration of lifetime trauma exposure in pregnant low-income African American women. *Matern Child Health J* 2011; **15**: 410-8.
20. Talge NM, Neal C, Glover V, et al. Antenatal maternal stress and long-term effects on child neurodevelopment: how and why? *J Child Psychol Psychiatry* 2007; **48**: 245-61.
21. Murphy DA, Marelich WD, Armistead L, et al. Anxiety/stress among mothers living with HIV: effects on parenting skills and child outcomes. *AIDS Care* 2010; **22**: 1449-58.
22. Bayer JK, Hiscock H, Ukoumunne OC, et al. Early childhood aetiology of mental health problems: a longitudinal population-based study. *J Child Psychol Psychiatry* 2008; **49**: 1166-74.
23. Siantz MLL, Coronado N, Dpvydaitis T. Maternal predictors of behavioural problems among Mexican migrant farmworker children. *J Fam Nurs* 2010; **16**: 322-43.
24. Barry TD, Dunlap ST, Cotton SJ et al. The influence of maternal stress and distress on disruptive behaviour problems in boys. *J Am Acad Child Adolesc Psychiatry* 2005; **44**: 265-73.
25. Rodriguez CM. Association between independent reports of maternal parenting stress and children's internalizing symptomatology. *J Child and Fam Stud* 2011; **20**: 631-9.
26. Chatterji P, Markowitz S. The impact of maternal alcohol and illicit drug use on children's behaviour problems: evidence from the children of the national longitudinal survey of youth. *J Health Econ* 2001; **20**: 703-31.



- 1  
2  
3 27. Mun EY, Fitzgerald HE, Eye AV, et al. Treatment characteristics as predictors  
4 of externalising and internalising child behaviour problems in the context of  
5 high and low parental psychopathology. *Inf Ment Health J* 2001; **22**: 393-415.
- 6  
7  
8 28. Eiden RD, Edwards AP, Leonard KE. A conceptual model for the  
9 development of externalising behaviour problems among kindergarten  
10 children of alcoholic families: role of parenting and children's self-regulation.  
11 *Dev Psychol* 2007; **43**: 1187-201.
- 12  
13  
14 29. Jones AS. Maternal alcohol abuse/dependence, children's behaviour problems,  
15 and home environment: estimates from the national longitudinal survey of  
16 youth using propensity score matching. *J Stud Alcohol Drugs* 2007, 266-275.
- 17  
18  
19 30. Barry CD. (2005). South Africa: alcohol today. *Addiction* 2005; **100**: 426-9.
- 20  
21  
22 31. May PA, Brooke L, Gossage JP, et al. Epidemiology of fetal alcohol syndrome  
23 in a South African community in the Western Cape Province. *Am J Public*  
24 *Health* 2000; **90**: 1905-12.
- 25  
26  
27 32. May PA, Gossage JP, Marais A, et al. Maternal risk factors for fetal alcohol  
28 syndrome and partial fetal alcohol syndrome in South Africa: a third study.  
29 *Alcohol Clin Exp Res* 2008; **32**: 738-53.
- 30  
31  
32 33. Parry CDH, Bhana A, Myers B, et al. Alcohol use in South Africa: findings  
33 from the South African community epidemiology network on drug use  
34 (SACENDU) project. *J Stud Alcohol Drugs* 2002; **63**: 430-435.
- 35  
36  
37 34. Viljoen DL, Gossage JP, Brooke L, et al. Fetal alcohol syndrome  
38 epidemiology in a south African community: a second study of a very high  
39 prevalence area. *J Stud Alcohol Drugs* 2005; **66**: 593-604.
- 40  
41  
42 35. Molina BSG, Donovan JE, Belenduik KA. Familial loading for alcoholism  
43 and offspring behaviour: mediating and moderating influences. *Alc Clin*  
44 *ExpRes* 2010; **34**: 1972 – 83.
- 45  
46  
47 36. Cotton MF, Violari A, Gibb D et al. Early ART followed by interruption is  
48 safe and is associated with better outcomes than deferred ART in HIV+  
49 infants: final results from the 6-year randomized CHER trial, South Africa.  
50 19<sup>th</sup> Conference in Retrovirology and Opportunistic Infection 2012. USA:  
51 Seattle.
- 52  
53  
54 37. World Health Organization (WHO). Laboratory guidelines for enumerating  
55 CD4 T Lymphocytes in the context of HIV/AIDS. Regional Office for South-  
56 East Asia 2007.
- 57  
58  
59  
60

1  
2  
3 <http://www.who.int/hiv/amds/LaboratoryGuideEnumeratingCD4TLymphocytes.pdf>  
4 [es.pdf](http://www.who.int/hiv/amds/LaboratoryGuideEnumeratingCD4TLymphocytes.pdf) (accessed 1 Jul 2013)

- 5  
6 38. Mollica RF, Caspi-Yavin Y, Bollini P et al. The Harvard Trauma  
7 Questionnaire. Validating a cross-cultural instrument for measuring torture,  
8 trauma and posttraumatic stress disorder in Indochinese refugees. *J Nerv Ment*  
9 *Dis* 1992; **180**: 111-6.
- 10 39. Halepota AA, Wasif SA. Harvard Trauma Questionnaire: Urdu translation: the  
11 only cross-culturally validated screening instrument for the assessment of  
12 trauma and torture and their sequelae. *J Pak Med Assoc* 2001; **51**: 285-90.
- 13 40. Saunders JB, Aasland OG, Babor TF, et al. Development of the Alcohol Use  
14 Disorders Identification Test (AUDIT): WHO Collaborative Project on Early  
15 Detection of persons with Harmful Alcohol Consumption - II. *Addiction* 1993;  
16 **88**: 791-804.
- 17 41. Bohn MJ, Babor TF, Kranzler HR. The alcohol use identification test  
18 (AUDIT): validation of a screening instrument for use in medical settings. *J*  
19 *Stud Alcohol* 1995; **56**: 423-32.
- 20 42. Cherpitel CJ, Clark WB. Ethnic differences in performance of screening  
21 instruments for identifying harmful drinking and alcohol dependence in the  
22 emergency room. *Alcohol Clin Exp Res* 1995; **19**: 628-34.
- 23 43. Cherpitel CJ, Borges G. Performance of screening instruments for alcohol  
24 problems in the ER: a comparison of Mexican-Americans and Mexicans in  
25 Mexico. *Am J Drug Alcohol Abuse* 2000; **26**: 683-702.
- 26 44. Medina-Mora E, Carreno S, de la Fuente JR Experience with the alcohol use  
27 disorders identification test (AUDIT) in Mexico. *Recent Dev Alc* 1998; **14**:  
28 383-96.
- 29 45. Seale P, Seale JD, Alvarado M, et al. Prevalence of problem drinking in  
30 a Venezuelan Native American population. *Alcohol Alcohol* 2002; **37**: 198-  
31 204.
- 32 46. Leung SF, Arthur D. The alcohol use disorders identification test (AUDIT):  
33 validation of an instrument for enhancing nursing practice in Hong Kong. *Int J*  
34 *Nurs Stud* 2000; **37**: 57-64.
- 35  
36  
37  
38  
39  
40  
41  
42  
43  
44  
45  
46  
47  
48  
49  
50  
51  
52  
53  
54  
55  
56  
57  
58  
59  
60

- 1  
2  
3 47. Chinyadza E, Moyo IM, Katsumbe TM et al. Alcohol problems among  
4 patients attending five primary health care clinics in Harare city. *Cent Afr J*  
5 *Med* 1993; **39**: 26-32.
- 6  
7  
8 48. Simbayi LC, Kalichman SC, Jooste S, et al. Alcohol use and sexual risks for  
9 HIV infection among men and women receiving sexually transmitted infection  
10 clinic services in Cape Town, South Africa. *J Stud Alcohol Drugs* 2004; **65**:  
11 434-42.
- 12  
13  
14 49. Shaffer DN, Njeri R, Justice AC, et al. Alcohol abuse among patients with and  
15 without HIV infection attending public clinics in western Kenya. *East Afr*  
16 *Med J* 2004; **81**: 594-8.
- 17  
18  
19 50. Boyd JH, Weissman MM, Thompson WD, et al. Screening for depression in a  
20 community sample. Understanding the discrepancies between depression and  
21 diagnostic scales. *Arch Gen Psychiatry* 1982; **39**: 1195-2000.
- 22  
23  
24 51. Meyers JK, Weissman MM. Use of a self-report symptom scale to detect  
25 depression in a community sample. *Am J Psychiatry* 1980; **137**: 1081-4.
- 26  
27  
28 52. Roberts RE, Vernon SW. The Center for Epidemiological Studies Depression  
29 Scale: its use in a community sample. *Am J Psychiatry* 1983, **140**, 41-6.
- 30  
31  
32 53. Ghubash R, Daradkeh TK, Al Naseri KS et al. The performance of the Center  
33 for Epidemiology Study Depression Scale (CES-D) in an Arab female  
34 community. *Int J Soc Psychiatry* 2000; **46**: 241-9.
- 35  
36  
37 54. Iwata N, Buka S. Race/ethnicity and depressive symptoms: a cross-  
38 cultural/ethnic comparison among university students in East Asia, North and  
39 South America. *Soc Sci Med* 2002; **55**: 2243-52.
- 40  
41  
42 55. Munet-Vilaro F, Folkman S, Gregorich S. Depressive symptomatology in  
43 three Latino groups. *Western J Nurs Res* 1999; **21**: 209-24.
- 44  
45  
46 56. Guarnaccia PJ, Angel R, Worobey JL. The factor structure of the CES-D in  
47 the Hispanic Health and Nutrition Examination Survey: the influences of  
48 ethnicity, gender and language. *Soc Sci Med* 1989; **29**: 85-94.
- 49  
50  
51 57. Roberts RE, Rhoades HM, Vernon SW. Using the CES-D scale to screen for  
52 depression and anxiety: effects of language and ethnic status. *Psychiatr*  
53 *Res* 1990; **31**: 69-83.
- 54  
55  
56 58. Kalichman SC, Rompa D, Cage M. Distinguishing between overlapping  
57 somatic symptoms of depression and HIV disease in people living with HIV-  
58 AIDS. *J Nerv Ment Dis* 2000; **188**: 662-70.
- 59  
60

- 1  
2  
3 59. Simoni JM, Ng MT. Trauma, coping, and depression among women with  
4 HIV/AIDS in New York City. *AIDS Care* 2000; **12**: 567-80.
- 5  
6 60. Schuman P, Ohmit SE, Moore J, et al. Human Immunodeficiency Virus  
7  
8 Epidemiology Research Study. Perceived need for and use of mental health  
9 services by women living with or at risk of human immunodeficiency virus  
10 infection. *J Am Med Womens Assoc* 2001; **56**: 4-8.
- 11  
12 61. Eller LS, Mahat G. Psychological factors in Nepali former commercial sex  
13 workers with HIV. *J Nurs Sch* 2003; **35**: 53-60.
- 14  
15 62. Sheehan DV. *The anxiety disease*. Scribner: New York 1983.
- 16  
17 63. Arbuckle R, Frye MA, Brecher M, et al. The psychometric validation of the  
18 Sheehan Disability Scale (SDS) in patients with bipolar disorder. *Psychiatry*  
19 *Res* 2009; **165**: 163-74.
- 20  
21 64. Achenbach TM, Rescorla LA. *Manual for the ASEBA school-age forms and*  
22 *profiles*. Burlington: University of Vermont 2001.
- 23  
24 65. Calkins SD, Dedmon SE. Physiological and behavioral regulation in two-year-  
25 old children with aggressive/destructive behavior problems. *J Abnorm Child*  
26 *Psychol* 2000; **28**: 103-18.
- 27  
28 66. Gross D, Fogg L, Young M, et al. The equivalence of the child behavior  
29 checklist/ 1½-5 across race/ethnicity, income level, and language. *Psychol*  
30 *Assessment* 2006; **18**: 313-323.
- 31  
32 67. Mesman J, Bongers IL, Koot HM. Preschool development pathways to  
33 preadolescent internalizing and externalizing problems. *J Child Psychol*  
34 *Psychiatry* 2001; **42**: 679-89.
- 35  
36 68. Katwan E, Adnams C, London L. Childhood behavioural and developmental  
37 disorders associated with maternal alcohol consumption in Cape Town, South  
38 Africa. *S Afr Med J* 2011; **101**: 724-7.
- 39  
40  
41  
42  
43  
44  
45  
46  
47  
48  
49  
50  
51  
52  
53  
54  
55  
56  
57  
58  
59  
60



**Maternal posttraumatic stress disorder, depression and alcohol dependence and child behaviour outcomes in HIV infected mother-child dyads: a longitudinal study**

|                                 |                                                                                                                                                                                                                                                                                                                                                                                                                                                                                                                                                                  |
|---------------------------------|------------------------------------------------------------------------------------------------------------------------------------------------------------------------------------------------------------------------------------------------------------------------------------------------------------------------------------------------------------------------------------------------------------------------------------------------------------------------------------------------------------------------------------------------------------------|
| Journal:                        | <i>BMJ Open</i>                                                                                                                                                                                                                                                                                                                                                                                                                                                                                                                                                  |
| Manuscript ID:                  | bmjopen-2013-003638.R1                                                                                                                                                                                                                                                                                                                                                                                                                                                                                                                                           |
| Article Type:                   | Research                                                                                                                                                                                                                                                                                                                                                                                                                                                                                                                                                         |
| Date Submitted by the Author:   | 11-Nov-2013                                                                                                                                                                                                                                                                                                                                                                                                                                                                                                                                                      |
| Complete List of Authors:       | Nöthling, Jani; Stellenbosch University, Department of Psychiatry<br>Martin, Cherie; University of Ottawa, School of International Development and Global Studies<br>Laughton, Barbara; Stellenbosch University, Department of Paediatrics and Child Health, The Children's Infectious Diseases Clinical Research Unit (KID-CRU)<br>Cotton, Mark ; Stellenbosch University, Department of Paediatrics and Child Health, The Children's Infectious Diseases Clinical Research Unit (KID-CRU)<br>Seedat, Soraya; Stellenbosch University, Department of Psychiatry |
| <b>Primary Subject Heading</b>: | Mental health                                                                                                                                                                                                                                                                                                                                                                                                                                                                                                                                                    |
| Secondary Subject Heading:      | HIV/AIDS, Paediatrics                                                                                                                                                                                                                                                                                                                                                                                                                                                                                                                                            |
| Keywords:                       | Maternal mental health, Child behaviour and development , Posttraumatic Stress Disorder, Depression, Alcohol abuse, HIV/AIDS                                                                                                                                                                                                                                                                                                                                                                                                                                     |
|                                 |                                                                                                                                                                                                                                                                                                                                                                                                                                                                                                                                                                  |

SCHOLARONE™  
Manuscripts

1  
2  
3 **MATERNAL POSTTRAUMATIC STRESS DISORDER, DEPRESSION AND**  
4 **ALCOHOL DEPENDENCE AND CHILD BEHAVIOUR OUTCOMES IN HIV**  
5 **INFECTED MOTHER-CHILD DYADS: A LONGITUDINAL STUDY**  
6  
7  
8  
9

10  
11  
12  
13 Corresponding Author: Jani Nöthling, Stellenbosch University, Tygerberg Campus,  
14  
15 Department of Psychiatry, P.O. Box 19063, Tygerberg, 7505  
16  
17

18  
19 Jani Nöthling,<sup>1</sup> Cherie L Martin,<sup>2</sup> Barbara Laughton,<sup>3</sup> Mark F Cotton,<sup>3</sup>  
20  
21

22 Soraya Seedat<sup>1</sup>  
23  
24

25  
26 <sup>1</sup> Department of Psychiatry, Stellenbosch University, Cape Town, South Africa  
27

28 <sup>2</sup> School of International Development and Global Studies, University of Ottawa,  
29  
30 Ontario, Canada  
31

32 <sup>3</sup> Department of Paediatrics and Child Health, The Children's Infectious Diseases  
33  
34 Clinical Research Unit (KID-CRU), Stellenbosch University, Cape Town, South  
35  
36 Africa  
37  
38  
39  
40  
41  
42  
43  
44  
45  
46  
47  
48  
49  
50  
51  
52  
53  
54  
55  
56  
57  
58  
59  
60

## ABSTRACT

**Objectives:** HIV and psychiatric disorders are prevalent and often concurrent. Child-bearing women are at an increased risk for both HIV and psychiatric disorders, specifically depression and posttraumatic stress disorder (PTSD). Poor mental health in the peripartum period has adverse effects on infant development and behaviour. Few studies have investigated the relationship between maternal PTSD and child behaviour outcomes in an HIV vertically infected sample. The aim of this study was to investigate if maternal postpartum trauma exposure and PTSD were risk factors for child behaviour problems. Additionally, maternal depression, alcohol abuse and functional disability were explored as co-factors.

**Setting:** The study was conducted in Cape Town, South Africa.

**Participants:** Seventy mother-child dyads infected with HIV were selected from a group of participants recruited from Community Health Centers.

**Design:** The study followed a longitudinal design. Five measures were used to assess maternal trauma exposure, PTSD, depression, alcohol abuse and functional disability at 12 months postpartum: Life Events Checklist (LEC), Harvard Trauma Scale (HTS), Alcohol Use Disorders Identification Test (AUDIT), Center for Epidemiological Studies Depression Scale (CESD) and the Sheehan Disability Scale (SDS). Child behaviour was assessed at 42 months with the Child Behaviour Checklist (CBCL).

**Results:** The rate of maternal disorder was high with 50% scoring above the cut-off for depression, 22.9% for PTSD, and 7% for alcohol abuse. Half of children scored within the clinical range for problematic behaviour. Children of mothers with depression were significantly more likely to display total behaviour problems than children of mothers without depression. Maternal PTSD had the greatest explanatory power for child behaviour problems although it did not significantly predict child outcomes.

**Conclusion:** This study highlights the importance of identifying and managing maternal PTSD and depression in mothers of children infected with HIV. The relationship between maternal PTSD and child behaviour warrants further investigation.

## ARTICLE SUMMARY

### Article focus

- This study investigated maternal mental health (PTSD, trauma exposure, depression and alcohol abuse) at one year postpartum as a predictor of child behaviour problems at three and a half years of age in HIV infected, mother-child dyads.
- Self-reports were used to determine the prevalence of maternal psychiatric disorders and child behaviour problems in the dyads.

### Key Messages

- Maternal depression is associated with child behaviour problems in the general population as well as in this HIV infected sample.
- Prevalence of maternal depression and PTSD is high among mothers infected with HIV and prevalence of child behaviour problems is high among their infected children.
- The influence of maternal PTSD on child behaviour warrants further investigation.

### Strengths and limitations of the study

- This study is, to our knowledge, the first to investigate PTSD as a predictor of child behaviour in vertically transmitted, HIV infected, mother-child-dyads.
- The study employed a longitudinal design with the child participants being relatively healthy as indicated by immunological status.
- The sample size of the study may have reduced statistical power. Poor maternal physical health, change in child's medical treatment and change in caregiver may have biased the results..



## INTRODUCTION

The prevalence of psychiatric disorders in the general South African population is relatively high compared to other countries, with an estimated lifetime prevalence of 30.3% and 12-month prevalence of 16.5%. [1] Depression, alcohol abuse and posttraumatic stress disorder (PTSD) are commonly diagnosed disorders with a 12-month prevalence rate of 4.9%, 4.5% and 0.7% respectively. [1,2] Among South Africans, alcohol abuse has a lifetime prevalence rate of 11.4% followed by depression at 9.8% and PTSD at 2.3%. [1,2] Postpartum depression is also prevalent in South Africa. High prevalence rates of 28% and 34.7% have been reported among new mothers. [3]

In addition to high prevalence of psychiatric disorders, South Africa is overly burdened by HIV infection with a prevalence rate of 11%. [4] Common psychiatric disorders are often associated with HIV infection [5-8] with depression nearly twice as common in infected individuals. [6] One study documented a 19% prevalence of common psychiatric disorders among HIV infected South Africans, with 14% meeting criteria for depression, 5% for PTSD and 7% for alcohol dependence or abuse. [8] Individuals newly diagnosed with HIV are at an even higher risk for a common psychiatric disorder. [7] In addition, women are disproportionately and dually burdened by HIV and mood and anxiety disorders. Female gender is considered a risk factor for mood and anxiety disorders and for increased severity of these disorders. [1] Women, especially child-bearing women, are disproportionately affected by HIV. [3]

Poor maternal mental health is associated with adverse long-term effects in child development and behaviour. [9-15] Prevalence rates of 16% - 30% and 7% - 31% for externalising behaviour problems and internalising behaviour problems respectively have been identified among preschool children in low income families. [16] Internalising and externalising behaviour problems can persist into adolescence. For example, infant negative emotional reactivity and shyness have been associated with inhibition and withdrawal in early childhood and with anxiety symptoms in middle childhood and adolescence. [17] Negative reactivity, low persistence, aggression and school difficulties in childhood have also been associated with substance abuse in adolescence. [18]

Maternal depression, including postpartum depression, is linked to various forms of child and infant internalising and externalising behaviour problems, such as:

1  
2  
3 insecure attachment and less optimal mother-child interaction; [10,12,14] higher  
4 levels of tension and lower levels of emotional development; [9] low social  
5 competence and adaptive functioning [11]; poorer cognitive development; [9] lower  
6 competencies and general behaviour problems in boys; [10] and attention-deficit  
7 hyperactivity disorder. [14]

8  
9  
10  
11 Furthermore, children of mothers with comorbid PTSD and depression are  
12 significantly more likely to display internalising and externalising behaviour problems  
13 compared to children of mothers with depression only. [15] These children are more  
14 likely to display somatic symptoms and are more likely to be emotionally reactive,  
15 anxious/depressed and aggressive. [15] South Africa has a high rate of exposure to  
16 violence and traumatic events which increases risk for PTSD. [19] Prevalence of  
17 PTSD and trauma exposure is high among individuals infected with HIV, with female  
18 gender being a significant risk factor in this group. [5-8,20,21] Women infected with  
19 HIV are therefore at high risk of PTSD and their children are consequently at risk of  
20 behavioural and developmental problems.

21  
22  
23  
24  
25  
26  
27  
28 Maternal stress and anxiety is also linked to child behaviour problems.  
29 Various studies have investigated the negative effect of antenatal maternal stress on  
30 child development. [22] Fewer studies have focussed on postpartum maternal stress  
31 and anxiety and child behaviour outcomes. However, maternal stress and anxiety is  
32 negatively associated with parenting skills, and infant and child behaviour problems.  
33 [23-25] Maternal anxiety is a significant predictor of child attention and aggression  
34 problems [26] and maternal stress is significantly associated with child anxious and  
35 depressive symptoms. [27]

36  
37  
38  
39  
40  
41  
42  
43  
44  
45  
46  
47  
48  
49  
50  
51  
52  
53  
54 In addition to anxiety, PTSD and depression, maternal postpartum alcohol  
55 abuse/dependence has been associated with child and infant behaviour problems and  
56 developmental risk. [28-31] Alcohol abuse is one of the major contributors to disease  
57 burden in South Africa and antenatal alcohol abuse is associated with high rates of  
58 fetal alcohol spectrum disorders. [32-36] Child behaviour problems associated with  
59 parental postpartum alcohol abuse/dependence include: poor inhibitory control,  
60 attention shifting, distractibility, defiance, aggression, delinquency, emotional  
reactivity and withdrawal. [29,37]

To date, few studies have investigated the relationship between maternal  
postpartum trauma exposure, PTSD and child behaviour outcomes. None, to our  
knowledge, have examined this relationship in HIV-infected individuals, despite

1  
2  
3 evidence of high prevalence of PTSD in this group and its public health implications.  
4 This is of significant public health concern particularly in the South African context.  
5 The primary aim of this study was to investigate the impact of maternal trauma  
6 exposure and PTSD at a specific time point (12 months postpartum) and their  
7 association with child behaviour (at three and a half years of age) in mother-child  
8 dyads, infected with HIV, while controlling for the effects of depression. A secondary  
9 aim of the study was to investigate the relationship between maternal alcohol  
10 dependence/abuse, functional disability and child behaviour outcomes.  
11  
12  
13  
14  
15  
16

## 17 **METHODS**

### 18 **Participants**

19  
20 Seventy mother-child dyads infected with HIV participated in this study. Data was  
21 collected between 2006 and 2010. In eight cases, the maternal caregiver was not the  
22 child's biological mother. 'Maternal' or 'mother' within the context of this study  
23 therefore refers to either the biological mother or primary caregiver of the child. The  
24 child had to be in the care of the caregiver for at least six months prior to the  
25 assessments to qualify as a suitable participant. The mother-child dyads were selected,  
26 based on the completeness of their data, as a sub-group from the Children with HIV  
27 Early Antiretroviral Therapy (CHER) trial. HIV-infected infants entered the CHER  
28 trial at a mean of seven weeks of age and were randomised to early antiretroviral  
29 therapy for either 40 weeks or 96 weeks followed by planned treatment interruption or  
30 deferred therapy until meeting treatment guideline thresholds at that time; a CD4  
31 below 20% (25% in first year of life) or progression of HIV disease. The CHER study  
32 commenced in 2005 and ended in 2011. [38] The study was conducted in two South  
33 African sites, the Perinatal HIV Research Unit in Soweto and the Children's  
34 Infectious Diseases Clinical Research Unit (KID-CRU), in Tygerberg Children's  
35 Hospital, Cape Town. Participants were identified and recruited from local  
36 community health centres through HIV vertical transmission prevention programs. A  
37 neurodevelopmental sub-study was conducted in KID-CRU, and the data collected at  
38 this site was used in the current study.  
39  
40  
41  
42  
43  
44  
45  
46  
47  
48  
49  
50  
51  
52  
53  
54

### 55 **Study Design**

56 The neurodevelopmental sub-study reported herein was conducted over five years,  
57 and included all infants with birth weight >2000g and normal neurological  
58  
59  
60

1  
2  
3 examination before 12 weeks of age and excluded infants with CNS insults other than  
4 due to HIV. Maternal assessments were completed at 10-12 months and infant  
5 assessments at 42 months of age. The study under investigation was approved by the  
6 Health Research Ethics Committee of Stellenbosch University in Cape Town, South  
7 Africa (N05/07/113). The ethics committee granted a waiver of parental consent for  
8 participants who were less than 18 years of age.  
9  
10  
11  
12

### 13 14 15 **Procedures**

16 Informed consent was obtained from all mothers of infants (aged 16 years and older)  
17 infected with HIV, in their preferred language (English, Afrikaans or isiXhosa).  
18 Maternal participants completed a series of questionnaires including a demographic  
19 questionnaire, the Life Events Checklist (LEC), the Harvard Trauma Scale (HTS), the  
20 Alcohol Use Disorder Identification Test (AUDIT), the Center for Epidemiologic  
21 Studies Depression Scale (CESD), and the Sheehan Disability Scale (SDS). The same  
22 battery of questionnaires was completed at five different time points over the course  
23 of five years. The assessments completed at 12 months postpartum were used in the  
24 current analysis. This was deemed a salient period for examining PTSD in new  
25 mothers and was intended to decrease the risk of confounding by postpartum  
26 depression, as the risk for postpartum depression is highest within the first year after  
27 giving birth. The self-report measures were verbally administered in Afrikaans and  
28 English by a trained research psychologist. A trained research assistant was used for  
29 Xhosa-speaking mothers.  
30  
31  
32  
33  
34  
35  
36  
37  
38  
39

40 Child behaviour was assessed at 42 months postpartum using the Child  
41 Behaviour Checklist (CBCL). This time point was selected based on completeness of  
42 data and in an effort to measure the long-term effects of maternal mental health. The  
43 mother or caregiver of the child completed the CBCL. The CBCL was administered  
44 by a research assistant if the mothers were illiterate or had difficulty completing the  
45 assessment. Immunodeficiency in children was measured using CD4 percentages and  
46 absolute scores. Immunodeficiency was determined in according to the World Health  
47 Organisation's guidelines on the classification of HIV associated immunodeficiency  
48 in children. [39] The CD4 counts and percentages of children were determined on a  
49 regular basis, but viral loads were only determined if there were concerns about  
50 treatment failure. Maternal CD4 counts and viral loads were not assessed as mothers  
51 were not receiving treatment at the same facility as the children.  
52  
53  
54  
55  
56  
57  
58  
59  
60

## Measures

### Demographic Questionnaire

Biographical information regarding maternal age, ethnicity, language, marital status, education, annual household income, employment status and gender of the child was determined through a demographic questionnaire. The relationship of the caregiver to the child was also obtained.

### Life Events Checklist

Traumatic life events were measured using the Life Events Checklist (LEC) The Life Events Checklist is a 16-item self-report questionnaire assessing the incidence of 16 different categories of traumatic events including physical assault, life threatening illness, natural disasters, sexual assault, and sudden unexpected death of a loved one. Participants had three optional responses to each item; direct 'happened to me', indirect 'witnessed it', and removed 'heard about it'. A score was then tallied for the total number of direct Life Events. Respondents who reported directly experienced trauma were asked to complete the Harvard Trauma Scale.

### Harvard Trauma Scale

The Harvard Trauma Scale (HTS) is a 30-item, self-report questionnaire designed to screen for the presence of PTSD in cross-cultural populations. [40] Examples of items include 'feeling as though the event is happening again' and 'nightmares about the event that keep coming back'. Symptoms are reported on a four point Likert scale ranging from "not at all" to "extremely", with a total score range of 30 to 120. The cut-off score indicative of PTSD is 75 or higher. The HTS has shown strong test-retest reliability in a South African, adolescent sample. [41]

### Alcohol Use Disorders Identification Test

Alcohol dependence and abuse were measured using the Alcohol Use Disorders Identification Test (AUDIT). The 10-item questionnaire assesses alcohol dependence and abuse and is scored on a five point Likert scale from "never" to "daily or almost daily". The cut-off score is set at eight for alcohol abuse and 13 or more for alcohol dependence. The AUDIT is a reliable measure developed by the World Health Organisation and has been implemented and tested internationally. [42] It has been

1  
2  
3 applied in a variety of settings and cultures [43-45-] including Mexico, [46]  
4 Venezuela, [47] Hong Kong, [48] Zimbabwe [49] and in South Africa with HIV-  
5 infected patients. [50,51] In each of these studies the AUDIT outperformed other self-  
6 report measures in the identification of alcohol abuse and dependence.  
7  
8

#### 9 10 11 Center for Epidemiological Studies Depression Scale

12 The Center for Epidemiological Studies Depression Scale (CESD) is a self-report  
13 measure to screen for depression. The CESD is a 20-item scale that assesses current  
14 levels of depression as per DSM-IV criteria. Responses are measured on a four point  
15 Likert scale ranging from “rarely or none of the time” to “most or all of the time”. A  
16 score of 16 or more is considered indicative of depression. The CESD has been  
17 validated for clinic and community settings to detect depressive symptoms [52-54]  
18 and in many cross-cultural samples [55-57] and across ethnic groups. [58,59] The  
19 CESD has been used to measure depression in several clinic samples of individuals  
20 infected with HIV. [60-63]  
21  
22  
23  
24  
25  
26  
27  
28

#### 29 30 The Sheehan Disability Scale

31 The Sheehan Disability Scale (SDS) is a self-report measure used to evaluate patients’  
32 functional impairment in relation to self-reported symptoms. [64] Functional  
33 disability is assessed across three core areas, namely, work/school, social life, and at  
34 home/family responsibilities. Functioning is reported on a visual analogue scale  
35 ranging from zero to ten. Higher scores indicate greater impairment and disability.  
36 The SDS is frequently used in clinical trials in psychiatry and has shown good  
37 reliability in an HIV infected, South African sample. [65]  
38  
39  
40  
41  
42  
43  
44

#### 45 46 The Child Behaviour Checklist

47 Child behaviour problems were assessed using the preschool version of the Child  
48 Behaviour Checklist (CBCL). [66] The CBCL is a 100 item self-report questionnaire,  
49 usually completed by a parent or caregiver. The items are scored on a three point  
50 Likert scale ranging from “not true” to “very true or often true”. Behavioural  
51 problems are measured in eight domains, namely, emotionally reactive,  
52 anxious/depressed, somatic complaints, withdrawn behaviour, sleep problems,  
53 common/non-specific problems, attention problems and aggressive behaviour. The  
54 first four domains are viewed as internalising behaviour problems, the last two  
55  
56  
57  
58  
59  
60



1  
2  
3 domains are viewed as externalising behaviour problems and all of the domains  
4 combined are viewed as total behaviour problems. The CBCL is a widely used  
5 behavioural checklist with good reliability and validity in a variety of cultural and  
6 language settings. [67-69]  
7  
8  
9

### 10 11 **Data analysis**

12 All analyses were performed using Statistical Analysis Software (SAS) and SPSS  
13 version 20. Descriptive statistics were computed for the demographic characteristics  
14 of the sample as well as the prevalence rates of maternal mental health problems and  
15 child behavioural problems. Differences in behaviour problems between children of  
16 mothers with and without PTSD, depression and alcohol abuse were analysed by  
17 means of t-tests. Linear regression analysis was performed to determine if maternal  
18 mental status was a significant predictor of child behaviour outcomes. Of particular  
19 interest was the influence of trauma exposure and PTSD on child behaviour  
20 outcomes. Depression was controlled for due to previous studies reporting a  
21 relationship between depression and child behaviour problems.  
22  
23  
24  
25  
26  
27  
28  
29

30 Three models were run with the following continuous outcome variables as  
31 measured by the CBCL: total child behavioural problems (internalising, externalising  
32 and sleep problems), child internalising behaviour problems and child externalising  
33 behaviour problems. The same continuous predictor variables were used in all three  
34 regression models. The predictor variables were: exposure to traumatic life events  
35 (LE), PTSD symptomatology (HTS), alcohol abuse/dependence (AUDIT), depression  
36 (CESD) and functional disability (SDS).  
37  
38  
39  
40  
41  
42

## 43 **RESULTS**

### 44 **Sample demographics**

45 The sample included 70 mother-child dyads, each being HIV-infected. The mean age  
46 of the mothers/caregivers at 12 months postpartum was 28.8 (range: 16-64) years. The  
47 mother-child dyads were mainly black (88.6%) and Xhosa speaking (65.7%). The  
48 mothers were mostly single (64.3%) and unemployed (80.9%). The majority of  
49 mothers had some secondary schooling (58.6%) with an annual income below  
50 R10 000 (72.9%, US\$1038). Thirty-six children (51%) were female. The majority of  
51 caregivers at 10 to 12 months (94.3%) and 42 months (91.4%) were the biological  
52 mothers of the children, however there were eight changes in caregiver from 12  
53  
54  
55  
56  
57  
58  
59  
60

months postpartum to 42 months postpartum. Reasons for change in caregiver included: mother passed away (n = 3), mother was unavailable on the day of assessment (n = 2), and the person attending lived with the child and was closely involved in caring for the child (n = 3).

The prevalence of infant immunodeficiency was relatively high at 10 to 12 months postpartum with 47.1% (range: 15.4%-54.5%) and 40% (range: 574-3777) showing mild to severe immunodeficiency based on CD4 percentages and absolute counts respectively. At 42 months, the majority of the children did not have CD4 percentages (91.4%, range: 16.3%-53.6%) or absolute counts (100%, range: 468-3267) indicative of immunodeficiency. The demographic and biological information of participants are presented in Table 1.

Table 1  
*Demographic layout of the sample*

|                                                                     | N  | %    | M    |
|---------------------------------------------------------------------|----|------|------|
| Relationship of carer to child at 12 months postpartum <sup>1</sup> | 70 |      |      |
| Mother                                                              | 66 | 94.3 |      |
| Grandmother                                                         | 2  | 2.9  |      |
| Aunt                                                                | 1  | 1.4  |      |
| Guardian                                                            | 1  | 1.4  |      |
| Relationship of carer to child at 42 months postpartum <sup>2</sup> | 70 |      |      |
| Mother                                                              | 64 | 91.4 |      |
| Grandmother                                                         | 5  | 7.1  |      |
| Aunt                                                                | 1  | 1.4  |      |
| Age of mother/caregiver <sup>1</sup>                                | 70 |      | 28.8 |
| Gender of child <sup>1</sup>                                        | 70 |      |      |
| Male                                                                | 34 | 48.6 |      |
| Female                                                              | 36 | 51.4 |      |
| Language <sup>1</sup>                                               | 70 |      |      |
| Afrikaans                                                           | 9  | 12.9 |      |
| English                                                             | 15 | 21.4 |      |



|                                                             |    |      |        |
|-------------------------------------------------------------|----|------|--------|
| Xhosa                                                       | 46 | 65.7 |        |
| Ethnicity <sup>1</sup>                                      | 70 |      |        |
| Black                                                       | 62 | 88.6 |        |
| Coloured                                                    | 3  | 4.3  |        |
| White                                                       | 4  | 5.7  |        |
| Asian                                                       | 1  | 1.4  |        |
| Marital Status <sup>1</sup>                                 | 70 |      |        |
| Single                                                      | 45 | 64.3 |        |
| Married/living with a partner                               | 23 | 32.9 |        |
| Divorced/separated                                          | 2  | 2.9  |        |
| Annual Income <sup>1</sup>                                  | 70 |      |        |
| < R10 000                                                   | 51 | 72.9 |        |
| R 10 000 – R20 000                                          | 11 | 15.7 |        |
| R 20 000 – R 40 000                                         | 2  | 2.9  |        |
| R 40 000 – R 60 000                                         | 0  | 0    |        |
| R 60 000 – R 100 000                                        | 1  | 1.4  |        |
| > R 100 000                                                 | 0  | 0    |        |
| Level of Education <sup>1</sup>                             | 70 |      |        |
| No schooling                                                | 0  | 0    |        |
| Some primary schooling                                      | 7  | 10   |        |
| Completed primary school                                    | 3  | 4.3  |        |
|                                                             | N  | %    | M      |
| Some secondary schooling                                    | 41 | 58.6 |        |
| Grade 12 completed                                          | 18 | 25.7 |        |
| Higher education completed                                  | 1  | 1.4  |        |
| Employment Status <sup>1</sup>                              | 68 |      |        |
| Employed                                                    | 13 | 19.1 |        |
| Unemployed                                                  | 55 | 80.9 |        |
| Immunodeficiency (CD4 percentage) of child <sup>1</sup>     | 70 |      | 36.1   |
| Not significant (>30%)                                      | 37 | 52.9 |        |
| Mild (25-30%)                                               | 15 | 21.4 |        |
| Advanced (20-24%)                                           | 12 | 17.1 |        |
| Severe (<20%)                                               | 6  | 8.6  |        |
| Immunodeficiency (CD4 absolute score) of child <sup>1</sup> | 70 |      | 1862.6 |
| Not significant                                             | 42 | 60   |        |
| Significant (<750)                                          | 28 | 40   |        |
| Immunodeficiency (CD4 percentage) of child <sup>2</sup>     |    |      | 34.3   |
| Not significant (>25%)                                      | 64 | 91.4 |        |
| Mild (20-25%)                                               | 4  | 5.7  |        |
| Advanced (15-19%)                                           | 2  | 2.9  |        |
| Severe (<15%)                                               | 0  | 0    |        |

|                                                             |    |     |        |
|-------------------------------------------------------------|----|-----|--------|
| Immunodeficiency (CD4 absolute count) of child <sup>2</sup> |    |     | 1374.2 |
| Not significant                                             | 70 | 100 |        |
| Significant (<350)                                          | 0  | 0   |        |

<sup>1</sup>Data recorded at 12 months postpartum

<sup>2</sup>Data recorded at 42 months postpartum

### Prevalence of maternal psychiatric disorders and child behaviour problems

The prevalence rate for all measured maternal psychiatric disorders (based on self-report data) was 27.6%. Depression was the most prevalent disorder at 50% (n = 35), followed by PTSD with 22.9% (n = 16), alcohol abuse with 7.1% (n = 5) and alcohol dependence with 2.9% (n = 2). A large proportion of children scored within the clinical range for problematic behaviour with a prevalence rate of 44.3% (n = 31) for total behaviour problems. Internalising behaviour problems were most prevalent with 50% of children scoring above cut-off. The most common internalising behaviour problems were somatic complaints (n = 28), followed by withdrawn behaviour (n = 20), emotional reactivity (n = 15) and anxious/depressed behaviour (n = 10). Externalising behavioural problems were less prevalent with 30% (n = 21) of children scoring within the clinical range. Aggressive behaviour (n = 12) was the most common externalising behaviour problem followed by attention problems (n = 8). Sleeping problems (n = 3) was the least common behaviour problem (see Table 2).

Table 2

*Descriptive statistics for maternal mental health and child behaviour problems*

|                                                    | M     | SD    | <u>Above cut-off</u> |      |
|----------------------------------------------------|-------|-------|----------------------|------|
|                                                    |       |       | N                    | %    |
| Directly experienced life events (LE) <sup>1</sup> | 2.36  | 2.13  |                      |      |
| Substance abuse (AUDIT) <sup>1</sup>               | 1.30  | 3.45  |                      |      |
| Hazardous drinking                                 |       |       | 5                    | 7.1  |
| Alcohol dependence                                 |       |       | 2                    | 2.9  |
| Depression (CESD) <sup>1</sup>                     | 17.40 | 14.05 | 35                   | 50   |
| Posttraumatic Stress Disorder (HTS) <sup>1</sup>   | 59.67 | 21.36 | 16                   | 22.9 |
| Functional disability (SDS) <sup>1</sup>           | 7.11  | 6.75  |                      |      |

|                                                      |       |       |    |      |
|------------------------------------------------------|-------|-------|----|------|
| Total behaviour problems (CBCL) <sup>2 3</sup>       | 46.41 | 29.30 | 31 | 44.3 |
| Sleep                                                | 3.16  | 2.67  | 3  | 4.3  |
| Internalising behaviour problems (CBCL) <sup>2</sup> | 14.67 | 11.07 | 35 | 50.0 |
| Emotional reactive                                   | 3.20  | 3.39  | 15 | 21.4 |
| Anxious/depressed                                    | 3.73  | 2.85  | 10 | 14.3 |
| Somatic                                              | 4.61  | 3.57  | 28 | 40.0 |
| Withdrawn                                            | 3.13  | 3.02  | 20 | 28.6 |
| Externalising behaviour problems (CBCL) <sup>2</sup> | 14.59 | 9.07  | 21 | 30.0 |
| Attention                                            | 2.74  | 1.97  | 8  | 11.4 |
| Aggression                                           | 11.84 | 7.77  | 12 | 17.1 |

<sup>1</sup>Maternal measures

<sup>2</sup>Child measures

<sup>3</sup>Total behaviour problems comprise of internalising behaviour problems, externalising behaviour problems and sleeping problems.

### Maternal mental health as a predictor of child behaviour outcomes

The children of mothers with depression ( $M = 53.74$ ,  $SE = 28.53$ ) were significantly more likely to display behaviour problems  $t(68) = 2.15$ ,  $p = .035$ , compared to the children of mothers without depression ( $M = 39.09$ ,  $SE = 28.59$ ). The children of mothers meeting criteria for PTSD ( $M = 54.06$ ,  $SE = 18.97$ ) were more likely to display behaviour problems compared to the children of mothers who did not meet criteria for PTSD ( $M = 44.25$ ,  $SE = 30.76$ ), but this was not a significant effect  $t(58) = 1.19$ ,  $p = .238$ . The children of mothers who abused alcohol ( $M = 52.60$ ,  $SE = 24.52$ ) were also more likely to display behaviour problems, compared to the children of mothers who did not abuse alcohol ( $M = 45.94$ ,  $SE = 29.74$ ), but this effect was also not significant  $t(68) = .49$ ,  $p = .628$  (see table 3).

Table 3

*Comparison of CBCL scores for child behaviour problems based on maternal mental status*

|                                        | M     | SD    | Df | t    | p    |
|----------------------------------------|-------|-------|----|------|------|
| Maternal depression (CESD)             |       |       | 68 | 2.15 | .035 |
| Children of mothers with depression    | 53.74 | 28.53 |    |      |      |
| Children of mothers without depression | 39.09 | 28.59 |    |      |      |
| Maternal PTSD (HTS)                    |       |       | 58 | 1.19 | .238 |
| Children of mothers with PTSD          | 54.06 | 18.97 |    |      |      |
| Children of mothers without PTSD       | 44.25 | 30.76 |    |      |      |

|    |                                      |       |       |          |
|----|--------------------------------------|-------|-------|----------|
| 1  |                                      |       |       |          |
| 2  |                                      |       |       |          |
| 3  |                                      |       |       |          |
| 4  | Maternal alcohol abuse (AUDIT)       |       | 68    | .49 .628 |
| 5  | Children of mother who abuse alcohol | 52.60 | 24.52 |          |
| 6  | Children of mothers who do not abuse | 45.94 | 29.74 |          |
| 7  | Alcohol                              |       |       |          |
| 8  |                                      |       |       |          |
| 9  |                                      |       |       |          |
| 10 |                                      |       |       |          |
| 11 |                                      |       |       |          |
| 12 |                                      |       |       |          |
| 13 |                                      |       |       |          |
| 14 |                                      |       |       |          |
| 15 |                                      |       |       |          |
| 16 |                                      |       |       |          |
| 17 |                                      |       |       |          |
| 18 |                                      |       |       |          |
| 19 |                                      |       |       |          |
| 20 |                                      |       |       |          |
| 21 |                                      |       |       |          |
| 22 |                                      |       |       |          |
| 23 |                                      |       |       |          |
| 24 |                                      |       |       |          |
| 25 |                                      |       |       |          |
| 26 |                                      |       |       |          |
| 27 |                                      |       |       |          |
| 28 |                                      |       |       |          |
| 29 |                                      |       |       |          |
| 30 |                                      |       |       |          |
| 31 |                                      |       |       |          |
| 32 |                                      |       |       |          |
| 33 |                                      |       |       |          |
| 34 |                                      |       |       |          |
| 35 |                                      |       |       |          |
| 36 |                                      |       |       |          |
| 37 |                                      |       |       |          |
| 38 |                                      |       |       |          |
| 39 |                                      |       |       |          |
| 40 |                                      |       |       |          |
| 41 |                                      |       |       |          |
| 42 |                                      |       |       |          |
| 43 |                                      |       |       |          |
| 44 |                                      |       |       |          |
| 45 |                                      |       |       |          |
| 46 |                                      |       |       |          |
| 47 |                                      |       |       |          |
| 48 |                                      |       |       |          |
| 49 |                                      |       |       |          |
| 50 |                                      |       |       |          |
| 51 |                                      |       |       |          |
| 52 |                                      |       |       |          |
| 53 |                                      |       |       |          |
| 54 |                                      |       |       |          |
| 55 |                                      |       |       |          |
| 56 |                                      |       |       |          |
| 57 |                                      |       |       |          |
| 58 |                                      |       |       |          |
| 59 |                                      |       |       |          |
| 60 |                                      |       |       |          |

Table 4 presents the results of the regression analyses with predictor variables, their standardized coefficients and significance levels for the outcome variables: child total behaviour problems (Model 1), child internalising behaviour problems (Model 2) and child externalising behaviour problems (Model 3). Table 5 presents the summary statistics for the regression analysis.

Table 4  
Parameters for the variables predicting child behaviour outcomes (N=59)

| Model |                                   | Unstandardised |            | Standardised Beta coefficients | t     | Sig. | 95% Confidence Interval |             |
|-------|-----------------------------------|----------------|------------|--------------------------------|-------|------|-------------------------|-------------|
|       |                                   | $\beta$        | Std. error |                                |       |      | Lower limit             | Upper limit |
| 1     | Total problems (Constant)         | 26.02          | 11.49      |                                | 2.27  | .028 | 4.33                    | 47.71       |
|       | Traumatic life events (LE)        | -1.79          | 1.91       | -.13                           | -.94  | .352 | -5.40                   | 1.81        |
|       | Alcohol dependance/abuse (AUDIT)  | -.14           | 1.07       | -.02                           | -.13  | .894 | -2.16                   | 1.87        |
|       | Depression (CESD)                 | .20            | .33        | .10                            | .61   | .546 | -.42                    | .82         |
|       | Functional disability (SDS)       | .24            | .60        | .06                            | .40   | .688 | -.89                    | 1.38        |
|       | PTSD (HTS)                        | .35            | .26        | .27                            | 1.38  | .173 | -.13                    | 0.83        |
| 2     | Internalising problems (Constant) | 8.14           | 4.30       |                                | 1.89  | .064 | .02                     | 16.27       |
|       | Traumatic life events (LE)        | -1.18          | .72        | -.23                           | -1.64 | .106 | -2.53                   | .18         |
|       | Alcohol dependance/abuse (AUDIT)  | -.39           | .40        | -.13                           | -.99  | .328 | -1.15                   | .36         |
|       | Depression (CESD)                 | .14            | .12        | .19                            | 1.12  | .268 | -.09                    | .37         |
|       | Functional disability (SDS)       | .06            | .22        | .04                            | .28   | .781 | -.36                    | .49         |
|       | PTSD (HTS)                        | .12            | .10        | .24                            | 1.29  | .203 | -.06                    | .30         |
| 3     | Externalising problems (Constant) | 6.05           | 3.62       |                                | 1.67  | .100 | -.78                    | 12.88       |
|       | Traumatic life events (LE)        | -.15           | .60        | -.03                           | -.25  | .807 | -1.28                   | .99         |
|       | Alcohol dependance/abuse (AUDIT)  | .37            | .34        | .15                            | 1.12  | .270 | -.26                    | 1.01        |
|       | Depression (CESD)                 | .01            | .10        | .02                            | .11   | .909 | -.18                    | .21         |
|       | Functional disability (SDS)       | .02            | .19        | .01                            | .08   | .936 | -.34                    | .37         |
|       | PTSD (HTS)                        | .14            | .08        | .34                            | 1.79  | .079 | -.01                    | .30         |

1. Outcome: total child behaviour problems (CBCL)
2. Outcome: internalising child behaviour problems (CBCL)
3. Outcome: externalising child behaviour problems (CBCL)

Table 5  
 Model summary predicting child behaviour problems

| Model | R <sup>2</sup> | ΔR <sup>2</sup> | F    | df1 | df2 | p    |
|-------|----------------|-----------------|------|-----|-----|------|
| 1     | .119           | .036            | 1.44 | 5   | 53  | .227 |
| 2     | .150           | .070            | 1.88 | 5   | 53  | .114 |
| 3     | .147           | .067            | 1.83 | 5   | 53  | .123 |

1. Predictors: maternal traumatic life events (LE), maternal alcohol dependence/abuse (AUDIT), maternal depression (CESD), maternal functional disability (SDS), maternal PTSD (HTS). Outcome: total child behaviour problems (CBCL)
2. Predictors: maternal traumatic life events (LE), maternal alcohol dependence/abuse (AUDIT), maternal depression (CESD), maternal functional disability (SDS), maternal PTSD (HTS). Outcome: internalising child behaviour problems (CBCL)
3. Predictors: maternal traumatic life events (LE), maternal alcohol dependence/abuse (AUDIT), maternal depression (CESD), maternal functional disability (SDS), maternal PTSD (HTS). Outcome: externalising child behaviour problems (CBCL)

The linear combination of maternal variables, namely, traumatic life events, PTSD, depression, alcohol dependence/abuse and functional disability explained 3.63% of the variance in total child behaviour problems in model 1. The amount of variance explained was not significant  $F(5,53) = 1.44, p = .226$ . None of the predictor variables significantly contributed to predicting child behaviour problems within this model. Maternal PTSD  $\beta = .35, t(59) = 1.38, p = .173$  made the largest contribution to explaining child total behaviour problems, based on standardised beta coefficients and significance levels, followed by traumatic life events  $\beta = -1.79, t(59) = -.94, p = .352$ , depression  $\beta = .20, t(59) = .61, p = .546$ , disability in functioning  $\beta = .24, t(59) = .40, p = .688$  and alcohol dependence/abuse  $\beta = -.14, t(59) = -.13, p = .894$ .

The linear combination of the maternal variables in model 2 explained 7.02% of the variance in child internalising behaviour problems. The amount of variance explained in this model was also not significant  $F(5,53) = 1.44, p = .226$ . None of the predictor variables significantly contributed to predicting child internalising behaviour problems. Maternal PTSD  $\beta = .12, t(59) = 1.29, p = .203$  made the largest contribution to explaining child internalising behaviour problems, based on standardised Beta coefficients, followed by traumatic life events  $\beta = -1.18, t(59) = -1.64, p = .106$ , depression  $\beta = .14, t(59) = 1.12, p = .268$ , alcohol dependence/abuse  $\beta = -.39, t(59) = -.99, p = .328$  and functional disability  $\beta = .06, t(59) = .28, p = .781$ .

1  
2  
3 Maternal variables explained 6.66% of the variance in child externalising  
4 behaviour problems in model 3 and the variance explained was once again not  
5 significant  $F(5,53) = 1.83, p = .123$ . None of the predictor variables significantly  
6 contributed to explaining child externalising behaviour problems. Maternal PTSD  $\beta =$   
7  
8  
9  
10  
11  
12  
13  
14  
15  
16  
17  
18  
19  
20  
21  
22  
23  
24  
25  
26  
27  
28  
29  
30  
31  
32  
33  
34  
35  
36  
37  
38  
39  
40  
41  
42  
43  
44  
45  
46  
47  
48  
49  
50  
51  
52  
53  
54  
55  
56  
57  
58  
59  
60  
Maternal PTSD  $\beta = .14, t(59) = 1.79, p = .079$  made the largest contribution, based on standardised beta coefficients and significance levels, followed by alcohol dependence/abuse  $\beta = .37, t(59) = 1.12, p = .270$ , traumatic life events  $\beta = -.15, t(59) = -.25, p = .807$ , depression  $\beta = .01, t(59) = .11, p = .909$  and functional disability  $\beta = .02, t(59) = .08, p = .936$ .

## DISCUSSION

The present study examined the long term effects of maternal mental health and child behaviour outcomes in a sample of mother-child dyads infected with HIV. Firstly, we found that maternal mental disorders and child behaviour problems were common among HIV infected mothers and vertically infected children. The overall prevalence of maternal psychiatric disorders, based on self-report data, was 27.6%. Previous studies have reported prevalence rates of 19% to 56% among HIV infected samples. [5-8] Half of mothers in this study scored above the cut-off for depression, followed by 22.9% for PTSD, 7.1% for alcohol abuse and 2.9% for alcohol dependence. Previous studies similarly have reported high prevalence rates, among samples infected with HIV, for depression (14% - 36%), PTSD (5% - 14.8%) and alcohol dependence (7%). [5-8] The results of this study revealed even higher prevalence rates for depression and PTSD and lower prevalence rates for alcohol dependence.

The prevalence of psychiatric disorder was also considerably higher than rates documented in the general South African population [1] Previous studies have found a high prevalence (28%-34.7%) for postpartum depression in low income populations in South Africa. We found a higher prevalence rate of 50% among this sample for depression. The added emotional and physical load of HIV infection and caring for a child infected with HIV seems to contribute considerably to psychiatric disease burden. The high prevalence rate of psychiatric disorder, especially PTSD, could possibly be biased by female gender, a previously identified risk factor for PTSD in HIV infected individuals. [20] The low rate of alcohol dependence might be due to the use of prenatal alcohol exposure as an exclusion criterion for participation in the study.



1  
2  
3 A high rate of child behaviour problems (44.3% for total behaviour problems)  
4 was also found. The prevalence rate for internalising and externalising behaviour  
5 problems, which fell within the clinical range, was 50% and 30% respectively. The  
6 prevalence rate of externalising behaviour problems is considerably higher than  
7 previously reported rates of 16%-30%. The prevalence rate for internalising behaviour  
8 problems corresponds with those identified in previous studies (7%-31%). The  
9 children in this sample are therefore at greater risk of displaying externalising  
10 behaviour problems and consequently psychiatric disorders associated with  
11 externalising behaviour problems later in life. [17,16]

12  
13  
14  
15  
16  
17  
18 Second, children of mothers with depression were significantly more likely to  
19 exhibit behaviour problems than the children of mothers without depression, although  
20 this association was not significant for maternal PTSD or alcohol abuse/dependence.  
21 Various studies have found significant links between maternal depression and  
22 internalising and externalising child behaviour problems. [9-12,14] Fatigue and  
23 emotional burnout associated with depression may lead to poor mother-child  
24 interaction in early infancy and consequently to insecure infant attachment and  
25 behavioural problems [3,70]. The added burden of caring for an ill child, guilt  
26 associated with transmission of HIV to the child and stressors associated with living  
27 in poverty may further intensify depressive symptoms. [71,72] The relationship  
28 between maternal depression and child behaviour problems was investigated in this  
29 study in an effort to control for the probable shared variance between depression and  
30 PTSD. Depression was not a significant predictor within the regression models of  
31 total behaviour problems, internalising or externalising behaviour problems.

32  
33  
34  
35  
36  
37  
38  
39  
40  
41 Third, maternal trauma exposure, PTSD, depression, alcohol  
42 abuse/dependence and functional disability did not significantly predict child  
43 behaviour outcomes. However, PTSD made the largest contribution in predicting  
44 internalising, externalising and total behaviour problems. This relationship between  
45 PTSD and child behaviour problems warrants further investigation. Similar results  
46 have been reported, a significant association has been found between maternal stress  
47 and anxiety and child internalising and externalising problems. [26,27] The children  
48 of mothers with comorbid PTSD and depression also have an increased risk for  
49 internalising and externalising behaviour problems, compared to mothers with  
50 depression alone or no disorder. [15] Similar to depression, maternal PTSD may lead  
51 to poor mother child interaction. Parental anxiety is associated with an overinvolved  
52  
53  
54  
55  
56  
57  
58  
59  
60



1  
2  
3 parenting style and negative parental attitudes during interaction with children. [73]  
4 Children may model parent's anxious behaviour; parental vigilance, intrusion and  
5 discouragement of independent problems solving may lead to a limited sense of  
6 competence and autonomy in the children which, in turn, can lead to anxiety within  
7 the child. [74] Maternal antenatal anxiety may have adverse consequences on child  
8 neurodevelopment and subsequent behavioural and emotional problems. [75] While  
9 previous studies have found significant associations between parental (specifically  
10 maternal) alcohol abuse and child developmental and behaviour problems, [37,76] in  
11 the present study no significant relationship was found between alcohol  
12 dependence/abuse, functional disability and child behavioural outcomes in regression  
13 analyses.

14  
15  
16  
17  
18  
19  
20  
21 A number of study limitations deserve mention. In eight cases, there was a change in  
22 the caregiver completing the maternal assessment at 12 months compared with the  
23 caregiver completing the child assessment at 42 months. The change in caregiver may  
24 have, in itself, contributed to behaviour problems, Caregivers may have had a limited  
25 sense of the child's temperament (owing to the short period of caring for the child)  
26 leading to inaccurate representation of the child's behaviour. Several confounding  
27 factors, apart from maternal mental health, may have influenced child behaviour  
28 problems. Maternal physical health, child physical health, change in child's  
29 medication (assigned treatment arm), socio-economic stressors and parenting styles  
30 were not measured in this study and may have contributed to child behaviour  
31 problems. Future studies should assess these factors as potential confounders.  
32  
33 Maternal mental health at only one time point (12 months postpartum) was included  
34 in this analysis. Intervening maternal and/or child factors e.g. effects of HIV-related  
35 CNS infections or encephalopathy on the developing brain between 12 and 42 months  
36 may have contributed to child behavioural outcomes.

37  
38  
39  
40  
41  
42  
43  
44  
45  
46 More than one administrator was used which may have caused inconsistency  
47 in the administration of self-reports. Maternal mental state and child behaviour  
48 outcomes were measured using self-reports and not a clinician diagnosis. The mental  
49 state of the caregivers may have contributed to biased perceptions of child behaviour  
50 being endorsed. Only 70 mother-child dyads participated in the study and 11 of the 70  
51 were excluded from the regression analysis owing to missing data. The small sample  
52 size may have compromised statistical power for the analyses. Lastly, there was no  
53 HIV negative control or comparator group.  
54  
55  
56  
57  
58  
59  
60

1  
2  
3  
4  
5  
6  
7  
8  
9  
10  
11  
12  
13  
14  
15  
16  
17  
18  
19  
20  
21  
22  
23  
24  
25  
26  
27  
28  
29  
30  
31  
32  
33  
34  
35  
36  
37  
38  
39  
40  
41  
42  
43  
44  
45  
46  
47  
48  
49  
50  
51  
52  
53  
54  
55  
56  
57  
58  
59  
60

Nevertheless, several characteristics of the sample distinguish this study from previous research samples. This is, to our knowledge, the first study investigating the predictive effect of PTSD on child behaviour in vertically transmitted, HIV infected children. The study followed a longitudinal design and investigated the long-term child outcomes of maternal mental health at a specific point in time. Biological markers (e.g. CD4 counts) indicated that the children were relatively healthy at the time of assessment thus minimizing the possibility of poor physical health being a confounding factor. All mother-child dyads had routine checkups, counseling, HIV information sessions and antiretroviral treatment available to them. The level of intervention and care provided may have contributed positively to maternal mental health and child behaviour outcomes and requires further investigation. Findings of this study highlight the need to screen for and manage maternal PTSD and depression in mothers-child dyads infected with HIV. Identifying the mechanisms by which maternal mental health variables, specifically PTSD, interact and function in relation to child development in vertically transmitted HIV also requires exploration in future larger sample longitudinal studies.

### **Acknowledgements**

We thank the parents and children taking part in the study and the KID-CRU personnel. Thanks to Lungiswa Rosy Khethelo and Marina Basson for assistance with data collection and to Justin Harvey for assistance with the data analysis.

### **Funding**

Support for this study was provided by the US National Institute of Allergy and Infectious Diseases (NIAID) through the CIPRA network, Grant U19 AI53217; the Departments of Health of the Western Cape and Gauteng, South Africa; and GlaxoSmithKline. Additional support was provided with Federal funds from the National Institute of Allergy and Infectious Diseases, National Institutes of Health, United States Department of Health and Human Services, under Contract No. HHSN272200800014C. The views expressed in written conference materials or publications and by speakers and moderators at HHS-sponsored conferences, do not necessarily reflect the official policies of the Department of Health and Human Services; nor does mention of trade names, commercial practices, or organizations imply endorsement by the U.S. Government. Additionally the study was funded

1  
2  
3 through grants from the Harry Crossley Foundation and the South African Medical  
4 Research Council (MRC). While the work was supported by the MRC, the views and  
5 opinions expressed are not those of the MRC but of the authors of the material  
6 produced.  
7  
8  
9

### 10 11 **Contributorship Statement**

12  
13  
14 Ms Jani Nöthling: data analysis and interpretation, writing of manuscript

15 Ms Cherie Martin: interpretation of analysis, writing of manuscript

16  
17 Dr Barbara Laughton: concept design, project leader of neurodevelopmental study,  
18 oversight of child behaviour data, revision of manuscript, read and approved  
19 manuscript  
20

21 Prof Mark Cotton: revision of manuscript, co-PI of study for the children with HIV  
22 Early Antiretroviral (CHER) trial for the HIV-infected infants

23 Prof Soraya Seedat: concept design, oversight of data analysis, revision of manuscript,  
24 read and approved manuscript  
25

26 Ms Marina Basson: data collection

27 Ms Lungiswa Rosy Khethelo: data collection

28 Dr Justin Harvey: data analysi  
29  
30  
31  
32  
33  
34  
35

### 36 **Competing Interests**

37  
38  
39 None  
40  
41  
42

### 43 **Data Sharing Statement**

44  
45  
46 No additional data  
47  
48  
49  
50  
51  
52  
53  
54  
55  
56  
57  
58  
59  
60

## REFERENCES

1. Herman AA, Stein DJ, Seedat S, et al. The South African stress and health (SASH) study: 12-month and lifetime prevalence of common mental disorders. *S Afr Med J* 2009; **99**: 339-44.
2. Atwoli L, Stein DJ, Williams DR. Trauma and posttraumatic stress disorder in South Africa: analysis from the South African Stress and Health Study. *BMC Psychiatry*; **13**: 182.
3. Tomlinson M, Cooper P, Murray L. The mother-infant relationship and infant attachment in a South African peri-urban settlement. *Child Dev* 2005; **76**: 1044-54.
4. Joint United Nations Programme on HIV/AIDS. (UNAIDS). Report on the global AIDS epidemic, 2010. [http://www.unaids.org/globalreport/global\\_report.htm](http://www.unaids.org/globalreport/global_report.htm) (accessed 1 Jul 2013)
5. Bing EG, Burnam A, Longshore D, et al. Psychiatric disorders and drug use among human immunodeficiency virus-infected adults in the United States. *Arch Gen Psychiatry* 2001; **58**: 721-8.
6. Ceisla JA, Roberts JE. Meta-analysis of the relationship between HIV infection and risk for depressive disorders. *Am J Psychiatry* 2001; **158**: 725-30.
7. Olley BO, Seedat S, Stein DJ. Persistence of psychiatric disorders in a cohort of HIV/AIDS patients in South Africa: a 6-month follow-up study. *J Psychosom Res* 2006; **61**: 479-84.
8. Myer L, Smit J, Le Roux L, et al. Common mental disorders among HIV-infected individuals in South Africa: prevalence, predictors, and validation of brief psychiatric ratings scales. *AIDS Patient Care STDs* 2008; **22**: 147-58.
9. Murray L, Cooper PJ. The impact of postpartum depression on child development. *Int Rev Psychiatry* 1996; **8**: 55-63.
10. Carter AS, Garrity-Rokous FE, Chazan-Cohen R et al. Maternal depression and comorbidity: predicting early parenting, attachment security, and toddler social-emotional problems and competencies. *J Am Acad Child Adolesc Psychiatry* 2001; **40**: 18-26.

- 1  
2  
3 11. Luoma I, Tamminen T, Kaukonen P, et al. Longitudinal study of maternal  
4 depressive symptoms and child well-being. *J Am Acad Child Adolesc*  
5 *Psychiatry* 2001; **40**: 1367-74.
- 6  
7  
8 12. Tomlinson M, Cooper P, Murray L. The mother-infant relationship and infant  
9 attachment in a South African peri-urban settlement. *Child Dev* 2005; **76**:  
10 1044-54.
- 11  
12  
13 13. Gao W, Paterson J, Abbott M, et al. Maternal mental health and child  
14 behaviour problems at 2 years: findings from the pacific islands families  
15 study. *Aust N Z J Psychiatry* 2007; **41**: 885-95.
- 16  
17  
18 14. Chronis AM, Pelham WE, Baumann BL, et al. Maternal depression and early  
19 positive parenting predict future conduct problems in young children with  
20 Attention-Deficit/Hyperactivity Disorder. *Dev Psychol* 2007; **43**: 70-82.
- 21  
22  
23 15. Chemtob CM, Nomura Y, Rajendran K et al. Impact of maternal posttraumatic  
24 stress disorder and depression following exposure to the September 11 attacks  
25 on preschool children's behavior. *Child Dev* 2010; **81**: 1129-41.
- 26  
27  
28 16. Qi CH, Kaiser AP. Behavior problems of preschool children from low-income  
29 families: review of the literature. *Top Early Child Spec*; **23**:188-216.
- 30  
31  
32 17. Kagan J, Snidman N. Early childhood predictors of adult anxiety disorders.  
33 *Biol Psychiatry* 1999; **46**: 1536-1541.
- 34  
35  
36 18. Williams B, Sanson A, Toumbourou J et al. Patterns and predictors of  
37 teenagers' use of licit and illicit substances in the Australian Temperament  
38 Project cohort. Melbourne: University of Melbourne, 2000.
- 39  
40  
41 19. Kaminer D, Grimsrud A, Myer L, et al. Risk for post-traumatic stress disorder  
42 associated with different forms of interpersonal violence in South Africa. *Soc*  
43 *Sci Med* 2008; **67**: 1589-95.
- 44  
45  
46 20. Olley BO, Zeier MD, Seedat S, et al. Post-traumatic stress disorder among  
47 recently diagnosed patients with HIV/AIDS in South Africa. *AIDS Care* 2005;  
48 **17**: 550-557.
- 49  
50  
51 21. Dailey DE, Humphreys JC, Rankin SH, et al. An exploration of lifetime  
52 trauma exposure in pregnant low-income African American women. *Matern*  
53 *Child Health J* 2011; **15**: 410-8.
- 54  
55  
56 22. Talge NM, Neal C, Glover V, et al. Antenatal maternal stress and long-term  
57 effects on child neurodevelopment: how and why? *J Child Psychol Psychiatry*  
58 2007; **48**: 245-61.
- 59  
60

- 1  
2  
3 23. Murphy DA, Marelich WD, Armistead L, et al. Anxiety/stress among mothers  
4 living with HIV: effects on parenting skills and child outcomes. *AIDS Care*  
5 2010; **22**: 1449-58.  
6  
7  
8 24. Bayer JK, Hiscock H, Ukoumunne OC, et al. Early childhood aetiology of  
9 mental health problems: a longitudinal population-based study. *J Child*  
10 *Psychol Psychiatry* 2008; **49**: 1166-74.  
11  
12 25. Siantz MLL, Coronado N, Dpyvdaitis T. Maternal predictors of behavioural  
13 problems among Mexican migrant farmworker children. *J Fam Nurs* 2010; **16**:  
14 322-43.  
15  
16 26. Barry TD, Dunlap ST, Cotton SJ et al. The influence of maternal stress and  
17 distress on disruptive behaviour problems in boys. *J Am Acad Child Adolesc*  
18 *Psychiatry* 2005; **44**: 265-73.  
19  
20 27. Rodriquez CM. Association between independent reports of maternal  
21 parenting stress and children's internalizing symptomatology. *J Child and Fam*  
22 *Stud* 2011; **20**: 631-9.  
23  
24 28. Chatterji P, Markowitz S. The impact of maternal alcohol and illicit drug use  
25 on children's behaviour problems: evidence from the children of the national  
26 longitudinal survey of youth. *J Health Econ* 2001; **20**: 703-31.  
27  
28 29. Mun EY, Fitzgerald HE, Eye AV, et al. Treatment characteristics as predictors  
29 of externalising and internalising child behaviour problems in the context of  
30 high and low parental psychopathology. *Inf Ment Health J* 2001; **22**: 393-415.  
31  
32 30. Eiden RD, Edwards AP, Leonard KE. A conceptual model for the  
33 development of externalising behaviour problems among kindergarten  
34 children of alcoholic families: role of parenting and children's self-regulation.  
35 *Dev Psychol* 2007; **43**: 1187-201.  
36  
37 31. Jones AS. Maternal alcohol abuse/dependence, children's behaviour problems,  
38 and home environment: estimates from the national longitudinal survey of  
39 youth using propensity score matching. *J Stud Alcohol Drugs* 2007, 266-275.  
40  
41 32. Barry CD. (2005). South Africa: alcohol today. *Addiction* 2005; **100**: 426-9.  
42  
43 33. May PA, Brooke L, Gossage JP, et al. Epidemiology of fetal alcohol syndrome  
44 in a South African community in the Western Cape Province. *Am J Public*  
45 *Health* 2000; **90**: 1905-12.  
46  
47  
48  
49  
50  
51  
52  
53  
54  
55  
56  
57  
58  
59  
60

- 1  
2  
3 34. May PA, Gossage JP, Marais A, et al. Maternal risk factors for fetal alcohol  
4 syndrome and partial fetal alcohol syndrome in South Africa: a third study.  
5 Alcohol Clin Exp Res 2008; **32**: 738-53.  
6  
7  
8 35. Parry CDH, Bhana A, Myers B, et al. Alcohol use in South Africa: findings  
9 from the South African community epidemiology network on drug use  
10 (SACENDU) project. J Stud Alcohol Drugs 2002; **63**: 430-435.  
11  
12 36. Viljoen DL, Gossage JP, Brooke L, et al. Fetal alcohol syndrome  
13 epidemiology in a South African community: a second study of a very high  
14 prevalence area. J Stud Alcohol Drugs 2005; **66**: 593-604.  
15  
16 37. Molina BSG, Donovan JE, Belenduik KA. Familial loading for alcoholism  
17 and offspring behaviour: mediating and moderating influences. Alc Clin Exp  
18 Res 2010; **34**: 1972 – 83.  
19  
20 38. Cotton MF, Violari A, Gibb D et al. Early ART followed by interruption is  
21 safe and is associated with better outcomes than deferred ART in HIV+  
22 infants: final results from the 6-year randomized CHER trial, South Africa.  
23 19<sup>th</sup> Conference in Retrovirology and Opportunistic Infection 2012. USA:  
24 Seattle.  
25  
26 39. World Health Organization (WHO). Laboratory guidelines for enumerating  
27 CD4 T Lymphocytes in the context of HIV/AIDS. Regional Office for South-  
28 East Asia 2007.  
29 [http://www.who.int/hiv/amds/LaboratoryGuideEnumeratingCD4TLymphocyt](http://www.who.int/hiv/amds/LaboratoryGuideEnumeratingCD4TLymphocytes.pdf)  
30 [es.pdf](http://www.who.int/hiv/amds/LaboratoryGuideEnumeratingCD4TLymphocytes.pdf) (accessed 1 Jul 2013)  
31  
32 40. Mollica R, McDonald L, Massagli M., et al. Measuring Trauma, Measuring  
33 Torture, Instructions and Guidance on the Utilization of the Harvard Program  
34 in Refugee Trauma's Versions of the Hopkins Symptom Checklist-25 (HSCL-  
35 25) and the Harvard Trauma Questionnaire (HTQ). Cambridge MA: Harvard  
36 Program in Refugee Trauma 2004.  
37  
38 41. Rethon C, Stansfeld, SA, Mathews C, et al. Reliability of self report  
39 questionnaires for epidemiological investigations of adolescent mental health  
40 in Cape Town, South Africa. J Child Adolesc Ment Health 2011; **23**: 119-128.  
41  
42 42. Saunders JB, Aasland OG, Babor TF, et al. Development of the Alcohol Use  
43 Disorders Identification Test (AUDIT): WHO Collaborative Project on Early  
44 Detection of persons with Harmful Alcohol Consumption - II. Addiction 1993;  
45 **88**: 791-804.  
46  
47  
48  
49  
50  
51  
52  
53  
54  
55  
56  
57  
58  
59  
60



- 1
- 2
- 3 43. Bohn MJ, Babor TF, Kranzler HR. The alcohol use identification test
- 4 (AUDIT): validation of a screening instrument for use in medical settings. *J*
- 5 *Stud Alcohol* 1995; **56**: 423-32.
- 6
- 7
- 8 44. Cherpitel CJ, Clark WB. Ethnic differences in performance of screening
- 9 instruments for identifying harmful drinking and alcohol dependence in the
- 10 emergency room. *Alcohol Clin Exp Res* 1995; **19**: 628-34.
- 11
- 12 45. Cherpitel CJ, Borges G. Performance of screening instruments for alcohol
- 13 problems in the ER: a comparison of Mexican-Americans and Mexicans in
- 14 Mexico. *Am J Drug Alcohol Abuse* 2000; **26**: 683-702.
- 15
- 16 46. Medina-Mora E, Carreno S, de la Fuente JR. Experience with the alcohol use
- 17 disorders identification test (AUDIT) in Mexico. *Recent Dev Alc* 1998; **14**:
- 18 383-96.
- 19
- 20 47. Seale P, Seale JD, Alvarado M, et al. Prevalence of problem drinking in a
- 21 Venezuelan Native American population. *Alcohol Alcohol* 2002; **37**: 198-204.
- 22
- 23 48. Leung SF, Arthur D. The alcohol use disorders identification test (AUDIT):
- 24 validation of an instrument for enhancing nursing practice in Hong Kong. *Int J*
- 25 *Nurs Stud* 2000; **37**: 57-64.
- 26
- 27 49. Chinyadza E, Moyo IM, Katsumbe TM et al. Alcohol problems among
- 28 patients attending five primary health care clinics in Harare city. *Cent Afr J*
- 29 *Med* 1993; **39**: 26-32.
- 30
- 31 50. Simbayi LC, Kalichman SC, Jooste S, et al. Alcohol use and sexual risks for
- 32 HIV infection among men and women receiving sexually transmitted infection
- 33 clinic services in Cape Town, South Africa. *J Stud Alcohol Drugs* 2004; **65**:
- 34 434-42.
- 35
- 36 51. Shaffer DN, Njeri R, Justice AC, et al. Alcohol abuse among patients with and
- 37 without HIV infection attending public clinics in western Kenya. *East Afr*
- 38 *Med J* 2004; **81**: 594-8.
- 39
- 40 52. Boyd JH, Weissman MM, Thompson WD, et al. Screening for depression in a
- 41 community sample. Understanding the discrepancies between depression and
- 42 diagnostic scales. *Arch Gen Psychiatry* 1982; **39**: 1195-2000.
- 43
- 44 53. Meyers JK, Weissman MM. Use of a self-report symptom scale to detect
- 45 depression in a community sample. *Am J Psychiatry* 1980; **137**: 1081-4.
- 46
- 47 54. Roberts RE, Vernon SW. The Center for Epidemiological Studies Depression
- 48 Scale: its use in a community sample. *Am J Psychiatry* 1983, **140**, 41-6.
- 49
- 50
- 51
- 52
- 53
- 54
- 55
- 56
- 57
- 58
- 59
- 60



- 1  
2  
3 55. Ghubash R, Daradkeh TK, Al Naseri KS et al. The performance of the Center  
4 for Epidemiology Study Depression Scale (CES-D) in an Arab female  
5 community. *Int J Soc Psychiatry* 2000; **46**: 241-9.  
6  
7
- 8 56. Iwata N, Buka S. Race/ethnicity and depressive symptoms: a cross-  
9 cultural/ethnic comparison among university students in East Asia, North and  
10 South America. *Soc Sci Med* 2002; **55**: 2243-52.  
11
- 12 57. Munet-Vilaro F, Folkman S, Gregorich S. Depressive symptomatology in  
13 three Latino groups. *Western J Nurs Res* 1999; **21**: 209-24.  
14
- 15 58. Guarnaccia PJ, Angel R, Worobey JL. The factor structure of the CES-D in  
16 the Hispanic Health and Nutrition Examination Survey: the influences of  
17 ethnicity, gender and language. *Soc Sci Med* 1989; **29**: 85-94.  
18
- 19 59. Roberts RE, Rhoades HM, Vernon SW. Using the CES-D scale to screen for  
20 depression and anxiety: effects of language and ethnic status. *Psychiatr*  
21 *Res* 1990; **31**: 69-83.  
22
- 23 60. Kalichman SC, Rompa D, Cage M. Distinguishing between overlapping  
24 somatic symptoms of depression and HIV disease in people living with HIV-  
25 AIDS. *J Nerv Ment Dis* 2000; **188**: 662-70.  
26
- 27 61. Simoni JM, Ng MT. Trauma, coping, and depression among women with  
28 HIV/AIDS in New York City. *AIDS Care* 2000; **12**: 567-80.  
29
- 30 62. Schuman P, Ohmit SE, Moore J, et al. Human Immunodeficiency Virus  
31 Epidemiology Research Study. Perceived need for and use of mental health  
32 services by women living with or at risk of human immunodeficiency virus  
33 infection. *J Am Med Womens Assoc* 2001; **56**: 4-8.  
34
- 35 63. Eller LS, Mahat G. Psychological factors in Nepali former commercial sex  
36 workers with HIV. *J Nurs Sch* 2003; **35**: 53-60.  
37
- 38 64. Sheehan DV. *The Anxiety Disease*. Scribner: New York 1983.  
39
- 40 65. Troeman CE, Spies G, Cherner M, et al. Impact of childhood trauma on  
41 functionality and quality of life in HIV-infected women. *Health and Quality of*  
42 *Life Outcomes* 2011; **9**:84.  
43
- 44 66. Achenbach TM, Rescorla LA. *Manual for the ASEBA school-age forms and*  
45 *profiles*. Burlington: University of Vermont 2001.  
46
- 47 67. Calkins SD, Dedmon SE. Physiological and behavioral regulation in two-year-  
48 old children with aggressive/destructive behavior problems. *J Abnorm Child*  
49 *Psychol* 2000; **28**: 103-18.  
50  
51  
52  
53  
54  
55  
56  
57  
58  
59  
60

- 1  
2  
3 68. Gross D, Fogg L, Young M, et al. The equivalence of the child behavior  
4 checklist/ 1½-5 across race/ethnicity, income level, and language. *Psychol*  
5 *Assessment* 2006; **18**: 313-323.  
6  
7  
8 69. Mesman J, Bongers IL, Koot HM. Preschool development pathways to  
9 preadolescent internalizing and externalizing problems. *J Child Psychol*  
10 *Psychiatry* 2001; **42**: 679-89.  
11  
12  
13 70. Cooper PJ, Tomlinson M, Swartz L, et al. Post-partum depression and the  
14 mother-infant relationship in a South African peri-urban settlement. *Br J*  
15 *Psychiatry* 1999; **175**: 554-8.  
16  
17  
18 71. Instone SL. Perceptions of children with HIV infection when not told for so  
19 long: implications for diagnosis disclosure. *J Pediatr Health Care* 2000; **14**:  
20 235-43.  
21  
22  
23 72. Richter LM. Poverty, underdevelopment and infant mental health. *J Paediatr*  
24 *Child Health* 2003; **39**: 243-8.  
25  
26  
27 73. Hudson JL, Rapee RM. Parent-child interaction and anxiety disorders: an  
28 observational study. *Behav Res Ther* 2001; **39**: 1411-27.  
29  
30  
31 74. Bögels SM, Brechman-Toussaint ML. Family issues in child anxiety:  
32 attachment, family functioning, parental rearing and beliefs. *Clin Psychol Rev*  
33 2006; **26**: 834-56.  
34  
35  
36 75. O'Connor TG, Heron J, Golding J. et al. Report from the Avon longitudinal  
37 study of parents and children. *Br J Psychiatry* 2002; **180**: 502-8.  
38  
39  
40 76. Katwan E, Adnams C, London L. Childhood behavioural and developmental  
41 disorders associated with maternal alcohol consumption in Cape Town, South  
42 Africa. *S Afr Med J* 2011; **101**: 724-7.  
43  
44  
45  
46  
47  
48  
49  
50  
51  
52  
53  
54  
55  
56  
57  
58  
59  
60

1  
2  
3 **MATERNAL POSTTRAUMATIC STRESS DISORDER, DEPRESSION AND**  
4 **ALCOHOL DEPENDENCE AND CHILD BEHAVIOUR OUTCOMES IN HIV**  
5 **INFECTED MOTHER-CHILD DYADS: A LONGITUDINAL STUDY**  
6  
7  
8  
9

10  
11  
12 Corresponding Author: Jani Nöthling, Stellenbosch University, Tygerberg Campus,  
13 Department of Psychiatry, P.O. Box 19063, Tygerberg, 7505  
14  
15

16  
17  
18  
19 Jani Nöthling,<sup>1</sup> Cherie L Martin,<sup>2</sup> Barbara Laughton,<sup>3</sup> Mark F Cotton,<sup>3</sup>  
20

21 Soraya Seedat<sup>1</sup>  
22  
23

24  
25  
26 <sup>1</sup> Department of Psychiatry, Stellenbosch University, Cape Town, South Africa  
27

28 <sup>2</sup> School of International Development and Global Studies, University of Ottawa,  
29 Ontario, Canada  
30  
31

32 <sup>3</sup> Department of Paediatrics and Child Health, The Children's Infectious Diseases  
33 Clinical Research Unit (KID-CRU), Stellenbosch University, Cape Town, South  
34 Africa  
35  
36  
37  
38  
39  
40  
41  
42  
43  
44  
45  
46  
47  
48  
49  
50  
51  
52  
53  
54  
55  
56  
57  
58  
59  
60

## ABSTRACT

**Objectives:** HIV and psychiatric disorders are prevalent and often concurrent. Child-bearing women are at an increased risk for both HIV and psychiatric disorders, specifically depression and posttraumatic stress disorder (PTSD). Poor mental health in the peripartum period has adverse effects on infant development and behaviour. Few studies have investigated the relationship between maternal PTSD and child behaviour outcomes in an HIV vertically infected sample. The aim of this study was to investigate if maternal postpartum trauma exposure and PTSD were risk factors for child behaviour problems. Additionally, maternal depression, alcohol abuse and functional disability were explored as co-factors.

**Setting:** The study was conducted in Cape Town, South Africa.

**Participants:** Seventy mother-child dyads infected with HIV were selected from a group of participants recruited from Community Health Centers.

**Design:** The study followed a longitudinal design. Five measures were used to assess maternal trauma exposure, PTSD, depression, alcohol abuse and functional disability at 12 months postpartum: Life Events Checklist (LEC), Harvard Trauma Scale (HTS), Alcohol Use Disorders Identification Test (AUDIT), Center for Epidemiological Studies Depression Scale (CESD) and the Sheehan Disability Scale (SDS). Child behaviour was assessed at 42 months with the Child Behaviour Checklist (CBCL).

**Results:** The rate of maternal disorder was high with 50% scoring above the cut-off for depression, 22.9% for PTSD, and 7% for alcohol abuse. Half of children scored within the clinical range for problematic behaviour. Children of mothers with depression were significantly more likely to display total behaviour problems than children of mothers without depression. Maternal PTSD had the greatest explanatory power for child behaviour problems although it did not significantly predict child outcomes.

**Conclusion:** This study highlights the importance of identifying and managing maternal PTSD and depression in mothers of children infected with HIV. The relationship between maternal PTSD and child behaviour warrants further investigation.

## ARTICLE SUMMARY

### Article focus

- This study investigated maternal mental health (PTSD, trauma exposure, depression and alcohol abuse) at one year postpartum as a predictor of child behaviour problems at three and a half years of age in HIV infected, mother-child dyads.
- Self-reports were used to determine the prevalence of maternal psychiatric disorders and child behaviour problems in the dyads.

### Key Messages

- Maternal depression is associated with child behaviour problems in the general population as well as in this HIV infected sample.
- Prevalence of maternal depression and PTSD is high among mothers infected with HIV and prevalence of child behaviour problems is high among their infected children.
- The influence of maternal PTSD on child behaviour warrants further investigation.

### Strengths and limitations of the study

- This study is, to our knowledge, the first to investigate PTSD as a predictor of child behaviour in vertically transmitted, HIV infected, mother-child-dyads.
- The study employed a longitudinal design with the child participants being relatively healthy as indicated by immunological status.
- The sample size of the study may have reduced statistical power, and poor maternal ~~mental~~ physical health, change in child's medical treatment and- change in caregiver may have biased the results. ~~health may have biased caregiver perceptions of child behaviour.~~

## INTRODUCTION

South Africa has a high HIV prevalence rate of 11%. [1] The prevalence of psychiatric disorders in the general South African population is also relatively high compared to other countries, with an estimated lifetime prevalence of 30.3% and 12-month prevalence rates of 30.3% and 16.5% respectively. [12] Depression, alcohol abuse and posttraumatic stress disorder (PTSD) are commonly diagnosed disorders with a 12-month prevalence rate of 4.9%, 4.5% and 0.7% respectively. [1,2] Among South Africans, Alcohol abuse has a lifetime prevalence rate of 11.4% followed by depression with 9.8% and PTSD with 2.3%. [1,2] Postpartum depression is also prevalent in South Africa. High prevalence rates of 28% and 34.7% have been reported among new mothers. [3]

In addition to high prevalence of psychiatric disorders, South Africa is overly burdened by HIV infection with a prevalence rate of 11%. [4] There is an increased risk of eCommon psychiatric disorders are often associated addoeiated with HIV infection [5-83-6] with depression nearly twice as common in infected individuals. [64] One study documented a 19% prevalence of common psychiatric disorders among HIV infected South Africans, with 14% meeting criteria for depression, 5% for posttraumatic stress disorder (PTSD) PTSD and 7% for alcohol dependence or abuse. [86] Individuals newly diagnosed with HIV are at an even higher risk for a common psychiatric disorder. [75] In addition, women are disproportionately and dually burdened by HIV and mood and anxiety disorders. Female gender is considered a risk factor for mood and anxiety disorders and for increased severity of these disorders. [12] and wWomen, especially child-bearing women, are disproportionately affected by HIV. [34]

Poor maternal mental health is associated with adverse long-term effects in child development and behaviour. [7-139-15] Prevalence rates of 16% - 30% and 7% - 31% for externalising behaviour problems and internalising behaviour problems respectively have been identified among preschool children in low income families. [16] Internalising and externalising behaviour problems can persist into adolescence. For example, infant negative emotional reactivity and shyness has been associated with inhibition and withdrawal in early childhood and with anxiety symptoms in middle childhood and adolescence. [17] Negative reactivity, low persistence, aggression and school difficulties in childhood have also been associated with substance abuse in adolescence. [18]

1  
2  
3 ~~-Maternal Depression~~, including postpartum depression, is linked to various  
4 forms of child and infant internalising and externalising behaviour problems, such as:  
5 insecure attachment and less optimal mother-child interaction; [108,1210,14] higher  
6 levels of tension and lower levels of emotional development; [97] low social  
7 competence and adaptive functioning [119]; poorer cognitive development; [97]  
8 lower competencies and general behaviour problems in boys; [108] and attention-  
9 deficit hyperactivity disorder. [1412] ~~These problems can persist into adolescence.~~  
10 ~~For example, infant negative emotional reactivity and shyness has been associated~~  
11 ~~with inhibition and withdrawal in early childhood and with anxiety symptoms in~~  
12 ~~middle childhood and adolescence. [15] Negative reactivity, low persistence,~~  
13 ~~aggression and school difficulties in childhood have also been associated with~~  
14 ~~substance abuse in adolescence. [16]~~

15  
16  
17  
18  
19  
20  
21  
22  
23 Furthermore, children of mothers with comorbid PTSD and depression are  
24 significantly more likely to display internalising and externalising behaviour  
25 problems compared to children of mothers with depression only. [1513] These  
26 children are more likely to display somatic symptoms and are more likely to be  
27 emotionally reactive, anxious/depressed and aggressive. [1513] South Africa has a  
28 high rate of exposure to violence and traumatic events which increases risk for PTSD.  
29 [197] Prevalence of PTSD and trauma exposure is high among individuals infected  
30 with HIV, with female gender being a significant risk factor in this group. [5-83-  
31 6,2018,2119] Women infected with HIV are therefore at high risk of PTSD and their  
32 children are consequently at risk of behavioural and developmental problems.

33  
34  
35  
36  
37  
38  
39  
40 Maternal stress and anxiety is also linked to child behaviour problems.  
41 Various studies have investigated the negative effect of antenatal maternal stress on  
42 child development. [2220] Fewer studies have focussed on postpartum maternal stress  
43 and anxiety and child behaviour outcomes. However, maternal stress and anxiety is  
44 negatively associated with parenting skills, and infant and child behaviour problems.  
45 [21-2323-25] Maternal anxiety is a significant predictor of child attention and  
46 aggression problems [2624] and maternal stress is significantly associated with child  
47 anxious and depressive symptoms. [2725]

48  
49  
50  
51  
52  
53  
54  
55  
56  
57  
58  
59  
60 In addition to anxiety, PTSD and depression, maternal postpartum alcohol  
abuse/dependence has been associated with child and infant behaviour problems and  
developmental risk. [28-3126-29] Alcohol abuse is one of the major contributors to  
disease burden in South Africa and antenatal alcohol abuse is associated with high



1  
2  
3 rates of fetal alcohol spectrum disorders. [32-3630-34] Child behaviour problems  
4 associated with parental postpartum alcohol abuse/dependence include: poor  
5 inhibitory control, attention shifting, distractibility, defiance, aggression, delinquency,  
6 emotional reactivity and withdrawal. [2927,3735]  
7  
8

9  
10 To date, few studies have investigated the relationship between maternal  
11 postpartum trauma exposure, PTSD and child behaviour outcomes. None, to our  
12 knowledge, have examined this relationship in HIV-infected individuals, despite  
13 evidence of high prevalence of PTSD in this group and its public health implications.  
14 This is of significant public health concern particularly in the South African context.  
15 The primary aim of this study was to investigate the impact of maternal trauma  
16 exposure and PTSD at a specific time point (12 months postpartum) and the ~~ir~~  
17 ~~long-~~  
18 ~~term effect association thereof on with~~ child behaviour (at three and a half years of  
19 age) in mother-child dyads, infected with HIV, while controlling for the effects of  
20 depression. A secondary aim of the study was to investigate the relationship between  
21 maternal alcohol dependence/abuse, functional disability and child behaviour  
22 outcomes.  
23  
24  
25  
26  
27  
28  
29

## 30 31 **METHODS**

### 32 **Participants**

33  
34 Seventy mother-child dyads infected with HIV participated in ~~this~~ study. ~~Data was~~  
35 ~~collected from between 2006 and till 2010. from 2005 onwards.~~ In eight cases, the  
36 maternal caregiver was not the child's biological mother. 'Maternal' ~~or~~ 'mother'  
37 within the context of this study therefore refers to either the biological mothers ~~or~~  
38 primary caregiver of the child. ~~The child had to be in the care of the caregiver for at~~  
39 ~~least six months prior to the assessments to qualify as a suitable participant.~~ The  
40 mother-child dyads were selected, based on the completeness of their data, as a sub-  
41 group from the Children with HIV Early Antiretroviral Therapy (CHER) trial. HIV-  
42 infected infants entered the ~~study-CHER trial~~ at a mean of seven weeks of age and  
43 were randomised to early antiretroviral therapy for either 40 weeks or 96 weeks  
44 followed by planned treatment interruption or deferred therapy until meeting  
45 treatment guideline thresholds at that time; a CD4 below 20% (25% in first year of  
46 life) or progression of HIV disease. ~~The CHERhis~~ study commenced in 2005 and  
47 ended in 2011. [386] The study was conducted in two South African sites, the  
48 Perinatal HIV Research Unit in Soweto and the Children's Infectious Diseases  
49  
50  
51  
52  
53  
54  
55  
56  
57  
58  
59  
60

1  
2  
3 Clinical Research Unit (KID-CRU), in Tygerberg Children's Hospital, Cape Town.  
4 Participants were identified and recruited from local community health centres  
5 through HIV vertical transmission prevention programs. A

6  
7  
8 neurodevelopmental sub-study was conducted in KID-CRU, and the  
9 data collected at this site was used in the current study.  
10

### 11 12 13 **Study Design**

14 The neurodevelopmental sub-study reported herein was conducted over five years,  
15 and included all infants with birth weight >2000g and normal neurological  
16 examination before 12 weeks of age and excluded infants with CNS insults other than  
17 due to HIV. Maternal assessments were completed at 10-12 months and infant  
18 assessments at 42 months of age.

19  
20  
21 ~~The study under investigation was approved by the~~  
22 ~~Health Research Ethics Committee of Stellenbosch University in Cape Town, South~~  
23 ~~Africa (N05/07/113). The ethics committee granted a waiver of parental consent for~~  
24 ~~participants who were less than 18 years of age. Committee for Health Research at~~  
25 ~~Stellenbosch University, Cape Town, South Africa, approved the study.~~  
26  
27  
28  
29  
30

### 31 32 **Procedures**

33 Informed consent was obtained from all mothers of infants (aged 16 years and older)  
34 infected with HIV, in their preferred language (English, Afrikaans or isiXhosa).

35 Maternal participants completed a series of questionnaires including a demographic  
36 questionnaire, the Life Events Checklist (LEC), the Harvard Trauma Scale (HTS), the  
37 Alcohol Use Disorder Identification Test (AUDIT), the Center for Epidemiologic  
38 Studies Depression Scale (CESD), and the Sheehan Disability Scale (SDS). The same  
39 battery of questionnaires was completed at five different time points over the course  
40 of five years. The assessments completed at 12 months postpartum were used in the  
41 current analysis for this study. This was deemed a salient period for examining PTSD  
42 in new mothers and -was intended to decrease the risk of confounding by postpartum  
43 depression, as the risk for postpartum depression is highest within the first year after  
44 giving births. These self-report measures were verbally administered in Afrikaans  
45 and English by a trained research psychologist. A trained research assistant was used  
46 for Xhosa-speaking mothers.  
47  
48  
49  
50  
51  
52  
53  
54  
55

56 Child behaviour was assessed at 42 months postpartum using the Child  
57 Behaviour Checklist (CBCL). This time point was selected based on completeness of  
58  
59  
60

~~data and in an effort to measure the long-term effects of maternal mental health. The which the mothers or caregivers of the child completed the CBCL, who were living with the children for the previous six months and took responsibility for caring for the child, completed on their own.~~ The CBCL was administered by a research assistant if

the mothers were illiterate or had difficulty completing the assessment.

Immunodeficiency in children was measured using CD4 percentages and absolute scores. Immunodeficiency was determined in according to the World Health

Organisation's guidelines on the classification of HIV associated immunodeficiency

in children. [397] The CD4 counts and percentages of children were determined on a regular basis, but viral loads were only determined if there were concerns about treatment failure. Maternal CD4 counts and viral loads were not assessed as mothers were not receiving treatment at the same facility as the children.

## Measures

### Demographic Questionnaire

Biographical information regarding maternal age, ethnicity, language, marital status, education, annual household income, employment status and gender of the child was determined through a demographic questionnaire. The relationship of the caregiver to the child was also obtained.

### Life Events Checklist

Traumatic life events were measured using the Life Events Checklist (LEC) The Life Events Checklist is a 16-item self-report questionnaire assessing the incidence of 16 different categories of traumatic events including physical assault, life threatening illness, natural disasters, sexual assault, and sudden unexpected death of a loved one. Participants had three optional responses to each item; direct 'happened to me', indirect 'witnessed it', and removed 'heard about it'. A score was then tallied for the total number of direct Life Events. Respondents who reported directly experienced trauma were asked to complete the Harvard Trauma Scale.

### Harvard Trauma Scale

The Harvard Trauma Scale (HTS) is a 30-item, self-report questionnaire designed to screen for the presence of PTSD in cross-cultural populations. [4038] Examples of items include 'feeling as though the event is happening again' and 'nightmares about

1  
2  
3 the event that keep coming back'. Symptoms are reported on a four point Likert scale  
4 ranging from "not at all" to "extremely", with a total score range of 30 to 120. The  
5 cut-off score indicative of PTSD is 75 or higher. The HTS- ~~has shown strong test-~~  
6 ~~retest reliability among-in a South African, adolescent sampleis regarded a valid and~~  
7 ~~reliable measure to screen for a diagnosis of PTSD where cross-cultural sensitivity is~~  
8 ~~necessary.~~ [4139]  
9  
10  
11  
12

#### 13 14 Alcohol Use Disorders Identification Test

15  
16 Alcohol dependence and abuse were measured using the Alcohol Use Disorders  
17 Identification Test (AUDIT). The 10-item questionnaire assesses alcohol dependence  
18 and abuse and is scored on a five point Likert scale from "never" to "daily or almost  
19 daily". The cut-off score is set at eight for alcohol abuse and 13 or more for alcohol  
20 dependence. The AUDIT is a reliable measure developed by the World Health  
21 Organisation and has been implemented and tested internationally. [4240] It has been  
22 applied in a variety of settings and cultures [43-4541-43] including Mexico, [4644]  
23 Venezuela, [4745] Hong Kong, [4846] Zimbabwe [4947] and in South Africa with  
24 HIV-infected patients. [50,5148,49] In each of these studies the AUDIT outperformed  
25 other self-report measures in the identification of alcohol abuse and dependence.  
26  
27  
28  
29  
30  
31  
32  
33

#### 34 35 Center for Epidemiological Studies Depression Scale

36  
37 The Center for Epidemiological Studies Depression Scale (CESD) is a self-report  
38 measure to screen for depression. The CESD is a 20-item scale that assesses current  
39 levels of depression as per DSM-IV criteria. Responses are measured on a four point  
40 Likert scale ranging from "rarely or none of the time" to "most or all of the time". A  
41 score of 16 or more is considered indicative of depression. The CESD has been  
42 validated for clinic and community settings to detect depressive symptoms [52-5450-  
43 52] and in many cross-cultural samples [55-5753-55] and across ethnic groups.  
44 [56,5758,59] The CESD has been used to measure depression in several clinic  
45 samples of individuals infected with HIV. [60-6358,59,60,61]  
46  
47  
48  
49  
50  
51  
52

#### 53 54 The Sheehan Disability Scale

55  
56 The Sheehan Disability Scale (SDS) is a self-report measure used to evaluate patients'  
57 functional impairment in relation to self-reported symptoms. [6462] Functional  
58 disability is assessed across three core areas, namely, work/school, social life, and at  
59  
60

1  
2  
3 home/family responsibilities. Functioning is reported on a visual analogue scale  
4 ranging from zero to ten. Higher scores indicate greater impairment and disability.

5  
6 The SDS is frequently used in clinical trials in psychiatry [and has shown good](#)  
7 [reliability in an HIV infected, South African sample.](#) ~~and is a valid, reliable measure~~  
8 ~~of functional disability, responsive to change over time.~~ [6563]  
9

### 10 11 12 The Child Behaviour Checklist

13 Child behaviour problems were assessed using the preschool version of the Child  
14 Behaviour Checklist (CBCL). [6664] The CBCL is a 100 item self-report  
15  
16  
17  
18 questionnaire, usually completed by a parent or caregiver. The items are scored on a  
19  
20 three point Likert scale ranging from “not true” to “very true or often true”.

21 Behavioural problems are measured in eight domains, namely, emotionally reactive,  
22  
23  
24  
25  
26  
27  
28  
29  
30  
31  
32  
33  
34  
35  
36  
37  
38  
39  
40  
41  
42  
43  
44  
45  
46  
47  
48  
49  
50  
51  
52  
53  
54  
55  
56  
57  
58  
59  
60  
Behavioural problems are measured in eight domains, namely, emotionally reactive,  
anxious/depressed, somatic complaints, withdrawn behaviour, sleep problems,  
common/non-specific problems, attention problems and aggressive behaviour. The  
first four domains are viewed as internalising behaviour problems, the last two  
domains are viewed as externalising behaviour problems and all of the domains  
combined are viewed as total behaviour problems. The CBCL is a widely used  
behavioural checklist with good reliability and validity in a variety of cultural and  
language settings. [67-6965,66,67]

### Data analysis

All analyses were performed using Statistical Analysis Software (SAS) and SPSS  
version 20. Descriptive statistics were computed for the demographic characteristics  
of the sample as well as the prevalence rates of maternal mental health problems and  
child behavioural problems. Differences in behaviour problems between children of  
mothers with and without PTSD, depression and alcohol abuse were analysed by  
means of t-tests. Linear regression analysis was ~~preformed~~performed to determine if  
maternal mental status was a significant predictor of child behaviour outcomes. Of  
particular interest was the influence of trauma exposure and PTSD on child behaviour  
outcomes. Depression was controlled for due to previous studies reporting a  
relationship between depression and child behaviour problems.

Three models were run with the following continuous outcome variables as  
measured by the CBCL: total child behavioural problems (internalising, externalising  
and sleep problems), child internalising behaviour problems and child externalising

behaviour problems. The same continuous predictor variables were used in all three regression models. The predictor variables were: exposure to traumatic life events (LE), PTSD symptomatology (HTS), alcohol abuse/dependence (AUDIT), depression (CESD) and functional disability (SDS).

## RESULTS

### Sample demographics

The sample included 70 mother-child dyads, each being HIV-infected. The mean age of the mothers/caregivers at 12 months postpartum was 28.8 (range: 16-64) years. The mother-child dyads were mainly black (88.6%) and Xhosa speaking (65.7%). The mothers were mostly single (64.3%) and unemployed (80.9%). The majority of mothers had some secondary schooling (58.6%) with an annual income below R10 000 (72.9%, US\$1038). ~~Thirty~~Thirty-six children (51%) were female. The majority of caregivers at 10 to 12 months (94.3%) and 42 months (91.4%) were the biological mothers of the children, however there were eight changes in caregiver from 12 months postpartum to 42 months postpartum. Reasons for change in caregiver included: mother passed away (n = 3), mother was unavailable on the day of assessment (n = 2), and the person attending lived with the child and was closely involved in caring for the child (n = 3).

~~At 42 months, the majority of the children did not have CD4 percentages (91.4%, range: 16.3%-53.6%) or absolute scores (100%, range: 468-3267) indicative of immunodeficiency.~~The prevalence of infant immunodeficiency was higher relatively high at 10 to 12 months postpartum with 47.1% (range: 15.4%-54.5%) and 40% (range: 574-3777) showing mild to severe immunodeficiency based on CD4 percentages and absolute ~~scores-counts~~ respectively. At 42 months, the majority of the children did not have CD4 percentages (91.4%, range: 16.3%-53.6%) or absolute scores-counts (100%, range: 468-3267) indicative of immunodeficiency. The demographic and biological information of participants are presented in Table 1.

Table 1  
*Demographic layout of the sample*

|                                                                     | N  | %    | M    |
|---------------------------------------------------------------------|----|------|------|
| Relationship of carer to child at 12 months postpartum <sup>1</sup> | 70 |      |      |
| Mother                                                              | 66 | 94.3 |      |
| Grandmother                                                         | 2  | 2.9  |      |
| Aunt                                                                | 1  | 1.4  |      |
| Guardian                                                            | 1  | 1.4  |      |
| Relationship of carer to child at 42 months postpartum <sup>2</sup> | 70 |      |      |
| Mother                                                              | 64 | 91.4 |      |
| Grandmother                                                         | 5  | 7.1  |      |
| Aunt                                                                | 1  | 1.4  |      |
| Age of mother/caregiver <sup>1</sup>                                | 70 |      | 28.8 |
| Gender of child <sup>1</sup>                                        | 70 |      |      |
| Male                                                                | 34 | 48.6 |      |
| Female                                                              | 36 | 51.4 |      |
| Language <sup>1</sup>                                               | 70 |      |      |
| Afrikaans                                                           | 9  | 12.9 |      |
| English                                                             | 15 | 21.4 |      |
| Xhosa                                                               | 46 | 65.7 |      |
| Ethnicity <sup>1</sup>                                              | 70 |      |      |
| Black                                                               | 62 | 88.6 |      |
| Coloured                                                            | 3  | 4.3  |      |
| White                                                               | 4  | 5.7  |      |
| Asian                                                               | 1  | 1.4  |      |
| Marital Status <sup>1</sup>                                         | 70 |      |      |
| Single                                                              | 45 | 64.3 |      |
| Married/living with a partner                                       | 23 | 32.9 |      |
| Divorced/separated                                                  | 2  | 2.9  |      |
| Annual Income <sup>1</sup>                                          | 70 |      |      |
| < R10 000                                                           | 51 | 72.9 |      |
| R 10 000 – R20 000                                                  | 11 | 15.7 |      |
| R 20 000 – R 40 000                                                 | 2  | 2.9  |      |
| R 40 000 – R 60 000                                                 | 0  | 0    |      |
| R 60 000 – R 100 000                                                | 1  | 1.4  |      |
| > R 100 000                                                         | 0  | 0    |      |
| Level of Education <sup>1</sup>                                     | 70 |      |      |
| No schooling                                                        | 0  | 0    |      |
| Some primary schooling                                              | 7  | 10   |      |
| Completed primary school                                            | 3  | 4.3  |      |



|                                                                                           | N  | %    | M      |
|-------------------------------------------------------------------------------------------|----|------|--------|
| Some secondary schooling                                                                  | 41 | 58.6 |        |
| Grade 12 completed                                                                        | 18 | 25.7 |        |
| Higher education completed                                                                | 1  | 1.4  |        |
| Employment Status <sup>1</sup>                                                            | 68 |      |        |
| Employed                                                                                  | 13 | 19.1 |        |
| Unemployed                                                                                | 55 | 80.9 |        |
| Immunodeficiency (CD4 percentage) of child <sup>1</sup>                                   | 70 |      | 36.1   |
| Not significant (>30%)                                                                    | 37 | 52.9 |        |
| Mild (25-30%)                                                                             | 15 | 21.4 |        |
| Advanced (20-24%)                                                                         | 12 | 17.1 |        |
| Severe (<20%)                                                                             | 6  | 8.6  |        |
| Immunodeficiency (CD4 absolute score) of child <sup>1</sup>                               | 70 |      | 1862.6 |
| Not significant                                                                           | 42 | 60   |        |
| Significant (<750)                                                                        | 28 | 40   |        |
| Immunodeficiency (CD4 percentage) of child <sup>2</sup>                                   |    |      | 34.3   |
| Not significant (>25%)                                                                    | 64 | 91.4 |        |
| Mild (20-25%)                                                                             | 4  | 5.7  |        |
| Advanced (15-19%)                                                                         | 2  | 2.9  |        |
| Severe (<15%)                                                                             | 0  | 0    |        |
| Immunodeficiency (CD4 absolute <del>score</del> <u>scorecount</u> ) of child <sup>2</sup> |    |      | 1374.2 |
| Not significant                                                                           | 70 | 100  |        |
| Significant (<350)                                                                        | 0  | 0    |        |

<sup>1</sup>Data recorded at 12 months postpartum

<sup>2</sup>Data recorded at 42 months postpartum

### Prevalence of maternal psychiatric disorders and child behaviour problems

The prevalence rate for all [measured](#) maternal psychiatric disorders ([based on self-report](#) ~~ad data~~ ~~datassessments~~) was 27.6%. Depression was the most prevalent disorder at 50% (n = 35), followed by PTSD with 22.9% (n = 16), alcohol abuse with 7.1% (n = 5) and alcohol dependence with 2.9% (n = 2). A large proportion of children scored within the clinical range for problematic behaviour with a prevalence rate of 44.3% (n = 31) for total behaviour problems. Internalising behaviour problems were most prevalent with 50% of children scoring above cut-off. The most common internalising behaviour problems were somatic complaints (n = 28), followed by withdrawn behaviour (n = 20), emotional reactivity (n = 15) and anxious/depressed behaviour (n = 10). Externalising behavioural problems were less prevalent with 30% (n = 21) of children scoring within the clinical range. Aggressive behaviour (n = 12) was the

most common externalising behaviour problem followed by attention problems ( $n = 8$ ). Sleeping problems ( $n = 3$ ) was the least common behaviour problem (see Table 2).

Table 2  
*Descriptive statistics for maternal mental health and child behaviour problems*

|                                                      | M     | SD    | <u>Above cut-off</u> |      |
|------------------------------------------------------|-------|-------|----------------------|------|
|                                                      |       |       | N                    | %    |
| Directly experienced life events (LE) <sup>1</sup>   | 2.36  | 2.13  |                      |      |
| Substance abuse (AUDIT) <sup>1</sup>                 | 1.30  | 3.45  |                      |      |
| Hazardous drinking                                   |       |       | 5                    | 7.1  |
| Alcohol dependence                                   |       |       | 2                    | 2.9  |
| Depression (CESD) <sup>1</sup>                       | 17.40 | 14.05 | 35                   | 50   |
| Posttraumatic Stress Disorder (HTS) <sup>1</sup>     | 59.67 | 21.36 | 16                   | 22.9 |
| Functional disability (SDS) <sup>1</sup>             | 7.11  | 6.75  |                      |      |
| Total behaviour problems (CBCL) <sup>2 3</sup>       | 46.41 | 29.30 | 31                   | 44.3 |
| Sleep                                                | 3.16  | 2.67  | 3                    | 4.3  |
| Internalising behaviour problems (CBCL) <sup>2</sup> | 14.67 | 11.07 | 35                   | 50.0 |
| Emotional reactive                                   | 3.20  | 3.39  | 15                   | 21.4 |
| Anxious/depressed                                    | 3.73  | 2.85  | 10                   | 14.3 |
| Somatic                                              | 4.61  | 3.57  | 28                   | 40.0 |
| Withdrawn                                            | 3.13  | 3.02  | 20                   | 28.6 |
| Externalising behaviour problems (CBCL) <sup>2</sup> | 14.59 | 9.07  | 21                   | 30.0 |
| Attention                                            | 2.74  | 1.97  | 8                    | 11.4 |
| Aggression                                           | 11.84 | 7.77  | 12                   | 17.1 |

<sup>1</sup>Maternal measures

<sup>2</sup>Child measures

<sup>3</sup>Total behaviour problems comprise of internalising behaviour problems, externalising behaviour problems and sleeping problems.

### **Maternal mental health as a predictor of child behaviour outcomes**

The children of mothers with depression ( $M = 53.74$ ,  $SE = 28.53$ ) were significantly more likely to display behaviour problems  $t(68) = 2.15$ ,  $p = .035$ , compared to the children of mothers without depression ( $M = 39.09$ ,  $SE = 28.59$ ). The children of mothers meeting criteria for PTSD ( $M = 54.06$ ,  $SE = 18.97$ ) were more likely to

display behaviour problems compared to the children of mothers who did not meet criteria for PTSD ( $M = 44.25$ ,  $SE = 30.76$ ), but this was not a significant effect  $t(58) = 1.19$ ,  $p = .238$ . The children of mothers who abused alcohol ( $M = 52.60$ ,  $SE = 24.52$ ) were also more likely to display behaviour problems, compared to the children of mothers who did not abuse alcohol ( $M = 45.94$ ,  $SE = 29.74$ ), but this effect was also was not significant  $t(68) = .49$ ,  $p = .628$  (see table 3).

Table 3  
*Comparison of CBCL scores for child behaviour problems based on maternal mental status*

|                                              | M     | SD    | Df | t    | p    |
|----------------------------------------------|-------|-------|----|------|------|
| Maternal depression (CESD)                   |       |       | 68 | 2.15 | .035 |
| Children of mothers with depression          | 53.74 | 28.53 |    |      |      |
| Children of mothers without depression       | 39.09 | 28.59 |    |      |      |
| Maternal PTSD (HTS)                          |       |       | 58 | 1.19 | .238 |
| Children of mothers with PTSD                | 54.06 | 18.97 |    |      |      |
| Children of mothers without PTSD             | 44.25 | 30.76 |    |      |      |
| Maternal alcohol abuse (AUDIT)               |       |       | 68 | .49  | .628 |
| Children of mother who abuse alcohol         | 52.60 | 24.52 |    |      |      |
| Children of mothers who do not abuse Alcohol | 45.94 | 29.74 |    |      |      |

Table 4 presents the results of the regression analyses with predictor variables, their standardized coefficients and significance levels for the outcome variables: child total behaviour problems (Model 1), child internalising behaviour problems (Model 2) and child externalising behaviour problems (Model 3). Table 5 presents the summary statistics for the regression analysis.

1  
2  
3  
4  
5  
6  
7  
8  
9  
10  
11  
12  
13  
14  
15  
16  
17  
18  
19  
20  
21  
22  
23  
24  
25  
26  
27  
28  
29  
30  
31  
32  
33  
34  
35  
36  
37  
38  
39  
40  
41  
42  
43  
44  
45  
46  
47  
48  
49

Table 4  
*Parameters for the variables predicting child behaviour outcomes (N=59)*

| Model |                                   | Unstandardised |            | Standardised Beta coefficients | t     | Sig. | 95% Confidence Interval |             |
|-------|-----------------------------------|----------------|------------|--------------------------------|-------|------|-------------------------|-------------|
|       |                                   | $\beta$        | Std. error |                                |       |      | Lower limit             | Upper limit |
| 1     | Total problems (Constant)         | 26.02          | 11.49      |                                | 2.27  | .028 | 4.33                    | 47.71       |
|       | Traumatic life events (LE)        | -1.79          | 1.91       | -.13                           | -.94  | .352 | -5.40                   | 1.81        |
|       | Alcohol dependance/abuse (AUDIT)  | -.14           | 1.07       | -.02                           | -.13  | .894 | -2.16                   | 1.87        |
|       | Depression (CESD)                 | .20            | .33        | .10                            | .61   | .546 | -.42                    | .82         |
|       | Functional disability (SDS)       | .24            | .60        | .06                            | .40   | .688 | -.89                    | 1.38        |
|       | PTSD (HTS)                        | .35            | .26        | .27                            | 1.38  | .173 | -.13                    | 0.83        |
| 2     | Internalising problems (Constant) | 8.14           | 4.30       |                                | 1.89  | .064 | .02                     | 16.27       |
|       | Traumatic life events (LE)        | -1.18          | .72        | -.23                           | -1.64 | .106 | -2.53                   | .18         |
|       | Alcohol dependance/abuse (AUDIT)  | -.39           | .40        | -.13                           | -.99  | .328 | -1.15                   | .36         |
|       | Depression (CESD)                 | .14            | .12        | .19                            | 1.12  | .268 | -.09                    | .37         |
|       | Functional disability (SDS)       | .06            | .22        | .04                            | .28   | .781 | -.36                    | .49         |
|       | PTSD (HTS)                        | .12            | .10        | .24                            | 1.29  | .203 | -.06                    | .30         |
| 3     | Externalising problems (Constant) | 6.05           | 3.62       |                                | 1.67  | .100 | -.78                    | 12.88       |
|       | Traumatic life events (LE)        | -.15           | .60        | -.03                           | -.25  | .807 | -1.28                   | .99         |
|       | Alcohol dependance/abuse (AUDIT)  | .37            | .34        | .15                            | 1.12  | .270 | -.26                    | 1.01        |
|       | Depression (CESD)                 | .01            | .10        | .02                            | .11   | .909 | -.18                    | .21         |
|       | Functional disability (SDS)       | .02            | .19        | .01                            | .08   | .936 | -.34                    | .37         |
|       | PTSD (HTS)                        | .14            | .08        | .34                            | 1.79  | .079 | -.01                    | .30         |

- 1. Outcome: total child behaviour problems (CBCL)
- 2. Outcome: internalising child behaviour problems (CBCL)
- 3. Outcome: externalising child behaviour problems (CBCL)

Table 5  
 Model summary predicting child behaviour problems

| Model | R <sup>2</sup> | ΔR <sup>2</sup> | F    | df1 | df2 | p    |
|-------|----------------|-----------------|------|-----|-----|------|
| 1     | .119           | .036            | 1.44 | 5   | 53  | .227 |
| 2     | .150           | .070            | 1.88 | 5   | 53  | .114 |
| 3     | .147           | .067            | 1.83 | 5   | 53  | .123 |

1. Predictors: maternal traumatic life events (LE), maternal alcohol dependence/abuse (AUDIT), maternal depression (CESD), maternal functional disability (SDS), maternal PTSD (HTS). Outcome: total child behaviour problems (CBCL)
2. Predictors: maternal traumatic life events (LE), maternal alcohol dependence/abuse (AUDIT), maternal depression (CESD), maternal functional disability (SDS), maternal PTSD (HTS). Outcome: internalising child behaviour problems (CBCL)
3. Predictors: maternal traumatic life events (LE), maternal alcohol dependence/abuse (AUDIT), maternal depression (CESD), maternal functional disability (SDS), maternal PTSD (HTS). Outcome: externalising child behaviour problems (CBCL)

The linear combination of maternal variables, namely, traumatic life events, PTSD, depression, alcohol dependence/abuse and functional disability explained 3.63% of the variance in total child behaviour problems in model 1. The amount of variance explained was not significant  $F(5,53) = 1.44, p = .226$ . None of the predictor variables significantly contributed to predicting child behaviour problems within this model. Maternal PTSD  $\beta = .35, t(59) = 1.38, p = .173$  made the largest contribution to explaining child total behaviour problems, based on standardised beta coefficients and significance levels, followed by traumatic life events  $\beta = -1.79, t(59) = -.94, p = .352$ , depression  $\beta = .20, t(59) = .61, p = .546$ , disability in functioning  $\beta = .24, t(59) = .40, p = .688$  and alcohol dependence/abuse  $\beta = -.14, t(59) = -.13, p = .894$ .

The linear combination of the maternal variables in model 2 explained 7.02% of the variance in child internalising behaviour problems. The amount of variance explained in this model was also not significant  $F(5,53) = 1.44, p = .226$ . None of the predictor variables significantly contributed to predicting child internalising behaviour problems. Maternal PTSD  $\beta = .12, t(59) = 1.29, p = .203$  made the largest contribution to explaining child internalising behaviour problems, based on standardised Beta coefficients, followed by traumatic life events  $\beta = -1.18, t(59) = -1.64, p = .106$ , depression  $\beta = .14, t(59) = 1.12, p = .268$ , alcohol dependence/abuse  $\beta = -.39, t(59) = -.99, p = .328$  and functional disability  $\beta = .06, t(59) = .28, p = .781$ .

1  
2  
3 Maternal variables explained 6.66% of the variance in child externalising  
4 behaviour problems in model 3 and the variance explained was once again not  
5 significant  $F(5,53) = 1.83, p = .123$ . None of the predictor variables significantly  
6 contributed to explaining child externalising behaviour problems. Maternal PTSD  $\beta =$   
7  
8  
9  
10  
11  
12  
13  
14  
15  
16  
17  
18  
19  
20  
21  
22  
23  
24  
25  
26  
27  
28  
29  
30  
31  
32  
33  
34  
35  
36  
37  
38  
39  
40  
41  
42  
43  
44  
45  
46  
47  
48  
49  
50  
51  
52  
53  
54  
55  
56  
57  
58  
59  
60  
Maternal PTSD  $\beta =$   
.14,  $t(59) = 1.79, p = .079$  made the largest contribution, based on standardised beta  
coefficients and significance levels, followed by alcohol dependence/abuse  $\beta = .37,$   
 $t(59) = 1.12, p = .270$ , traumatic life events  $\beta = -.15, t(59) = -.25, p = .807$ , depression  
 $\beta = .01, t(59) = .11, p = .909$  and functional disability  $\beta = .02, t(59) = .08, p = .936$ .

## DISCUSSION

The present study examined the long term effects of maternal mental health and child behaviour outcomes in a sample of mother-child dyads infected with HIV. Firstly, we found that maternal mental disorders and child behaviour problems were common among HIV infected mothers and vertically infected children. The overall prevalence of maternal psychiatric disorders, (based on self-report assessments)-data, was 27.6%. Previous studies have reported prevalence rates of 19% to 56% among HIV infected samples. [5-83-6] Half of mothers in this study scored above the cut-off for depression, followed by 22.9% for PTSD, 7.1% for alcohol abuse and 2.9% for alcohol dependence. Previous studies similarly have reported high prevalence rates, among samples infected with HIV, for depression (14% - 36%), PTSD (5% - 14.8%) and alcohol dependence (7%). [3-65-8] The results of this study revealed even higher prevalence rates for depression and PTSD and lower prevalence rates for alcohol dependence.

The prevalence rate of psychiatric disorder was also considerably higher than the prevalence rates documented in the general South African population with 4.9% for depression, 4.5% for alcohol abuse and 0.6% for PTSD (12 month prevalence rates). [1] Previous studies have found a high prevalence (28%-34.7%) for postpartum depression in low income populations in South Africa. We found a higher prevalence rate of 50% among this sample for depression. The added emotional and physical load of HIV infection and caring for a child infected with HIV seems to contribute considerably to psychiatric disease burden. The high prevalence rate of maternal psychiatric disorder, especially PTSD, could possibly be biased by female gender, a previously identified risk factor for PTSD in HIV infected individuals.

1  
2  
3 | [2018] The low rate of alcohol dependence might be due to the use of prenatal alcohol  
4 exposure as an exclusion criterion for participation in the study.

5  
6 A high rate of child behaviour problems (44.3% for total behaviour problems)  
7 was also found. The prevalence rate for internalising and externalising behaviour  
8 problems, which fell within the clinical range, was 50% and 30% respectively. [The](#)  
9 [prevalence rate of externalising behaviour problems found within this study was is](#)  
10 [considerably higher than previously reported prevalence rates of 16%-30%. The](#)  
11 [prevalence rate for internalising behaviour problems corresponded with those](#)  
12 [identified in previous studies \(7%-31%\).](#) The children in this sample are therefore at  
13 greater risk of [displaying externalising behaviour problems and developing](#)  
14 [psychiatric consequently psychiatric disorders associated with externalising behaviour](#)  
15 [problems](#), such as anxiety and substance abuse disorders, later in life. [1517,16]

16  
17 Second, children of mothers with depression were significantly more likely to  
18 exhibit behaviour problems than the children of mothers without depression, although  
19 this association was not significant for maternal PTSD or alcohol abuse/dependence.  
20 Various studies have found significant links between maternal depression and  
21 internalising and externalising child behaviour problems. [9-127-10,1412] [Fatigue and](#)  
22 [emotional burnout associated with depression may lead to poor mother-child](#)  
23 [interaction in early infancy which leads and consequently to insecure infant](#)  
24 [attachment and behavioural problems \[3,70\]. The added burden of caring for an ill](#)  
25 [child, guilt associated with transmission of HIV to the child and stressors associated](#)  
26 [with living in poverty may further intensify depressive symptoms. \[71,72\] This The](#)  
27 relationship [between maternal depression and child behaviour problems](#) was  
28 investigated in this study in an effort to control for the probable shared variance  
29 between depression and PTSD. Depression was not a significant predictor within the  
30 regression models of total behaviour problems, internalising or externalising  
31 behaviour problems.

32  
33 Third, maternal trauma exposure, PTSD, depression, alcohol  
34 abuse/dependence and functional disability did not significantly predict child  
35 behaviour outcomes. However, PTSD made the largest contribution in predicting  
36 internalising, externalising and total behaviour problems. This relationship between  
37 PTSD and child behaviour problems warrants further investigation. Similar results  
38 have been reported, a significant association has been found between maternal stress  
39 and anxiety and child internalising and externalising problems. [26,2724,25] The



1  
2  
3 children of mothers with comorbid PTSD and depression also have an increased risk  
4 for internalising and externalising behaviour problems, compared to mothers with  
5 depression alone or no disorder. [15-13] Similar to depression, maternal PTSD may  
6 lead to poor mother child interaction. Parental anxiety is associated with an  
7 overinvolved parenting style and a negative parental attitudes during interaction with  
8 children. [73] Children may model parent's anxious behaviour; parental vigilance,  
9 intrusion and discouragement of independent problems solving may lead to a limited  
10 sense of competence and autonomy in the children which, in turn, can leads to anxiety  
11 within the child. [74] Maternal antenatal anxiety may have adverse consequences on  
12 child neurodevelopment which may lead to and subsequent child behavioural and  
13 emotional problems. [75] -While previous studies have found significant associations  
14 between parental (specifically maternal) alcohol abuse and child developmental and  
15 behaviour problems, [3735,7668] in the present study no significant relationship was  
16 found between alcohol dependence/abuse, functional disability and child behavioural  
17 outcomes in regression analyses.

18  
19 A number of study limitations deserve mention. In eight cases, there was a change in  
20 the caregiver completing the maternal assessment at 12 months compared with the  
21 caregiver completing the child assessment at 42 months. The change in caregiver may  
22 have, in itself, contributed to a used behaviour problems, and the Cearegivers may have  
23 had a limited sense of the child's temperament (dueowing to the short period of caring  
24 for the child) leading to inaccurate representation of the child's behaviour. Several  
25 confounding factors, apart from maternal mental health, may have influenced child  
26 behaviour problems. Maternal physical health, child physical health, change in child's  
27 medication (assigned treatment arm), socio-economic stressors and parenting styles  
28 were not measured in this study and may have contributed to child behaviour  
29 problems. Future studies should include assess these factors as potential confounders.  
30 Maternal mental health at only one time point (12 months postpartum) was included  
31 in this analysis. Intervening maternal and/or child factors e.g. effects of HIV-related  
32 CNS infections or encephalopathy on the developing brain between 12 and 42 months  
33 may have contributed to child behavioural outcomes.

34  
35 ~~d and, as such, w haveed on~~ More than one administrator was used which may  
36 have caused inconsistency in the administration of self-reports. Additionally, the  
37 Maternal mental state and child behaviour outcomes were measured using self-  
38 reports and not a clinician diagnosis. The mental state of the caregivers may have  
39  
40  
41  
42  
43  
44  
45  
46  
47  
48  
49  
50  
51  
52  
53  
54  
55  
56  
57  
58  
59  
60

1  
2  
3 | contributed to biased perceptions of child behaviour being endorsed. Only 70 mother-  
4 | child dyads participated in the study and 11 of the 70 were excluded from the  
5 | regression analysis owing to missing data. The small sample size may have  
6 | compromised statistical power for the analyses. Lastly, there was no HIV negative  
7 | control or comparator group.  
8  
9

10  
11 | Nevertheless, several characteristics of the sample distinguish this study from  
12 | previous research samples. This is, to our knowledge, the first study investigating the  
13 | predictive effect of PTSD on child behaviour in vertically transmitted, HIV infected  
14 | children. ~~The maternal assessments included in this study were completed at 12~~  
15 | ~~months postpartum which was deemed a salient period for examining PTSD in new~~  
16 | ~~mothers and was intended to decrease the risk of confounding by postpartum~~  
17 | ~~depression, as the risk for postpartum depression is highest within the first year after~~  
18 | ~~giving births.~~ The study followed a longitudinal design and investigated the long-term  
19 | child outcomes of maternal mental health at a specific point in time. Biological  
20 | markers (e.g. CD4 counts) indicated that the children were relatively healthy at the  
21 | time of assessment thus minimizing the possibility of poor physical health being a  
22 | confounding factor. All mother-child dyads had routine checkups, counseling, HIV  
23 | information sessions and antiretroviral treatment available to them. The level of  
24 | intervention and care provided may have contributed positively to maternal mental  
25 | health and child behaviour outcomes and requires further investigation. Findings of  
26 | this study highlight the need to screen for and manage maternal PTSD and depression  
27 | in mothers-child dyads infected with HIV. Identifying the mechanisms by which  
28 | maternal mental health variables, specifically PTSD, interact and function in relation  
29 | to child development in vertically transmitted HIV also requires exploration in future  
30 | larger sample longitudinal studies.  
31  
32  
33  
34  
35  
36  
37  
38  
39  
40  
41  
42  
43  
44  
45

#### 46 **Acknowledgements**

47 | We thank the parents and children taking part in the study and the KID-CRU  
48 | personnel. Thanks to Lungiswa Rosy Khethelo and Marina Basson for assistance with  
49 | data collection and to Justin Harvey for assistance with the data analysis.  
50  
51  
52  
53

#### 54 **Funding**

55 | Support for this study was provided by the US National Institute of Allergy and  
56 | Infectious Diseases (NIAID) through the CIPRA network, Grant U19 AI53217; the  
57  
58  
59  
60

1  
2  
3 Departments of Health of the Western Cape and Gauteng, South Africa; and  
4 GlaxoSmithKline. Additional support was provided with Federal funds from the  
5 National Institute of Allergy and Infectious Diseases, National Institutes of Health,  
6 United States Department of Health and Human Services, under Contract No.  
7 HHSN272200800014C. The views expressed in written conference materials or  
8 publications and by speakers and moderators at HHS-sponsored conferences, do not  
9 necessarily reflect the official policies of the Department of Health and Human  
10 Services; nor does mention of trade names, commercial practices, or organizations  
11 imply endorsement by the U.S. Government. Additionally the study was funded  
12 through grants from the Harry Crossley Foundation and the South African Medical  
13 Research Council (MRC). While the work was supported by the MRC, the views and  
14 opinions expressed are not those of the MRC but of the authors of the material  
15 produced.  
16  
17  
18  
19  
20  
21  
22  
23  
24  
25  
26  
27  
28  
29  
30  
31  
32  
33  
34  
35  
36  
37  
38  
39  
40  
41  
42  
43  
44  
45  
46  
47  
48  
49  
50  
51  
52  
53  
54  
55  
56  
57  
58  
59  
60

## REFERENCES

1. Herman AA, Stein DJ, Seedat S, et al. The South African stress and health (SASH) study: 12-month and lifetime prevalence of common mental disorders. S Afr Med J 2009; **99**: 339-44.
2. Atwoli L, Stein DJ, Williams DR. Trauma and posttraumatic stress disorder in South Africa: analysis from the South African Stress and Health Study. BMC Psychiatry; **13**: 182.
3. Tomlinson M, Cooper P, Murray L. The mother-infant relationship and infant attachment in a South African peri-urban settlement. Child Dev 2005; **76**: 1044-54.
4. Joint United Nations Programme on HIV/AIDS. (UNAIDS). Report on the global AIDS epidemic, 2010. [http://www.unaids.org/globalreport/global\\_report.htm](http://www.unaids.org/globalreport/global_report.htm) (accessed 1 Jul 2013)
5. Bing EG, Burnam A, Longshore D, et al. Psychiatric disorders and drug use among human immunodeficiency virus-infected adults in the United States. Arch Gen Psychiatry 2001; **58**: 721-8.
6. Ceisla JA, Roberts JE. Meta-analysis of the relationship between HIV infection and risk for depressive disorders. Am J Psychiatry 2001; **158**: 725-30.
7. Olley BO, Seedat S, Stein DJ. Persistence of psychiatric disorders in a cohort of HIV/AIDS patients in South Africa: a 6-month follow-up study. J Psychosom Res 2006; **61**: 479-84.
8. Myer L, Smit J, Le Roux L, et al. Common mental disorders among HIV-infected individuals in South Africa: prevalence, predictors, and validation of brief psychiatric ratings scales. AIDS Patient Care STDs 2008; **22**: 147-58.
9. Murray L, Cooper PJ. The impact of postpartum depression on child development. Int Rev Psychiatry 1996; **8**: 55-63.
10. Carter AS, Garrity-Rokous FE, Chazan-Cohen R et al. Maternal depression and comorbidity: predicting early parenting, attachment security, and toddler social-emotional problems and competencies. J Am Acad Child Adolesc Psychiatry 2001; **40**: 18-26.

- 1  
2  
3 [11. Luoma I, Tamminen T, Kaukonen P, et al. Longitudinal study of maternal](#)  
4 [depressive symptoms and child well-being. J Am Acad Child Adolesc](#)  
5 [Psychiatry 2001; 40: 1367-74.](#)  
6
- 7  
8 [12. Tomlinson M, Cooper P, Murray L. The mother-infant relationship and infant](#)  
9 [attachment in a South African peri-urban settlement. Child Dev 2005; 76:](#)  
10 [1044-54.](#)  
11
- 12  
13 [13. Gao W, Paterson J, Abbott M, et al. Maternal mental health and child](#)  
14 [behaviour problems at 2 years: findings from the pacific islands families](#)  
15 [study. Aust N Z J Psychiatry 2007; 41: 885-95.](#)  
16
- 17  
18 [14. Chronis AM, Pelham WE, Baumann BL, et al. Maternal depression and early](#)  
19 [positive parenting predict future conduct problems in young children with](#)  
20 [Attention-Deficit/Hyperactivity Disorder. Dev Psychol 2007; 43: 70-82.](#)  
21
- 22  
23 [15. Chemtob CM, Nomura Y, Rajendran K et al. Impact of maternal posttraumatic](#)  
24 [stress disorder and depression following exposure to the September 11 attacks](#)  
25 [on preschool children's behavior. Child Dev 2010; 81: 1129-41.](#)  
26
- 27  
28 [16. Qi CH, Kaiser AP. Behavior problems of preschool children from low-income](#)  
29 [families: review of the literature. Top Early Child Spec; 23:188-216.](#)  
30
- 31  
32 [17. Kagan J, Snidman N. Early childhood predictors of adult anxiety disorders.](#)  
33 [Biol Psychiatry 1999; 46: 1536-1541.](#)  
34
- 35  
36 [18. Williams B, Sanson A, Toumbourou J et al. Patterns and predictors of](#)  
37 [teenagers' use of licit and illicit substances in the Australian Temperament](#)  
38 [Project cohort. Melbourne: University of Melbourne, 2000.](#)  
39
- 40  
41 [19. Kaminer D, Grimsrud A, Myer L, et al. Risk for post-traumatic stress disorder](#)  
42 [associated with different forms of interpersonal violence in South Africa. Soc](#)  
43 [Sci Med 2008; 67: 1589-95.](#)  
44
- 45  
46 [20. Olley BO, Zeier MD, Seedat S, et al. Post-traumatic stress disorder among](#)  
47 [recently diagnosed patients with HIV/AIDS in South Africa. AIDS Care 2005;](#)  
48 [17: 550-557.](#)  
49
- 50  
51 [21. Dailey DE, Humphreys JC, Rankin SH, et al. An exploration of lifetime](#)  
52 [trauma exposure in pregnant low-income African American women. Matern](#)  
53 [Child Health J 2011; 15: 410-8.](#)  
54
- 55  
56 [22. Talge NM, Neal C, Glover V, et al. Antenatal maternal stress and long-term](#)  
57 [effects on child neurodevelopment: how and why? J Child Psychol Psychiatry](#)  
58 [2007; 48: 245-61.](#)  
59
- 60

23. [Murphy DA, Marelich WD, Armistead L, et al. Anxiety/stress among mothers living with HIV: effects on parenting skills and child outcomes. AIDS Care 2010; 22: 1449-58.](#)
24. [Bayer JK, Hiscock H, Ukoumunne OC, et al. Early childhood aetiology of mental health problems: a longitudinal population-based study. J Child Psychol Psychiatry 2008; 49: 1166-74.](#)
25. [Siantz MLL, Coronado N, Dpyvdaitis T. Maternal predictors of behavioural problems among Mexican migrant farmworker children. J Fam Nurs 2010; 16: 322-43.](#)
26. [Barry TD, Dunlap ST, Cotton SJ et al. The influence of maternal stress and distress on disruptive behaviour problems in boys. J Am Acad Child Adolesc Psychiatry 2005; 44: 265-73.](#)
27. [Rodriquez CM. Association between independent reports of maternal parenting stress and children's internalizing symptomatology. J Child and Fam Stud 2011; 20: 631-9.](#)
28. [Chatterji P, Markowitz S. The impact of maternal alcohol and illicit drug use on children's behaviour problems: evidence from the children of the national longitudinal survey of youth. J Health Econ 2001; 20: 703-31.](#)
29. [Mun EY, Fitzgerald HE, Eye AV, et al. Treatment characteristics as predictors of externalising and internalising child behaviour problems in the context of high and low parental psychopathology. Inf Ment Health J 2001; 22: 393-415.](#)
30. [Eiden RD, Edwards AP, Leonard KE. A conceptual model for the development of externalising behaviour problems among kindergarten children of alcoholic families: role of parenting and children's self-regulation. Dev Psychol 2007; 43: 1187-201.](#)
31. [Jones AS. Maternal alcohol abuse/dependence, children's behaviour problems, and home environment: estimates from the national longitudinal survey of youth using propensity score matching. J Stud Alcohol Drugs 2007, 266-275.](#)
32. [Barry CD. \(2005\). South Africa: alcohol today. Addiction 2005; 100: 426-9.](#)
33. [May PA, Brooke L, Gossage JP, et al. Epidemiology of fetal alcohol syndrome in a South African community in the Western Cape Province. Am J Public Health 2000; 90: 1905-12.](#)

- 1  
2  
3  
4  
5  
6  
7  
8  
9  
10  
11  
12  
13  
14  
15  
16  
17  
18  
19  
20  
21  
22  
23  
24  
25  
26  
27  
28  
29  
30  
31  
32  
33  
34  
35  
36  
37  
38  
39  
40  
41  
42  
43  
44  
45  
46  
47  
48  
49  
50  
51  
52  
53  
54  
55  
56  
57  
58  
59  
60
34. [May PA, Gossage JP, Marais A, et al. Maternal risk factors for fetal alcohol syndrome and partial fetal alcohol syndrome in South Africa: a third study. \*Alcohol Clin Exp Res\* 2008; \*\*32\*\*: 738-53.](#)
  35. [Parry CDH, Bhana A, Myers B, et al. Alcohol use in South Africa: findings from the South African community epidemiology network on drug use \(SACENDU\) project. \*J Stud Alcohol Drugs\* 2002; \*\*63\*\*: 430-435.](#)
  36. [Viljoen DL, Gossage JP, Brooke L, et al. Fetal alcohol syndrome epidemiology in a South African community: a second study of a very high prevalence area. \*J Stud Alcohol Drugs\* 2005; \*\*66\*\*: 593-604.](#)
  37. [Molina BSG, Donovan JE, Belenduik KA. Familial loading for alcoholism and offspring behaviour: mediating and moderating influences. \*Alc Clin Exp Res\* 2010; \*\*34\*\*: 1972 – 83.](#)
  38. [Cotton MF, Violari A, Gibb D et al. Early ART followed by interruption is safe and is associated with better outcomes than deferred ART in HIV+ infants: final results from the 6-year randomized CHER trial, South Africa. 19<sup>th</sup> Conference in Retrovirology and Opportunistic Infection 2012. USA: Seattle.](#)
  39. [World Health Organization \(WHO\). Laboratory guidelines for enumerating CD4 T Lymphocytes in the context of HIV/AIDS. Regional Office for South-East Asia 2007. <http://www.who.int/hiv/amds/LaboratoryGuideEnumeratingCD4TLymphocytes.pdf> \(accessed 1 Jul 2013\)](#)
  40. [Mollica R, McDonald L, Massagli M., et al. Measuring Trauma, Measuring Torture, Instructions and Guidance on the Utilization of the Harvard Program in Refugee Trauma's Versions of the Hopkins Symptom Checklist-25 \(HSCL-25\) and the Harvard Trauma Questionnaire \(HTQ\). Cambridge MA: Harvard Program in Refugee Trauma 2004.](#)
  41. [Rothon C, Stansfeld, SA, Mathews C, et al. Reliability of self report questionnaires for epidemiological investigations of adolescent mental health in Cape Town, South Africa. \*J Child Adolesc Ment Health\* 2011; \*\*23\*\*: 119-128.](#)
  42. [Saunders JB, Aasland OG, Babor TF, et al. Development of the Alcohol Use Disorders Identification Test \(AUDIT\): WHO Collaborative Project on Early Detection of persons with Harmful Alcohol Consumption - II. \*Addiction\* 1993; \*\*88\*\*: 791-804.](#)



- 1  
2  
3  
4  
5  
6  
7  
8  
9  
10  
11  
12  
13  
14  
15  
16  
17  
18  
19  
20  
21  
22  
23  
24  
25  
26  
27  
28  
29  
30  
31  
32  
33  
34  
35  
36  
37  
38  
39  
40  
41  
42  
43  
44  
45  
46  
47  
48  
49  
50  
51  
52  
53  
54  
55  
56  
57  
58  
59  
60
43. [Bohn MJ, Babor TF, Kranzler HR. The alcohol use identification test \(AUDIT\): validation of a screening instrument for use in medical settings. J Stud Alcohol 1995; 56: 423-32.](#)
  44. [Cherpitel CJ, Clark WB. Ethnic differences in performance of screening instruments for identifying harmful drinking and alcohol dependence in the emergency room. Alcohol Clin Exp Res 1995; 19: 628-34.](#)
  45. [Cherpitel CJ, Borges G. Performance of screening instruments for alcohol problems in the ER: a comparison of Mexican-Americans and Mexicans in Mexico. Am J Drug Alcohol Abuse 2000; 26: 683-702.](#)
  46. [Medina-Mora E, Carreno S, de la Fuente JR. Experience with the alcohol use disorders identification test \(AUDIT\) in Mexico. Recent Dev Alc 1998; 14: 383-96.](#)
  47. [Seale P, Seale JD, Alvarado M, et al. Prevalence of problem drinking in a Venezuelan Native American population. Alcohol Alcohol 2002; 37: 198-204.](#)
  48. [Leung SF, Arthur D. The alcohol use disorders identification test \(AUDIT\): validation of an instrument for enhancing nursing practice in Hong Kong. Int J Nurs Stud 2000; 37: 57-64.](#)
  49. [Chinyadza E, Moyo IM, Katsumbe TM et al. Alcohol problems among patients attending five primary health care clinics in Harare city. Cent Afr J Med 1993; 39: 26-32.](#)
  50. [Simbayi LC, Kalichman SC, Jooste S, et al. Alcohol use and sexual risks for HIV infection among men and women receiving sexually transmitted infection clinic services in Cape Town, South Africa. J Stud Alcohol Drugs 2004; 65: 434-42.](#)
  51. [Shaffer DN, Njeri R, Justice AC, et al. Alcohol abuse among patients with and without HIV infection attending public clinics in western Kenya. East Afr Med J 2004; 81: 594-8.](#)
  52. [Boyd JH, Weissman MM, Thompson WD, et al. Screening for depression in a community sample. Understanding the discrepancies between depression and diagnostic scales. Arch Gen Psychiatry 1982; 39: 1195-2000.](#)
  53. [Meyers JK, Weissman MM. Use of a self-report symptom scale to detect depression in a community sample. Am J Psychiatry 1980; 137: 1081-4.](#)
  54. [Roberts RE, Vernon SW. The Center for Epidemiological Studies Depression Scale: its use in a community sample. Am J Psychiatry 1983, 140, 41-6.](#)

- 1
  - 2
  - 3
  - 4
  - 5
  - 6
  - 7
  - 8
  - 9
  - 10
  - 11
  - 12
  - 13
  - 14
  - 15
  - 16
  - 17
  - 18
  - 19
  - 20
  - 21
  - 22
  - 23
  - 24
  - 25
  - 26
  - 27
  - 28
  - 29
  - 30
  - 31
  - 32
  - 33
  - 34
  - 35
  - 36
  - 37
  - 38
  - 39
  - 40
  - 41
  - 42
  - 43
  - 44
  - 45
  - 46
  - 47
  - 48
  - 49
  - 50
  - 51
  - 52
  - 53
  - 54
  - 55
  - 56
  - 57
  - 58
  - 59
  - 60
55. [Ghubash R, Daradkeh TK, Al Naseri KS et al. The performance of the Center for Epidemiology Study Depression Scale \(CES-D\) in an Arab female community. \*Int J Soc Psychiatry\* 2000; \*\*46\*\*: 241-9.](#)
56. [Iwata N, Buka S. Race/ethnicity and depressive symptoms: a cross-cultural/ethnic comparison among university students in East Asia, North and South America. \*Soc Sci Med\* 2002; \*\*55\*\*: 2243-52.](#)
57. [Munet-Vilaro F, Folkman S, Gregorich S. Depressive symptomatology in three Latino groups. \*Western J Nurs Res\* 1999; \*\*21\*\*: 209-24.](#)
58. [Guarnaccia PJ, Angel R, Worobey JL. The factor structure of the CES-D in the Hispanic Health and Nutrition Examination Survey: the influences of ethnicity, gender and language. \*Soc Sci Med\* 1989; \*\*29\*\*: 85-94.](#)
59. [Roberts RE, Rhoades HM, Vernon SW. Using the CES-D scale to screen for depression and anxiety: effects of language and ethnic status. \*Psychiatr Res\* 1990; \*\*31\*\*: 69-83.](#)
60. [Kalichman SC, Rompa D, Cage M. Distinguishing between overlapping somatic symptoms of depression and HIV disease in people living with HIV-AIDS. \*J Nerv Ment Dis\* 2000; \*\*188\*\*: 662-70.](#)
61. [Simoni JM, Ng MT. Trauma, coping, and depression among women with HIV/AIDS in New York City. \*AIDS Care\* 2000; \*\*12\*\*: 567-80.](#)
62. [Schuman P, Ohmit SE, Moore J, et al. Human Immunodeficiency Virus Epidemiology Research Study. Perceived need for and use of mental health services by women living with or at risk of human immunodeficiency virus infection. \*J Am Med Womens Assoc\* 2001; \*\*56\*\*: 4-8.](#)
63. [Eller LS, Mahat G. Psychological factors in Nepali former commercial sex workers with HIV. \*J Nurs Sch\* 2003; \*\*35\*\*: 53-60.](#)
64. [Sheehan DV. \*The Anxiety Disease\*. Scribner: New York 1983.](#)
65. [Troeman CE, Spies G, Cherner M, et al. Impact of childhood trauma on functionality and quality of life in HIV-infected women. \*Health and Quality of Life Outcomes\* 2011; \*\*9\*\*:84.](#)
66. [Achenbach TM, Rescorla LA. \*Manual for the ASEBA school-age forms and profiles\*. Burlington: University of Vermont 2001.](#)
67. [Calkins SD, Dedmon SE. Physiological and behavioral regulation in two-year-old children with aggressive/destructive behavior problems. \*J Abnorm Child Psychol\* 2000; \*\*28\*\*: 103-18.](#)

- 1  
2  
3  
4  
5  
6  
7  
8  
9  
10  
11  
12  
13  
14  
15  
16  
17  
18  
19  
20  
21  
22  
23  
24  
25  
26  
27  
28  
29  
30  
31  
32  
33  
34  
35  
36  
37  
38  
39  
40  
41  
42
68. [Gross D, Fogg L, Young M, et al. The equivalence of the child behavior checklist/ 1½-5 across race/ethnicity, income level, and language. Psychol Assessment 2006; 18: 313-323.](#)
69. [Mesman J, Bongers IL, Koot HM. Preschool development pathways to preadolescent internalizing and externalizing problems. J Child Psychol Psychiatry 2001; 42: 679-89.](#)
70. [Cooper PJ, Tomlinson M, Swartz L, et al. Post-partum depression and the mother-infant relationship in a South African peri-urban settlement. Br J Psychiatry 1999; 175: 554-8.](#)
71. [Instone SL. Perceptions of children with HIV infection when not told for so long: implications for diagnosis disclosure. J Pediatr Health Care 2000; 14: 235-43.](#)
72. [Richter LM. Poverty, underdevelopment and infant mental health. J Paediatr Child Health 2003; 39: 243-8.](#)
73. [Hudson JL, Rapee RM. Parent-child interaction and anxiety disorders: an observational study. Behav Res Ther 2001; 39: 1411-27.](#)
74. [Bögels SM, Brechman-Toussaint ML. Family issues in child anxiety: attachment, family functioning, parental rearing and beliefs. Clin Psychol Rev 2006; 26: 834-56.](#)
75. [O'Connor TG, Heron J, Golding J, et al. Report from the Avon longitudinal study of parents and children. Br J Psychiatry 2002; 180: 502-8.](#)
76. [Katwan E, Adnams C, London L. Childhood behavioural and developmental disorders associated with maternal alcohol consumption in Cape Town, South Africa. S Afr Med J 2011; 101: 724-7.](#)

#### REFERENCES

- 43  
44  
45  
46  
47  
48  
49  
50  
51  
52  
53  
54  
55  
56  
57  
58  
59  
60
1. ~~Joint United Nations Programme on HIV/AIDS. (UNAIDS). Report on the global AIDS epidemic, 2010.  
[http://www.unaids.org/globalreport/global\\_report.htm](http://www.unaids.org/globalreport/global_report.htm) (accessed 1 Jul 2013)~~
2. ~~Herman AA, Stein DJ, Seedat S, et al. The South African stress and health (SASH) study: 12-month and lifetime prevalence of common mental disorders. S Afr Med J 2009; 99: 339-44.~~

3. Bing EG, Burnam A, Longshore D, et al. Psychiatric disorders and drug use among human immunodeficiency virus-infected adults in the United States. *Arch Gen Psychiatry* 2001; **58**: 721-8.
4. Ceisla JA, Roberts JE. Meta-analysis of the relationship between HIV infection and risk for depressive disorders. *Am J Psychiatry* 2001; **158**: 725-30.
5. Olley BO, Seedat S, Stein DJ. Persistence of psychiatric disorders in a cohort of HIV/AIDS patients in South Africa: A 6-month follow-up study. *J Psychosom Res* 2006; **61**: 479-84.
6. Myer L, Smit J, Le Roux L, et al. Parker, S., Stein, D.J., & Seedat, S. (2008). Common mental disorders among HIV-infected individuals in South Africa: prevalence, predictors, and validation of brief psychiatric ratings scales. *AIDS Patient Care STDS* 2008; **22**: 147-58.
7. Murray L, Cooper PJ. The impact of postpartum depression on child development. *Int Rev Psychiatry* 1996; **8**: 55-63.
8. Carter AS, Garrity Rokous FE, Chazan Cohen R et al. Maternal depression and comorbidity: predicting early parenting, attachment security, and toddler social-emotional problems and competencies. *J Am Acad Child Adolesc Psychiatry* 2001; **40**: 18-26.
9. Luoma I, Tamminen T, Kaukonen P, et al. Longitudinal study of maternal depressive symptoms and child well-being. *J Am Acad Child Adolesc Psychiatry* 2001; **40**: 1367-74.
10. Tomlinson M, Cooper P, Murray L. The mother-infant relationship and infant attachment in a South African peri-urban settlement. *Child Dev* 2005; **76**: 1044-54.
11. Gao W, Paterson J, Abbott M, et al. Maternal mental health and child behaviour problems at 2 years: findings from the Pacific Islands Families study. *Aust N Z J Psychiatry* 2007; **41**: 885-95.
12. Chronis AM, Pelham WE, Baumann BL, et al. Maternal depression and early positive parenting predict future conduct problems in young children with Attention-Deficit/Hyperactivity Disorder. *Dev Psychol* 2007; **43**: 70-82.
13. Chemtob CM, Nomura Y, Rajendran K et al. Impact of maternal posttraumatic stress disorder and depression following exposure to the September 11 attacks on preschool children's behavior. *Child Dev* 2010; **81**: 1129-41.

14. Sanson A, Hemphill SA, Smart D. Connections between temperament and social development: a review. *Soc Dev* 2004; **13**: 142-70.
15. Kagan J, Snidman N. Early childhood predictors of adult anxiety disorders. *Biol Psychiatry* 1999; **46**: 1536-1541.
16. Williams B, Sanson A, Toumbourou J et al. Patterns and predictors of teenagers' use of licit and illicit substances in the Australian Temperament Project cohort. Melbourne: University of Melbourne, 2000.
17. Kammer D, Grimsrud A, Myer L, et al. Risk for post-traumatic stress disorder associated with different forms of interpersonal violence in South Africa. *Soc Sci Med* 2008; **67**: 1589-95.
18. Olley BO, Zeier MD, Seedat S, et al. Post-traumatic stress disorder among recently diagnosed patients with HIV/AIDS in South Africa. *AIDS Care* 2005; **17**: 550-557.
19. Dailey DE, Humphreys JC, Rankin SH, et al. An exploration of lifetime trauma exposure in pregnant low-income African-American women. *Matern Child Health J* 2011; **15**: 410-8.
20. Talge NM, Neal C, Glover V, et al. Antenatal maternal stress and long-term effects on child neurodevelopment: how and why? *J Child Psychol Psychiatry* 2007; **48**: 245-61.
21. Murphy DA, Marelich WD, Armistead L, et al. Anxiety/stress among mothers living with HIV: effects on parenting skills and child outcomes. *AIDS Care* 2010; **22**: 1449-58.
22. Bayer JK, Hiscock H, Ukoumunne OC, et al. Early childhood aetiology of mental health problems: a longitudinal population-based study. *J Child Psychol Psychiatry* 2008; **49**: 1166-74.
23. Siantz MLL, Coronado N, Dpvydaitis T. Maternal predictors of behavioural problems among Mexican migrant farmworker children. *J Fam Nurs* 2010; **16**: 322-43.
24. Barry TD, Dunlap ST, Cotton SJ et al. The influence of maternal stress and distress on disruptive behaviour problems in boys. *J Am Acad Child Adolesc Psychiatry* 2005; **44**: 265-73.
25. Rodriguez CM. Association between independent reports of maternal parenting stress and children's internalizing symptomatology. *J Child and Fam Stud* 2011; **20**: 631-9.

- 1  
2  
3  
4  
5  
6  
7  
8  
9  
10  
11  
12  
13  
14  
15  
16  
17  
18  
19  
20  
21  
22  
23  
24  
25  
26  
27  
28  
29  
30  
31  
32  
33  
34  
35  
36  
37  
38  
39  
40  
41  
42  
43  
44  
45  
46  
47  
48  
49  
50  
51  
52  
53  
54  
55  
56  
57  
58  
59  
60
26. Chatterji P, Markowitz S. The impact of maternal alcohol and illicit drug use on children's behaviour problems: evidence from the children of the national longitudinal survey of youth. *J Health Econ* 2001; **20**: 703-31.
27. Mun EY, Fitzgerald HE, Eye AV, et al. Treatment characteristics as predictors of externalising and internalising child behaviour problems in the context of high and low parental psychopathology. *Inf Ment Health J* 2001; **22**: 393-415.
28. Eiden RD, Edwards AP, Leonard KE. A conceptual model for the development of externalising behaviour problems among kindergarten children of alcoholic families: role of parenting and children's self-regulation. *Dev Psychol* 2007; **43**: 1187-201.
29. Jones AS. Maternal alcohol abuse/dependence, children's behaviour problems, and home environment: estimates from the national longitudinal survey of youth using propensity score matching. *J Stud Alcohol Drugs* 2007; 266-275.
30. Barry CD. (2005). South Africa: alcohol today. *Addiction* 2005; **100**: 426-9.
31. May PA, Brooke L, Gossage JP, et al. Epidemiology of fetal alcohol syndrome in a South African community in the Western Cape Province. *Am J Public Health* 2000; **90**: 1905-12.
32. May PA, Gossage JP, Marais A, et al. Maternal risk factors for fetal alcohol syndrome and partial fetal alcohol syndrome in South Africa: a third study. *Alcohol Clin Exp Res* 2008; **32**: 738-53.
33. Parry CDH, Bhana A, Myers B, et al. Alcohol use in South Africa: findings from the South African community epidemiology network on drug use (SACENDU) project. *J Stud Alcohol Drugs* 2002; **63**: 430-435.
34. Viljoen DL, Gossage JP, Brooke L, et al. Fetal alcohol syndrome epidemiology in a south African community: a second study of a very high prevalence area. *J Stud Alcohol Drugs* 2005; **66**: 593-604.
35. Molina BSG, Donovan JE, Belenduik KA. Familial loading for alcoholism and offspring behaviour: mediating and moderating influences. *Alc Clin Exp Res* 2010; **34**: 1972-83.
36. Cotton MF, Violari A, Gibb D et al. Early ART followed by interruption is safe and is associated with better outcomes than deferred ART in HIV+ infants: final results from the 6-year randomized CHER trial, South Africa. 19<sup>th</sup> Conference in Retrovirology and Opportunistic Infection 2012. USA: Seattle.

- 1  
2  
3  
4  
5  
6  
7  
8  
9  
10  
11  
12  
13  
14  
15  
16  
17  
18  
19  
20  
21  
22  
23  
24  
25  
26  
27  
28  
29  
30  
31  
32  
33  
34  
35  
36  
37  
38  
39  
40  
41  
42  
43  
44  
45  
46  
47  
48  
49  
50  
51  
52  
53  
54  
55  
56  
57  
58  
59  
60
37. World Health Organization (WHO). Laboratory guidelines for enumerating CD4 T Lymphocytes in the context of HIV/AIDS. Regional Office for South-East Asia 2007.  
<http://www.who.int/hiv/amds/LaboratoryGuideEnumeratingCD4TLymphocytes.pdf> (accessed 1 Jul 2013)
  38. Mollica RF, Caspi Yavin Y, Bollini P et al. The Harvard Trauma Questionnaire. Validating a cross-cultural instrument for measuring torture, trauma and posttraumatic stress disorder in Indochinese refugees. *J Nerv Ment Dis* 1992; **180**: 111-6.
  39. Halepota AA, Wasif SA. Harvard Trauma Questionnaire: Urdu translation: the only cross-culturally validated screening instrument for the assessment of trauma and torture and their sequelae. *J Pak Med Assoc* 2001; **51**: 285-90.
  40. Saunders JB, Aasland OG, Babor TF, et al. Development of the Alcohol Use Disorders Identification Test (AUDIT): WHO Collaborative Project on Early Detection of persons with Harmful Alcohol Consumption—II. *Addiction* 1993; **88**: 791-804.
  41. Bohn MJ, Babor TF, Kranzler HR. The alcohol use identification test (AUDIT): validation of a screening instrument for use in medical settings. *J Stud Alcohol* 1995; **56**: 423-32.
  42. Cherpitel CJ, Clark WB. Ethnic differences in performance of screening instruments for identifying harmful drinking and alcohol dependence in the emergency room. *Alcohol Clin Exp Res* 1995; **19**: 628-34.
  43. Cherpitel CJ, Borges G. Performance of screening instruments for alcohol problems in the ER: a comparison of Mexican Americans and Mexicans in Mexico. *Am J Drug Alcohol Abuse* 2000; **26**: 683-702.
  44. Medina-Mora E, Carreno S, de la Fuente JR. Experience with the alcohol use disorders identification test (AUDIT) in Mexico. *Recent Dev Ale* 1998; **14**: 383-96.
  45. Seale P, Seale JD, Alvarado M, et al. Prevalence of problem drinking in a Venezuelan Native American population. *Alcohol Alcohol* 2002; **37**: 198-204.
  46. Leung SF, Arthur D. The alcohol use disorders identification test (AUDIT): validation of an instrument for enhancing nursing practice in Hong Kong. *Int J Nurs Stud* 2000; **37**: 57-64.



- 1
  - 2
  - 3
  - 4
  - 5
  - 6
  - 7
  - 8
  - 9
  - 10
  - 11
  - 12
  - 13
  - 14
  - 15
  - 16
  - 17
  - 18
  - 19
  - 20
  - 21
  - 22
  - 23
  - 24
  - 25
  - 26
  - 27
  - 28
  - 29
  - 30
  - 31
  - 32
  - 33
  - 34
  - 35
  - 36
  - 37
  - 38
  - 39
  - 40
  - 41
  - 42
  - 43
  - 44
  - 45
  - 46
  - 47
  - 48
  - 49
  - 50
  - 51
  - 52
  - 53
  - 54
  - 55
  - 56
  - 57
  - 58
  - 59
  - 60
47. Chinyadza E, Moyo IM, Katsumbe TM et al. Alcohol problems among patients attending five primary health care clinics in Harare city. *Cent Afr J Med* 1993; **39**: 26-32.
48. Simbayi LC, Kalichman SC, Jooste S, et al. Alcohol use and sexual risks for HIV infection among men and women receiving sexually transmitted infection clinic services in Cape Town, South Africa. *J Stud Alcohol Drugs* 2004; **65**: 434-42.
49. Shaffer DN, Njeri R, Justice AC, et al. Alcohol abuse among patients with and without HIV infection attending public clinics in western Kenya. *East Afr Med J* 2004; **81**: 594-8.
50. Boyd JH, Weissman MM, Thompson WD, et al. Screening for depression in a community sample. Understanding the discrepancies between depression and diagnostic scales. *Arch Gen Psychiatry* 1982; **39**: 1195-2000.
51. Meyers JK, Weissman MM. Use of a self-report symptom scale to detect depression in a community sample. *Am J Psychiatry* 1980; **137**: 1081-4.
52. Roberts RE, Vernon SW. The Center for Epidemiological Studies Depression Scale: its use in a community sample. *Am J Psychiatry* 1983; **140**: 41-6.
53. Ghubash R, Daradkeh TK, Al Naseri KS et al. The performance of the Center for Epidemiology Study Depression Scale (CES-D) in an Arab female community. *Int J Soc Psychiatry* 2000; **46**: 241-9.
54. Iwata N, Buka S. Race/ethnicity and depressive symptoms: a cross-cultural/ethnic comparison among university students in East Asia, North and South America. *Soc Sci Med* 2002; **55**: 2243-52.
55. Munet-Vilaro F, Folkman S, Gregorich S. Depressive symptomatology in three Latino groups. *Western J Nurs Res* 1999; **21**: 209-24.
56. Guarnaccia PJ, Angel R, Worobey JL. The factor structure of the CES-D in the Hispanic Health and Nutrition Examination Survey: the influences of ethnicity, gender and language. *Soc Sci Med* 1989; **29**: 85-94.
57. Roberts RE, Rhoades HM, Vernon SW. Using the CES-D scale to screen for depression and anxiety: effects of language and ethnic status. *Psychiatr Res* 1990; **31**: 69-83.
58. Kalichman SC, Rompa D, Cage M. Distinguishing between overlapping somatic symptoms of depression and HIV disease in people living with HIV-AIDS. *J Nerv Ment Dis* 2000; **188**: 662-70.

- 1  
2  
3  
4  
5  
6  
7  
8  
9  
10  
11  
12  
13  
14  
15  
16  
17  
18  
19  
20  
21  
22  
23  
24  
25  
26  
27  
28  
29  
30  
31  
32  
33  
34  
35  
36  
37  
38  
39  
40  
41  
42  
43  
44  
45  
46  
47  
48  
49  
50  
51  
52  
53  
54  
55  
56  
57  
58  
59  
60
59. Simoni JM, Ng MT. Trauma, coping, and depression among women with HIV/AIDS in New York City. *AIDS Care* 2000; **12**: 567-80.
60. Schuman P, Ohmit SE, Moore J, et al. Human Immunodeficiency Virus Epidemiology Research Study. Perceived need for and use of mental health services by women living with or at risk of human immunodeficiency virus infection. *J Am Med Womens Assoc* 2001; **56**: 4-8.
61. Eller LS, Mahat G. Psychological factors in Nepali former commercial sex workers with HIV. *J Nurs Sch* 2003; **35**: 53-60.
62. Sheehan DV. *The anxiety disease*. Scribner: New York 1983.
63. Arbuckle R, Frye MA, Brecher M, et al. The psychometric validation of the Sheehan Disability Scale (SDS) in patients with bipolar disorder. *Psychiatry Res* 2009; **165**: 163-74.
64. Achenbach TM, Rescorla LA. *Manual for the ASEBA school-age forms and profiles*. Burlington: University of Vermont 2001.
65. Calkins SD, Dedmon SE. Physiological and behavioral regulation in two-year-old children with aggressive/destructive behavior problems. *J Abnorm Child Psychol* 2000; **28**: 103-18.
66. Gross D, Fogg L, Young M, et al. The equivalence of the child behavior checklist/1½-5 across race/ethnicity, income level, and language. *Psychol Assessment* 2006; **18**: 313-323.
67. Mesman J, Bongers IL, Koot HM. Preschool development pathways to preadolescent internalizing and externalizing problems. *J Child Psychol Psychiatry* 2001; **42**: 679-89.
68. Katwan E, Adnams C, London L. Childhood behavioural and developmental disorders associated with maternal alcohol consumption in Cape Town, South Africa. *S Afr Med J* 2011; **101**: 724-7.
